# Supplementary material for: Dinuclear RuIIcomplexes with quinonoid bridges: tuning the electrochemical and spectroscopic properties of redox-switchable NIR dyes through judicious bridge design
Source: Royal Society of Chemistry journal article supplement (doi:10.1039/d0dt01351j), 2020-01-01
Supplement: d0dt01351j1.pdf [file d0dt01351j1.pdf]

## Supporting Information

### **Dinuclear Ru<sup>II</sup> complexes with quinonoid bridges: tuning the electrochemical and spectroscopic properties of redox-switchable NIR dyes through judicious bridge design**

*Shubhadeep Chandra,<sup>a,§</sup> Fritz Weisser,<sup>a,b,§</sup> Sinja Klenk,<sup>b</sup> Julia Beerhues,<sup>a,b</sup> David Schweinfurth,<sup>a,b</sup> and Biprajit Sarkar<sup>\*a,b</sup>*

<sup>a</sup>Lehrstuhl für Anorganische Koordinationschemie, Institut für Anorganische Chemie, Universität Stuttgart, Pfaffenwaldring 55, D-70569, Stuttgart, Germany.

<sup>b</sup>Institut für Chemie und Biochemie, Freie Universität Berlin, Fabeckstraße 34-36, D-14195, Berlin, Germany

#### **Contents**

|                              |         |
|------------------------------|---------|
| Crystallographic Data        | S2-S4   |
| NMR Spectra                  | S5-S10  |
| CV Data                      | S11-S19 |
| EPR Data                     | S20-S21 |
| Spectroelectrochemistry Data | S22-S26 |
| DFT Calculations             | S27-S54 |

## Crystallographic Data

**Table S1** Crystallographic data of **mono2b**<sup>O,N(Mes)</sup>

|                                                                                                   |                                                                                     |
|---------------------------------------------------------------------------------------------------|-------------------------------------------------------------------------------------|
| Complex                                                                                           | <b>mono2b</b> <sup>O,N(Mes)</sup> .0.5CH <sub>2</sub> Cl <sub>2</sub>               |
| Chemical formula                                                                                  | C <sub>33.50</sub> H <sub>33</sub> Cl <sub>2</sub> N <sub>5</sub> O <sub>7</sub> Ru |
| <i>M</i> <sub>r</sub>                                                                             | 789.62                                                                              |
| Crystal System                                                                                    | triclinic                                                                           |
| Space group                                                                                       | <i>P</i> -1                                                                         |
| <i>a</i> (Å)                                                                                      | 11.800(5)                                                                           |
| <i>b</i> (Å)                                                                                      | 12.969(5)                                                                           |
| <i>c</i> (Å)                                                                                      | 24.229(10)                                                                          |
| $\alpha$ (°)                                                                                      | 89.705(16)                                                                          |
| $\beta$ (°)                                                                                       | 76.042(11)                                                                          |
| $\gamma$ (°)                                                                                      | 79.798(12)                                                                          |
| <i>V</i> (Å <sup>3</sup> )                                                                        | 3539(3)                                                                             |
| <i>Z</i>                                                                                          | 4                                                                                   |
| Density (g cm <sup>-3</sup> )                                                                     | 1.482                                                                               |
| F(000)                                                                                            | 1612                                                                                |
| Radiation Type                                                                                    | MoK $\alpha$                                                                        |
| $\mu$ (mm <sup>-1</sup> )                                                                         | 0.647                                                                               |
| Crystal size                                                                                      | 0.48 x 0.32 x 0.17                                                                  |
| Meas. Refl.                                                                                       | 71270                                                                               |
| Indep. Refl.                                                                                      | 13010                                                                               |
| Obsvd. [ <i>I</i> > 2 $\sigma$ ( <i>I</i> )] refl.                                                | 8734                                                                                |
| R <sub>int</sub>                                                                                  | 0.1503                                                                              |
| R [ <i>F</i> <sup>2</sup> > 2 $\sigma$ ( <i>F</i> <sup>2</sup> )], wR( <i>F</i> <sup>2</sup> ), S | 0.0637                                                                              |
| $\Delta\rho_{\max}$ , $\Delta\rho_{\min}$ (e Å <sup>-3</sup> )                                    | 0.759, -0.878                                                                       |

**Table S2 (a)** Selected bond lengths (Å) and selected bond angles (°) of **mono2b**<sup>O,N(Mes)</sup>.0.5CH<sub>2</sub>Cl<sub>2</sub>

| Bond    | Bond lengths | Bond Angle  |            |
|---------|--------------|-------------|------------|
| C1- C2  | 1.501(7)     | N3- Ru1- O1 | 99.62(15)  |
| C1- C6  | 1.390(7)     | N4 -Ru1- O1 | 93.50(15)  |
| C3- C2  | 1.402(7)     | N2- Ru1- O1 | 101.13(16) |
| C3- C4  | 1.377(7)     | N1- Ru1- O1 | 175.31(15) |
| C5- C6  | 1.416(7)     | O2- Ru1- O1 | 77.82(13)  |
| C4- C5  | 1.521(7)     | O1 -C1 -C6  | 125.3(5)   |
| C1- O1  | 1.274(6)     | O1- C1- C2  | 115.6(4)   |
| O2 -C2  | 1.282(6)     | O2- C2- C1  | 116.2(4)   |
| Ru1- O1 | 2.088(3)     | O3- C5- C4  | 116.8(5)   |
| Ru1- O2 | 2.085(3)     | N5- C4- C5  | 115.0(5)   |
| O3- C5  | 1.243(6)     | N3 -Ru1- N1 | 82.47(17)  |
| C4 -N5  | 1.336(6)     | N4- Ru1- N1 | 82.18(17)  |
| Ru1- N3 | 2.010(4)     | N3- Ru1- N4 | 92.52(17)  |
| Ru1- N4 | 2.047(5)     | N4- Ru1- N2 | 165.07(17) |
| Ru1- N2 | 2.049(4)     | N3- Ru1- N2 | 87.97(17)  |
| Ru1- N1 | 2.054(4)     | N2- Ru1- N1 | 83.09(17)  |

**(b)** Hydrogen bonding parameters [bond lengths (Å) and bond angles (°)]

| D-H...A          | d(D-H) | d(H...A) | d(D...A) | <(DHA) |
|------------------|--------|----------|----------|--------|
| N105-H105.....O3 | 0.88   | 2.03     | 2.845(6) | 153.2  |
| N5-H5.....O103   | 0.88   | 2.07     | 2.862(6) | 149.0  |

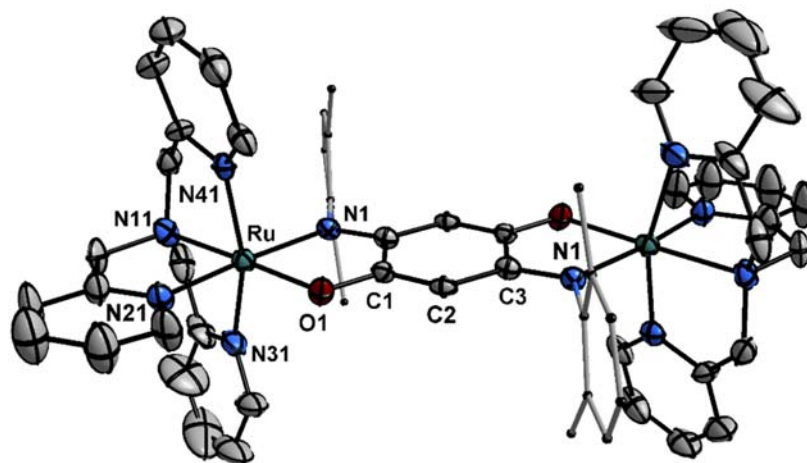

**Figure S1:** Crystal Structure of  $[3^{N(\text{PhMe}_2)}](\text{ClO}_4)_2$  with Ellipsoids Drawn at the 30% Probability Level. H atoms are omitted for clarity.

## NMR Spectra

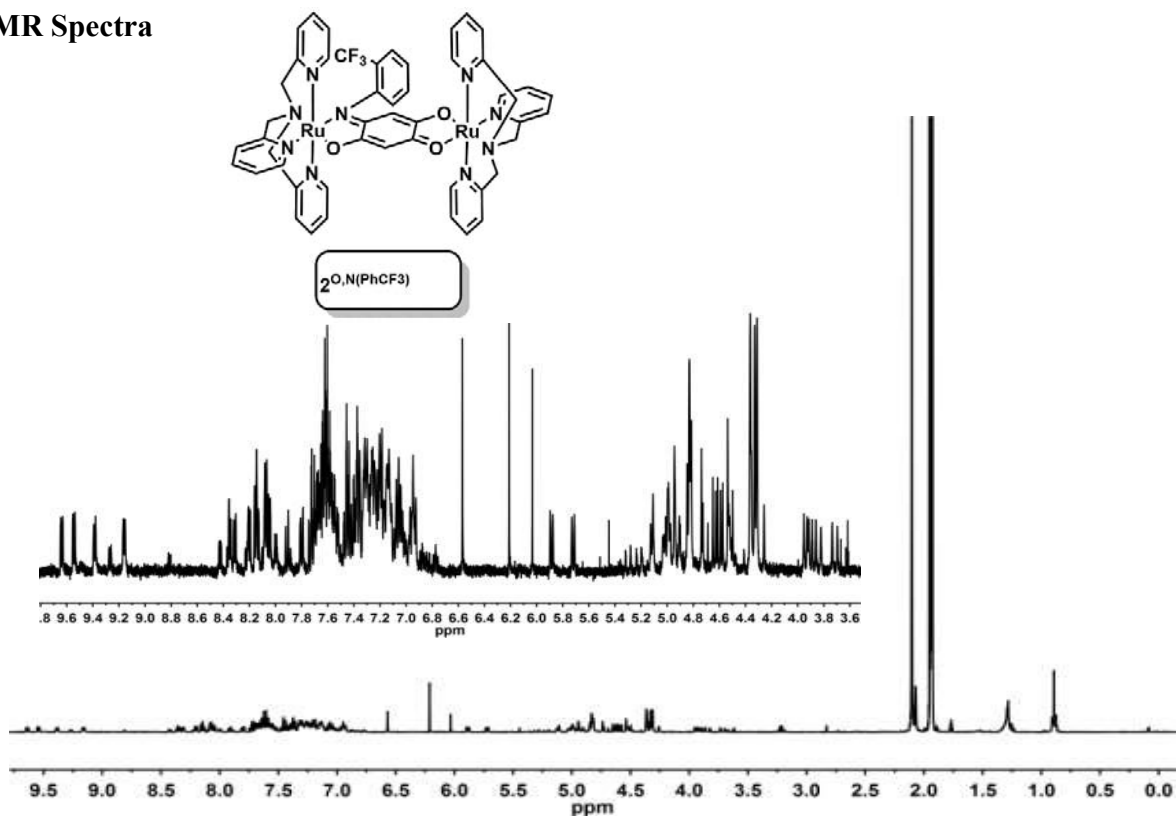

**Figure S2:**  $^1H$  NMR spectrum of  $2^{O,N(PhCF_3)}$  recorded in  $CD_3CN$ . Inset contains expanded region for better visibility. Bottom: Full spectrum.

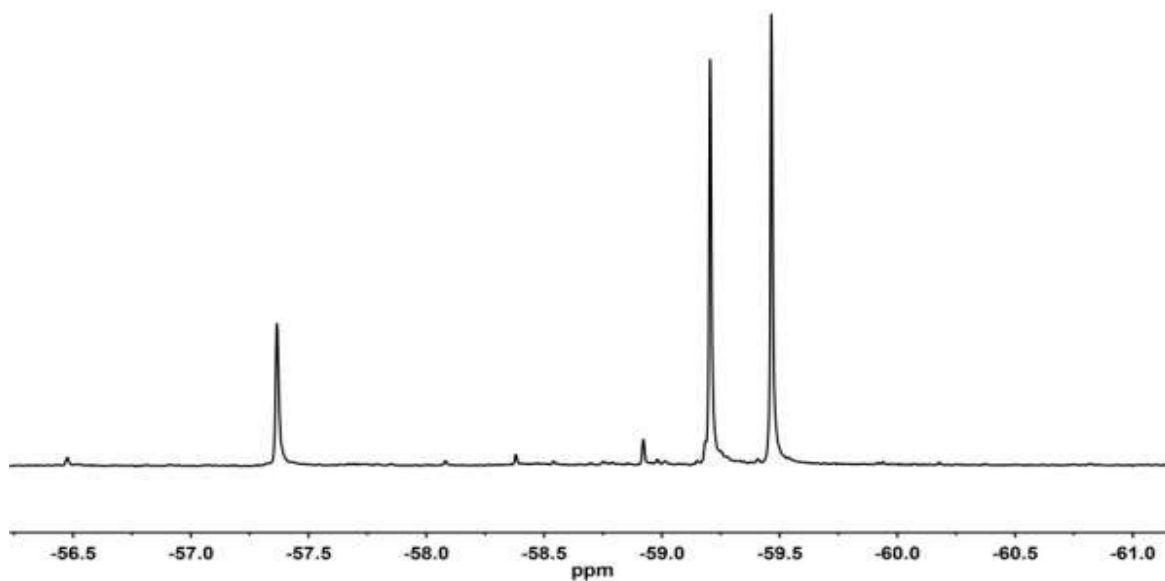

**Figure S3:**  $^{19}F$  NMR spectrum of  $2^{O,N(PhCF_3)}$  recorded in  $CD_3CN$ .

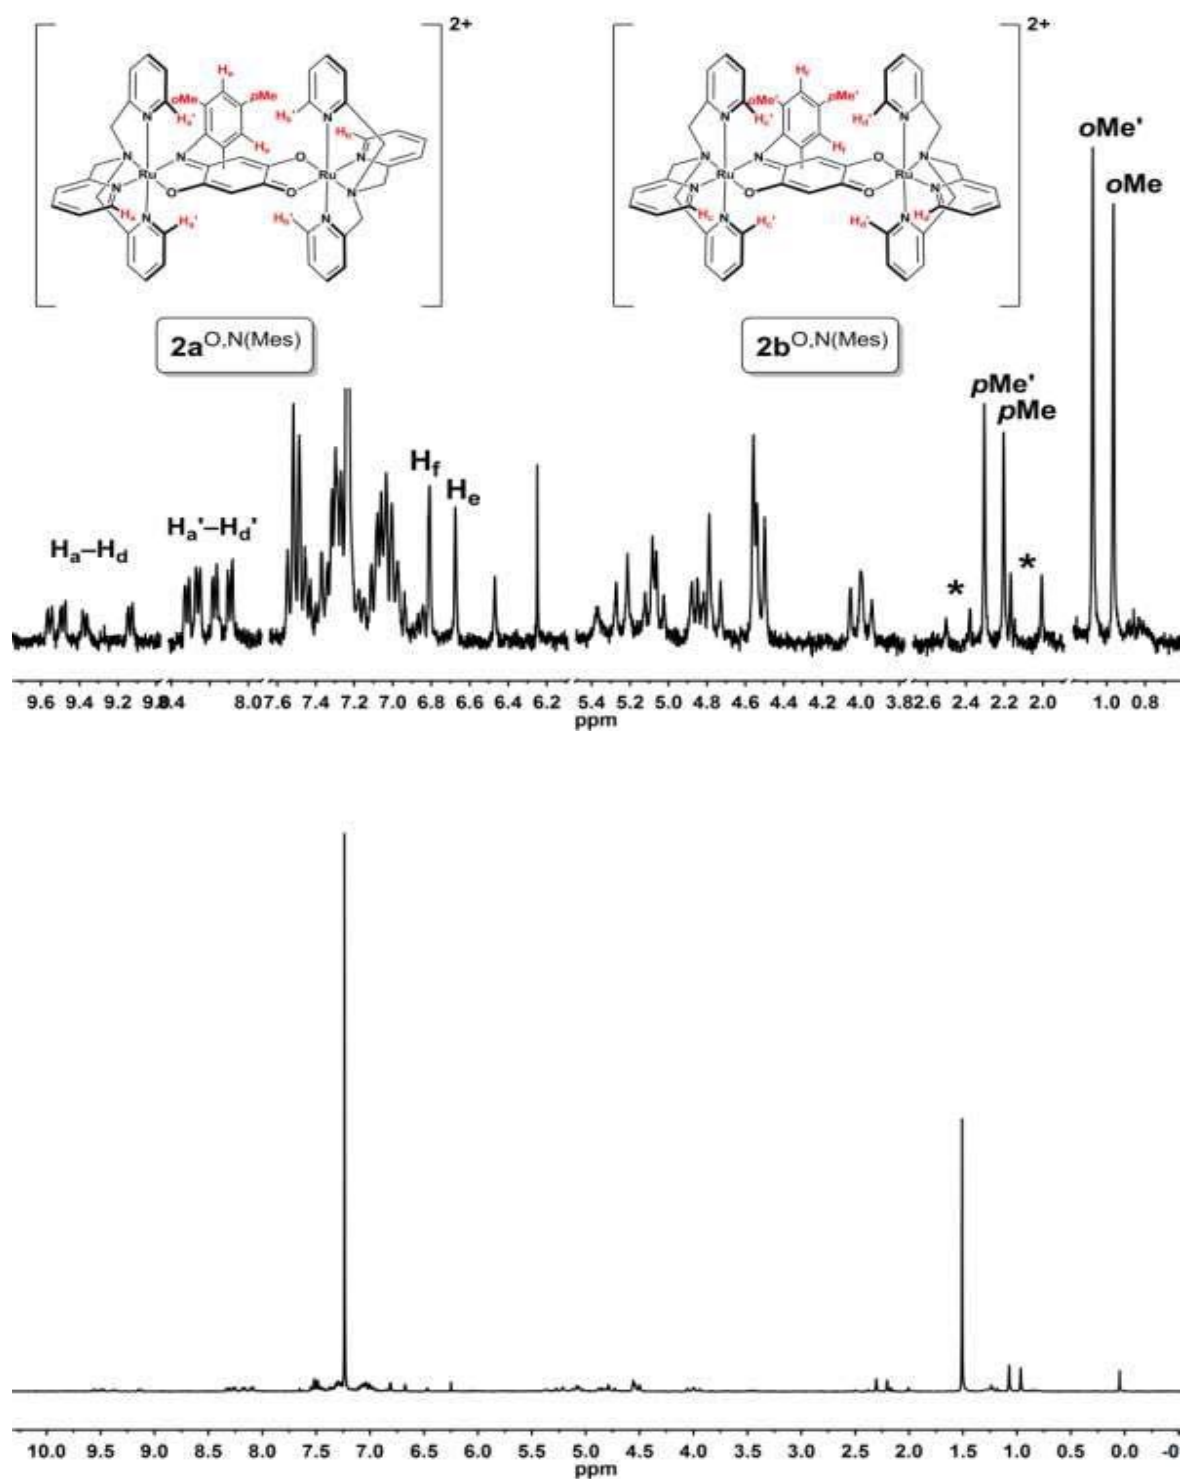

**Figure S4:** <sup>1</sup>H NMR spectrum of **2**<sup>O,N(Mes)</sup> recorded in CDCl<sub>3</sub>. Top: Parts are cut for better visibility; “\*” mark impurities of mono-**2**<sup>O,N(Mes)</sup>. Bottom: Full spectrum.

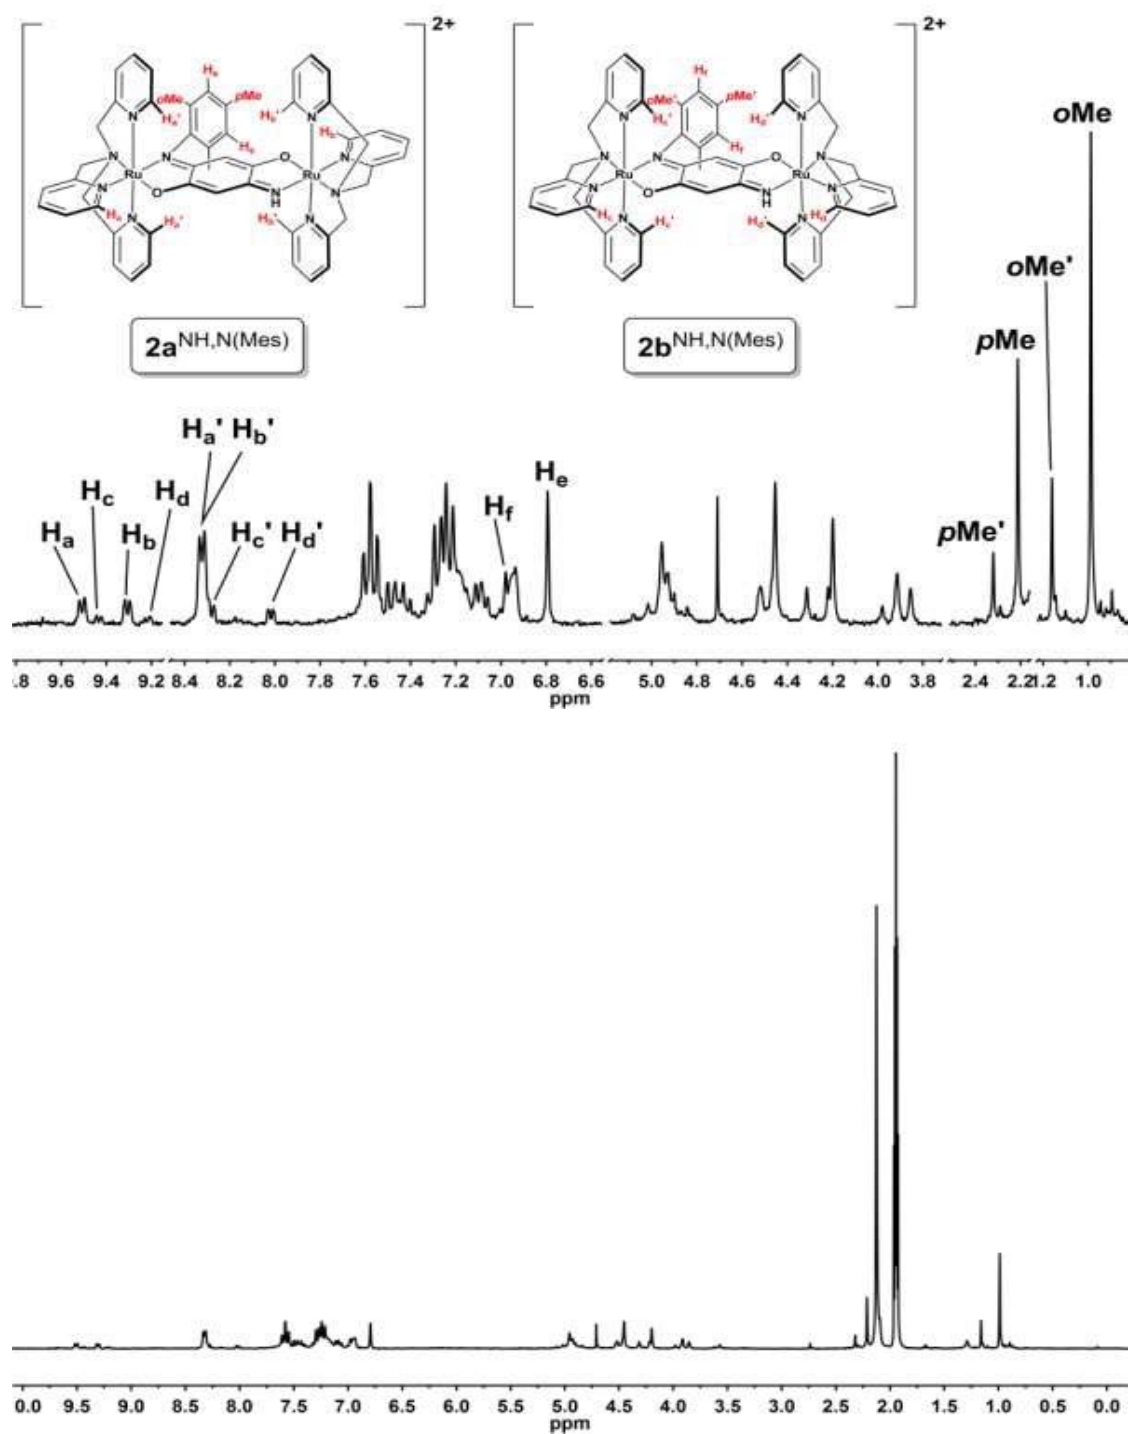

**Figure S5:**  $^1\text{H}$  NMR spectrum of  $2^{\text{NH,N(Mes)}}$  recorded in  $\text{CD}_3\text{CN}$ . Top: Parts are cut for better visibility. Bottom: Full spectrum.

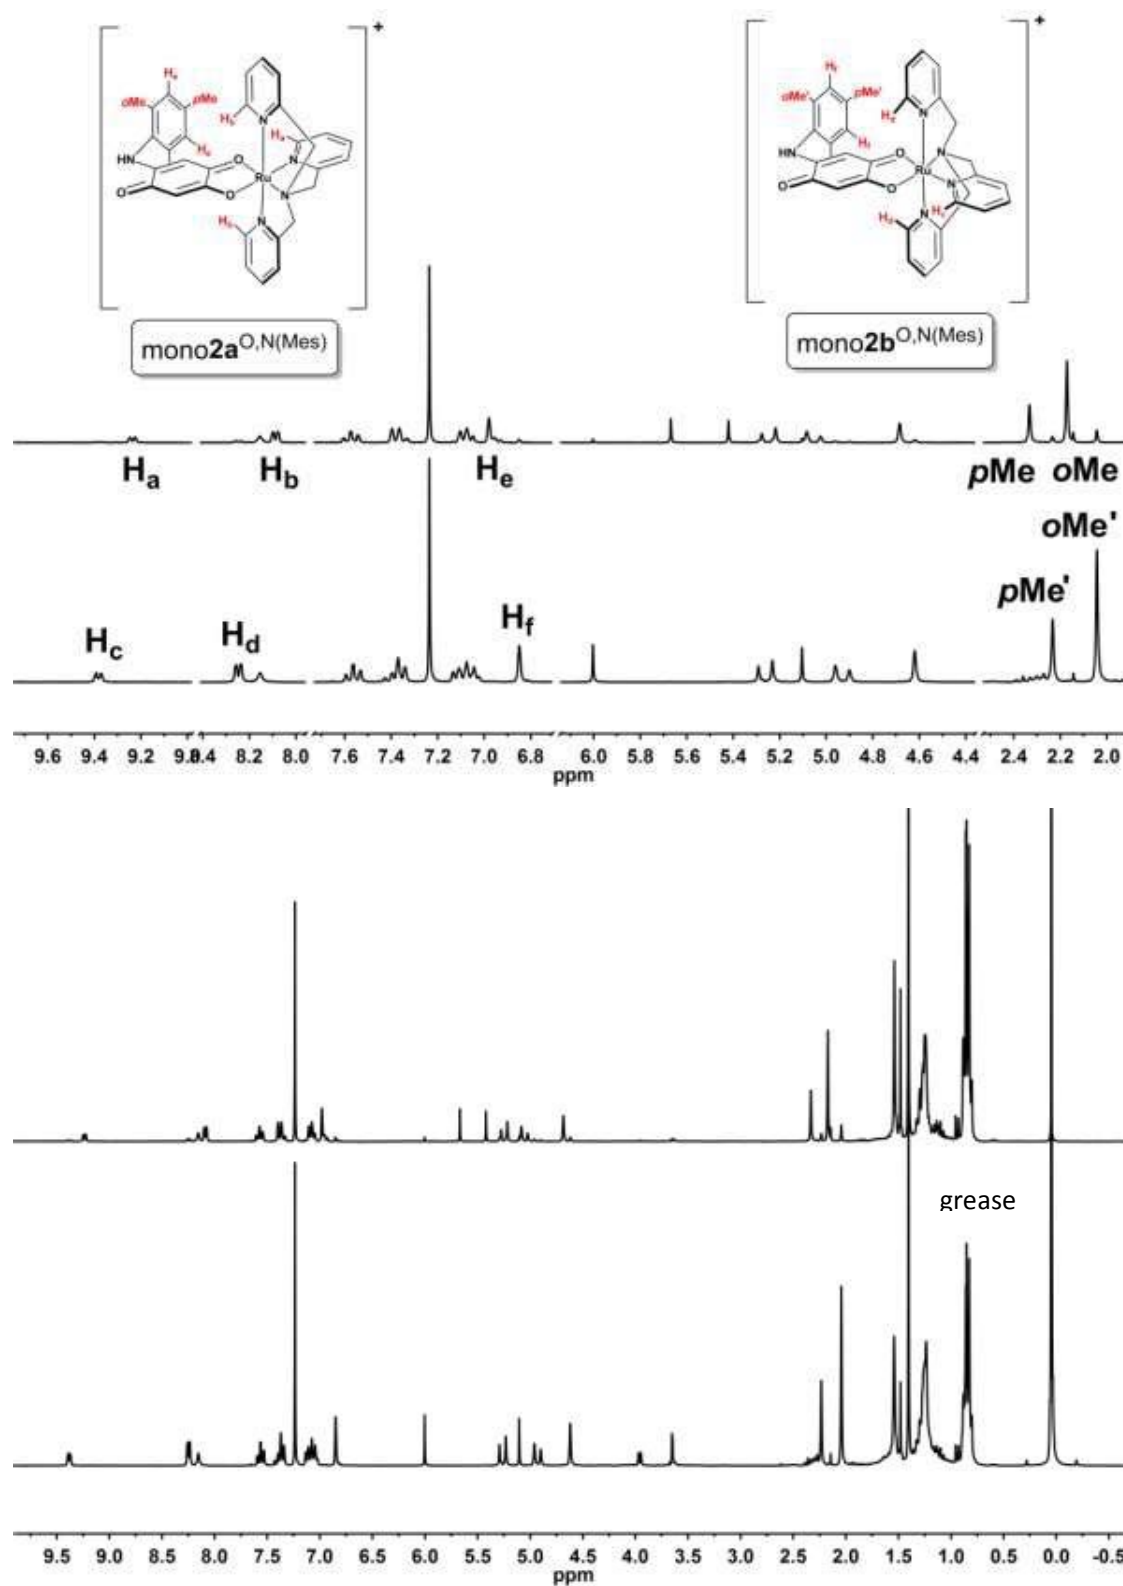

**Figure S6:**  $^1\text{H}$  NMR spectrum of **mono2**<sup>O,N(Mes)</sup> recorded in  $\text{CDCl}_3$ . Top: Parts are cut for better visibility. Bottom: Full spectrum.



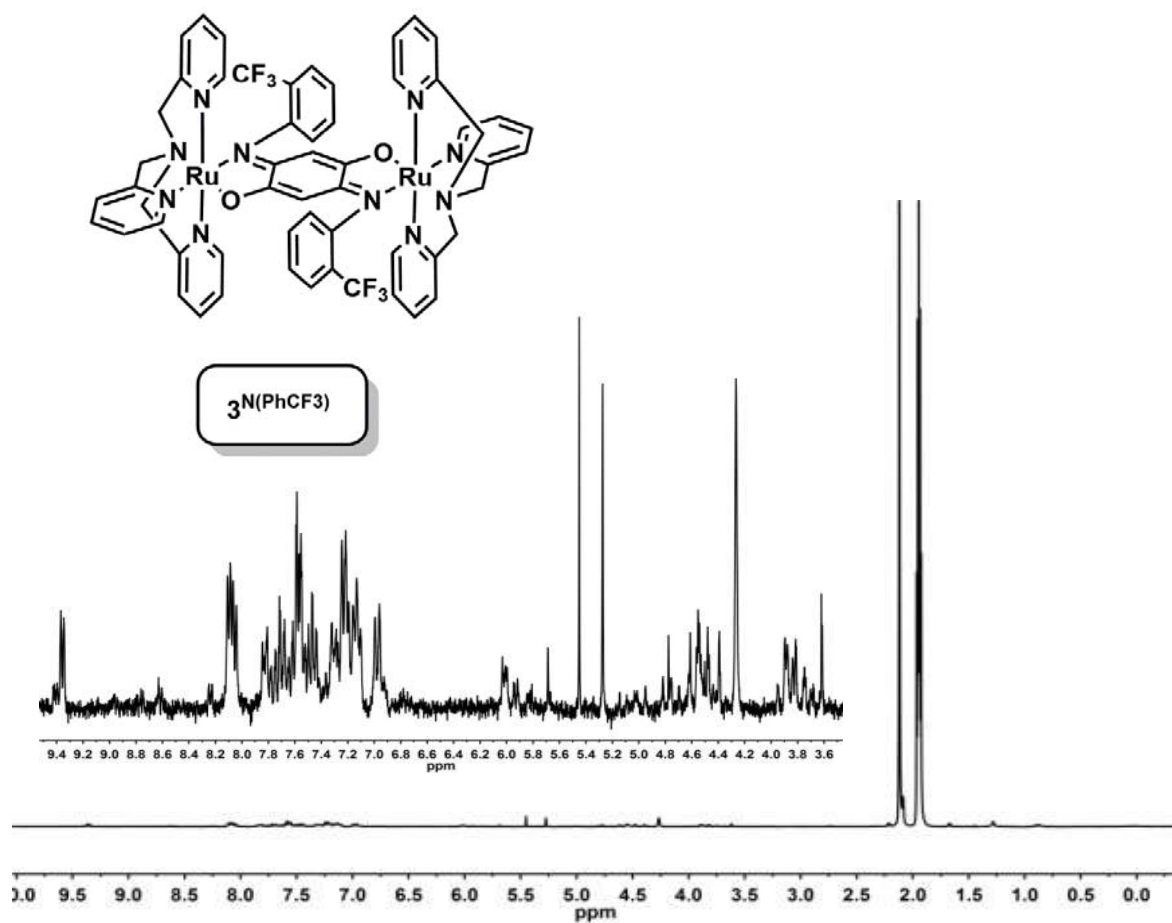

**Figure S7:**  $^1\text{H}$  NMR spectrum of  $3^{N(\text{PhCF}_3)}$  recorded in  $\text{CD}_3\text{CN}$ . Inset contains expanded region for better visibility. Bottom: Full spectrum.

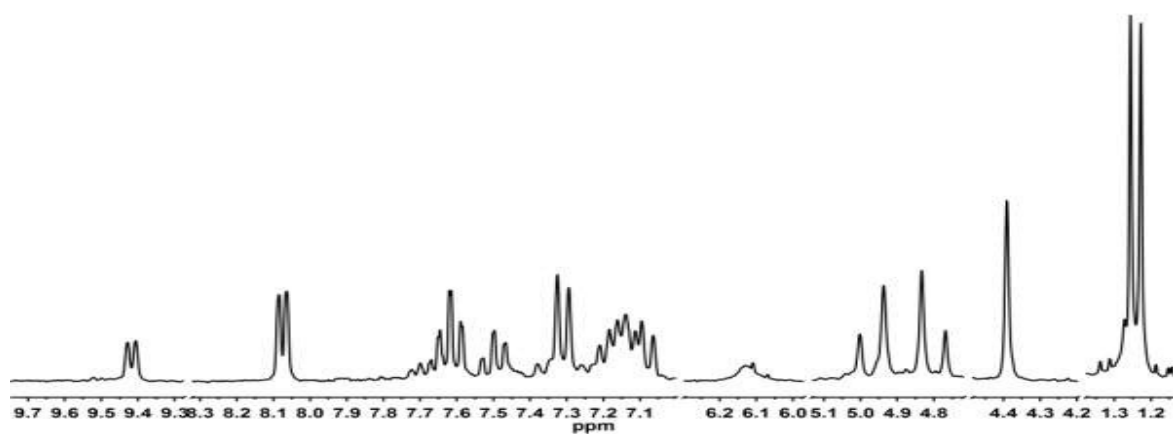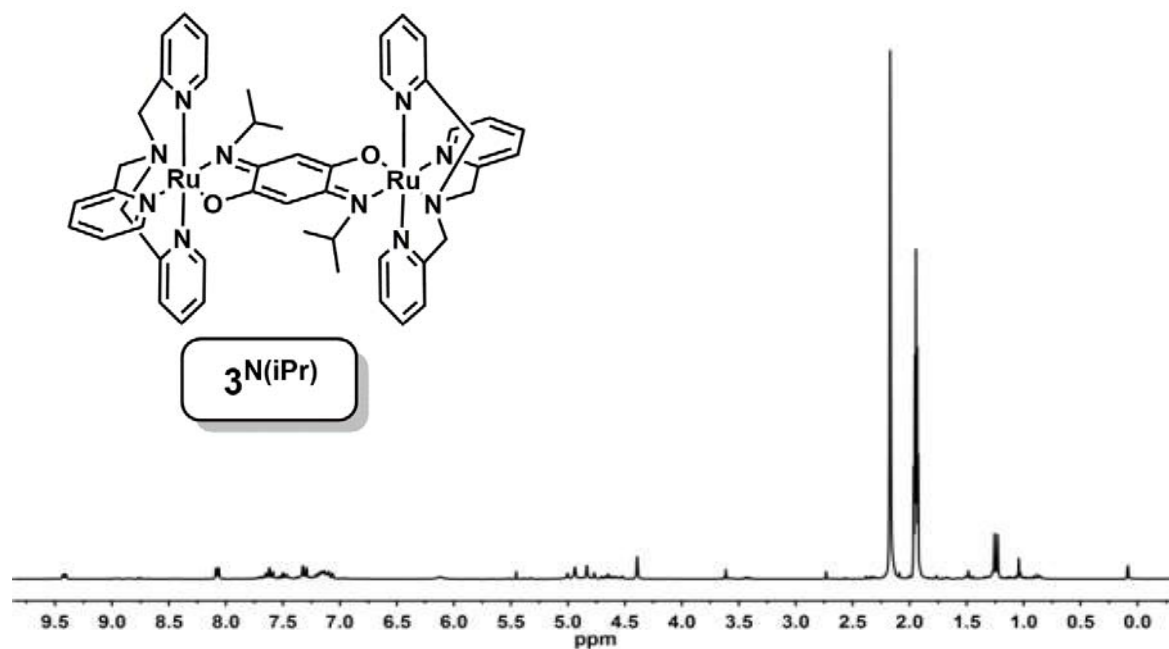

Figure S8:  $^1\text{H}$  NMR spectrum of  $3^{\text{N(iPr)}}$  recorded in  $\text{CD}_3\text{CN}$

CV Data

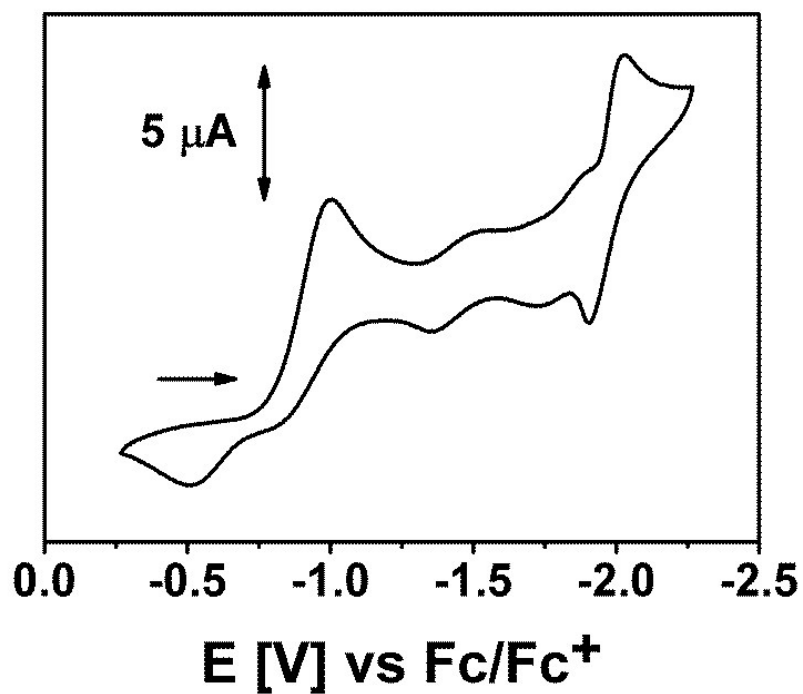

**Figure S9:** Cyclic voltammogram of  $\text{H}_2\text{L}_2^{\text{O,N(PhCF}_3)}$  recorded in  $\text{CD}_3\text{CN}$  (0.1 M  $\text{Bu}_4\text{NPF}_6$ ) at 10 mV/s.

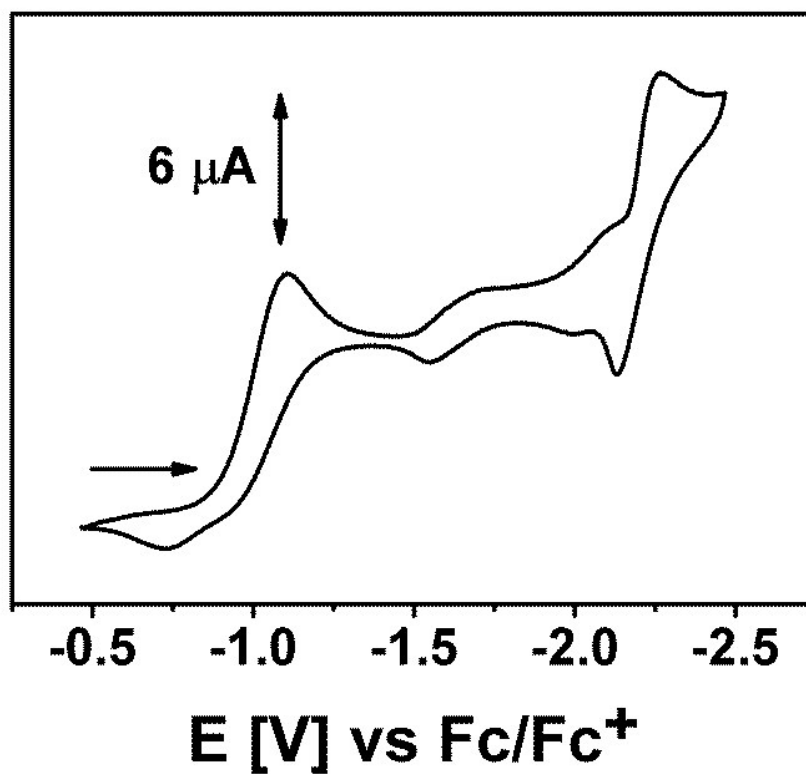

**Figure S10:** Cyclic voltammogram of  $\text{H}_2\text{L}_2^{\text{O,N(Mes)}}$  recorded in  $\text{CD}_3\text{CN}$  ( $0.1 \text{ M Bu}_4\text{NPF}_6$ ) at  $10 \text{ mV/s}$ .

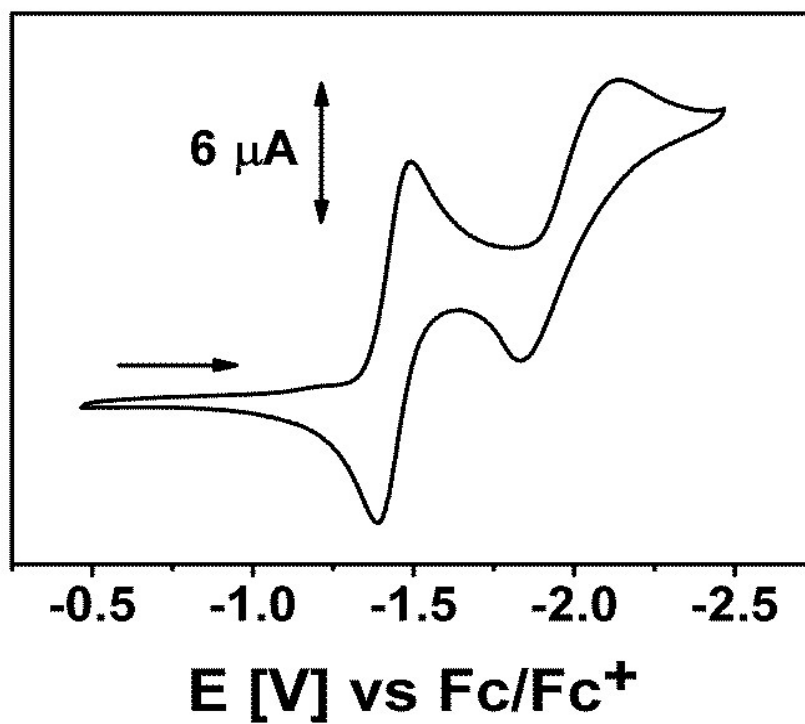

**Figure S11:** Cyclic voltammogram of  $\text{H}_2\text{L2}^{\text{NH}_2\text{N}(\text{Mes})}$  recorded in  $\text{CD}_3\text{CN}$  (0.1 M  $\text{Bu}_4\text{NPF}_6$ ) at 10 mV/s.

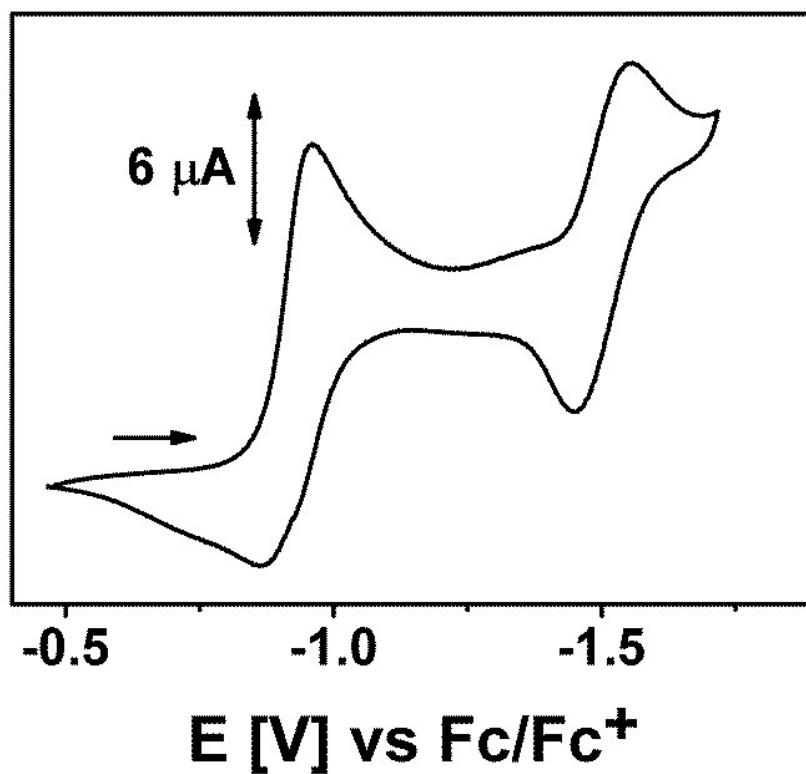

**Figure S12:** Cyclic voltammogram of  $\text{H}_2\text{L3}^{\text{N(PhCF}_3)}$  recorded in  $\text{CD}_3\text{CN}$  (0.1 M  $\text{Bu}_4\text{NPF}_6$ ) at 10 mV/s.

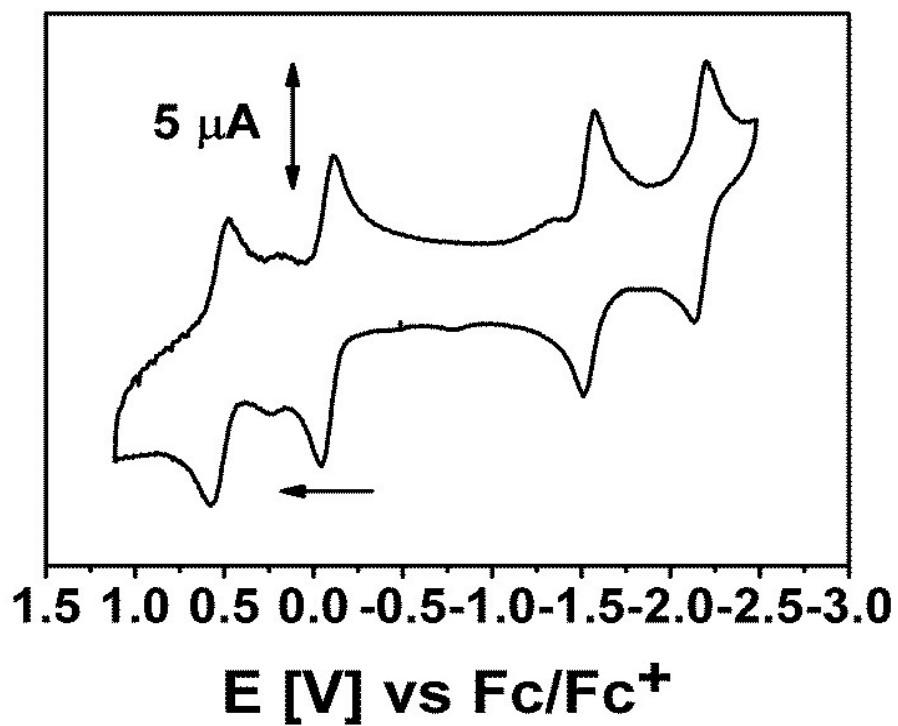

**Figure S13:** Cyclic voltammogram of  $2^{O,N(PhCF_3)}$  recorded in  $CD_3CN$  (0.1 M  $Bu_4NPF_6$ ) at 100 mV/s.

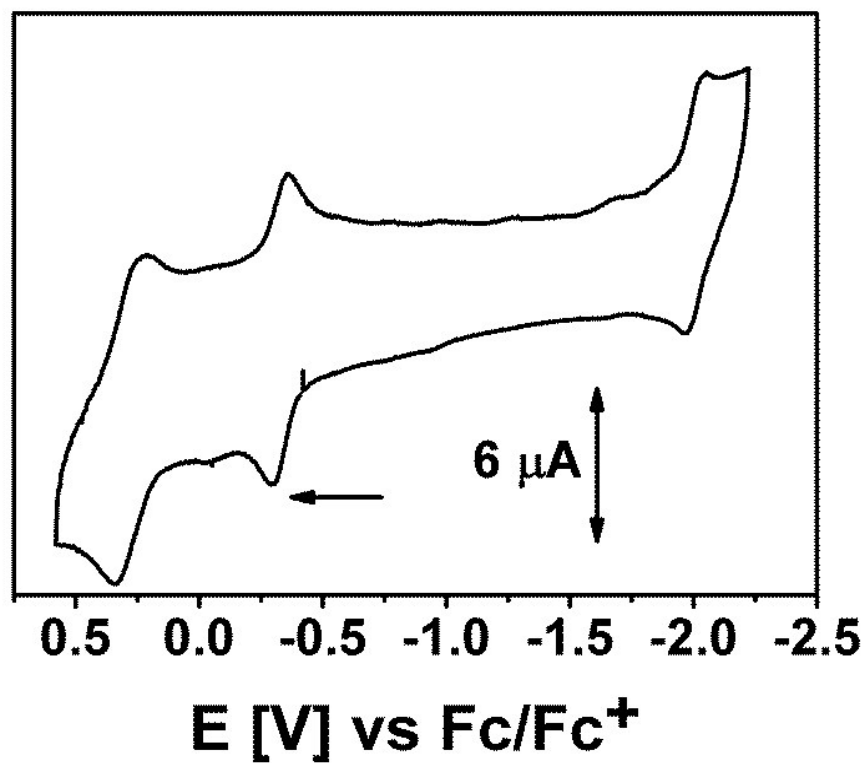

**Figure S14:** Cyclic voltammogram of  $2^{\text{NH,N(Mes)}}$  recorded in  $\text{CD}_3\text{CN}$  (0.1 M  $\text{Bu}_4\text{NPF}_6$ ) at 100 mV/s.



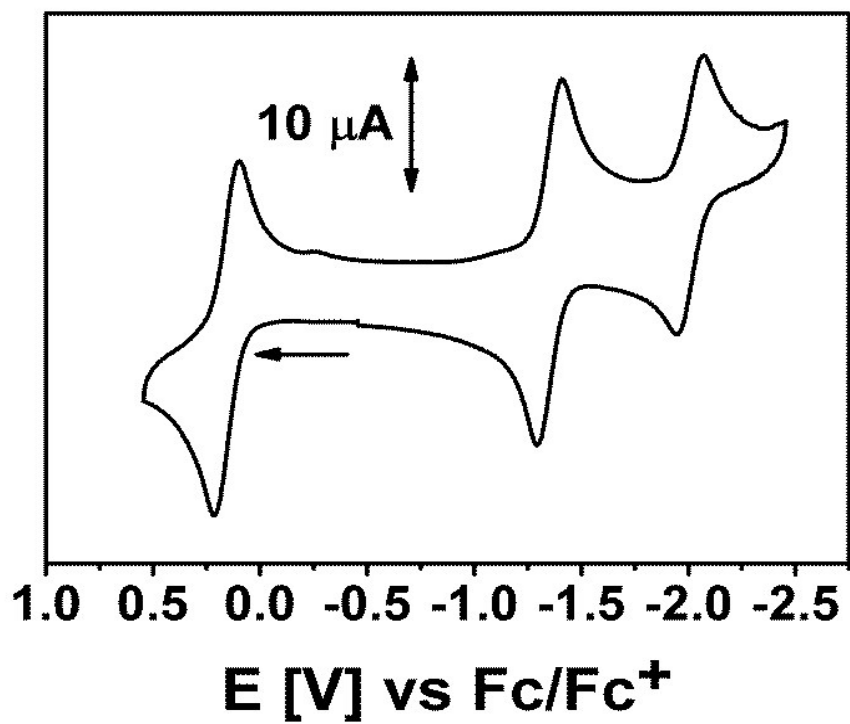

**Figure S15:** Cyclic voltammogram of **mono2b**<sup>O,N(Mes)</sup> recorded in CD<sub>3</sub>CN (0.1 M Bu<sub>4</sub>NPF<sub>6</sub>) at 100 mV/s.

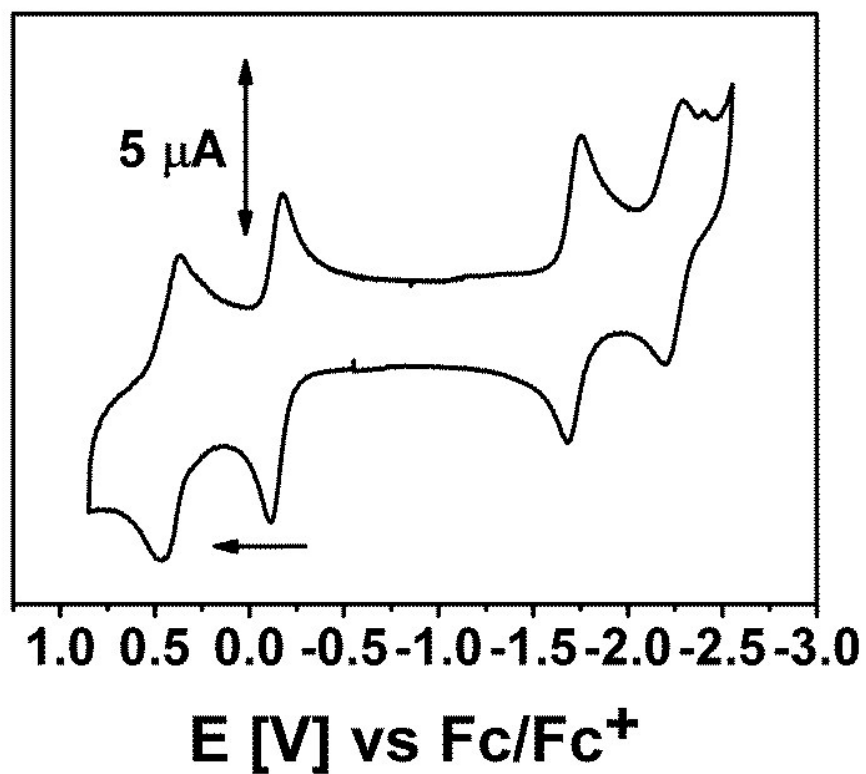

**Figure S16:** Cyclic voltammogram of  $3^{N(\text{PhCF}_3)}$  recorded in  $\text{CD}_3\text{CN}$  (0.1 M  $\text{Bu}_4\text{NPF}_6$ ) at 100 mV/s.

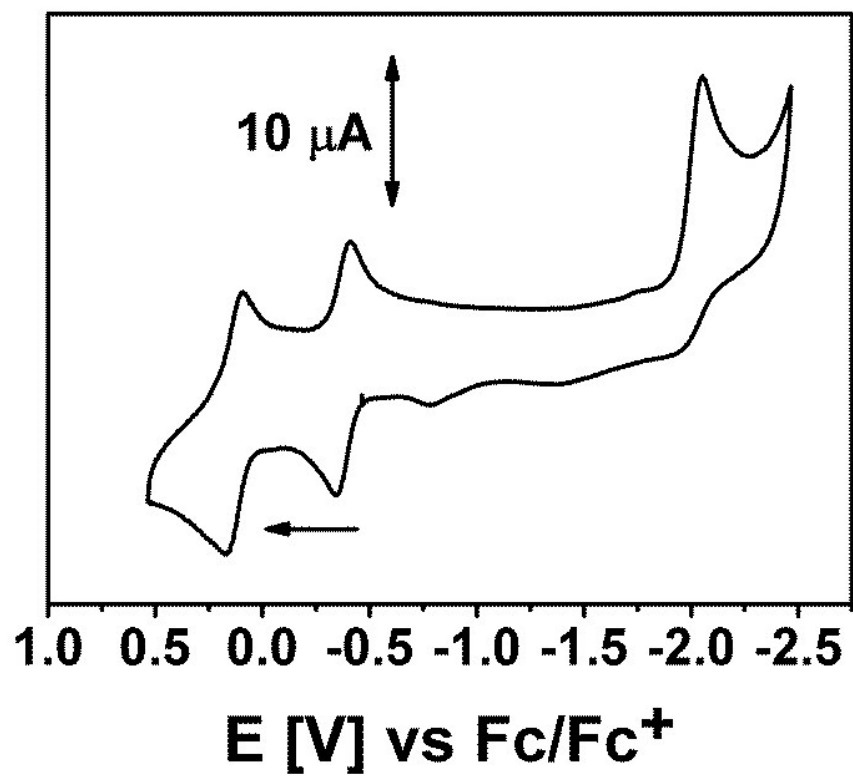

**Figure S17:** Cyclic voltammogram of  $3^{N(iPr)}$  recorded in  $CD_3CN$  (0.1 M  $Bu_4NPF_6$ ) at 100 mV/s.

## EPR Data

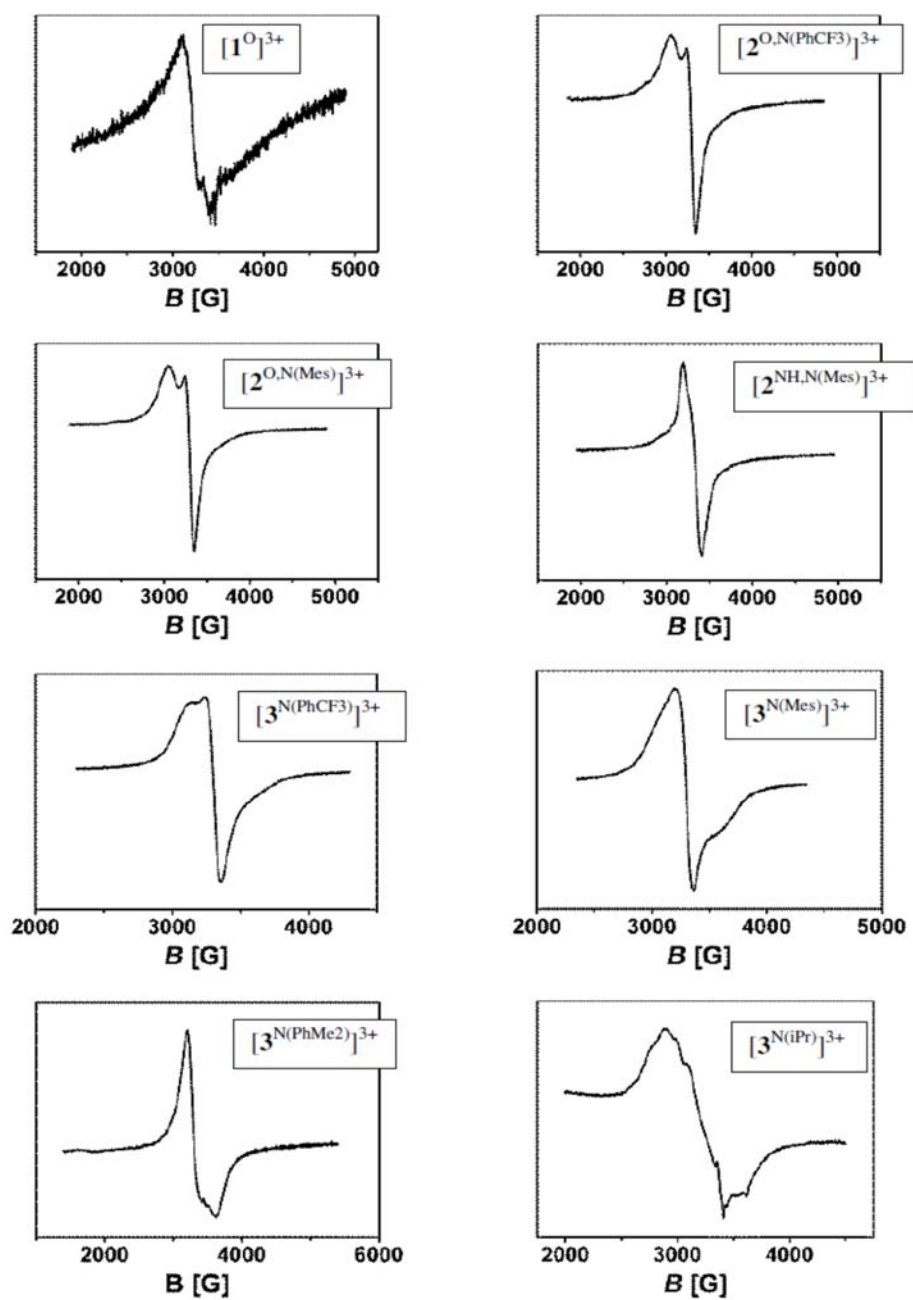

**Figure S18:** EPR spectra of mixed-valent dinuclear complexes recorded in frozen  $CH_3CN$  at 110 K.

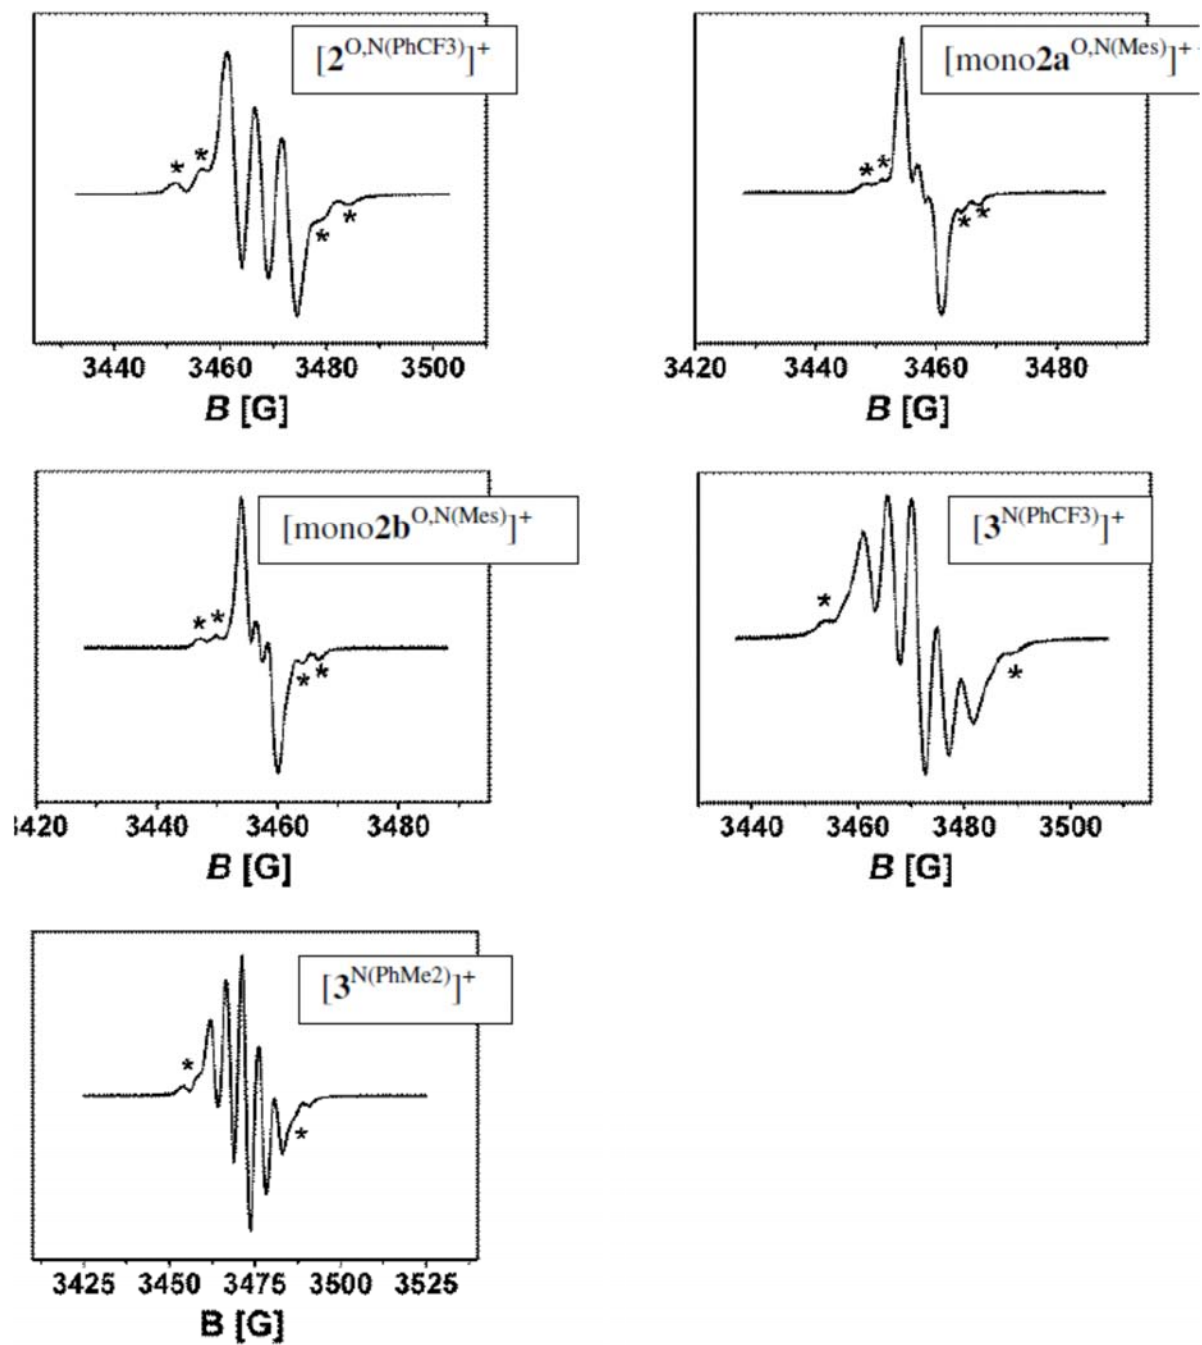

**Figure S19:** (a) EPR spectra of reduced complexes recorded in  $\text{CH}_3\text{CN}$  at room temperature.

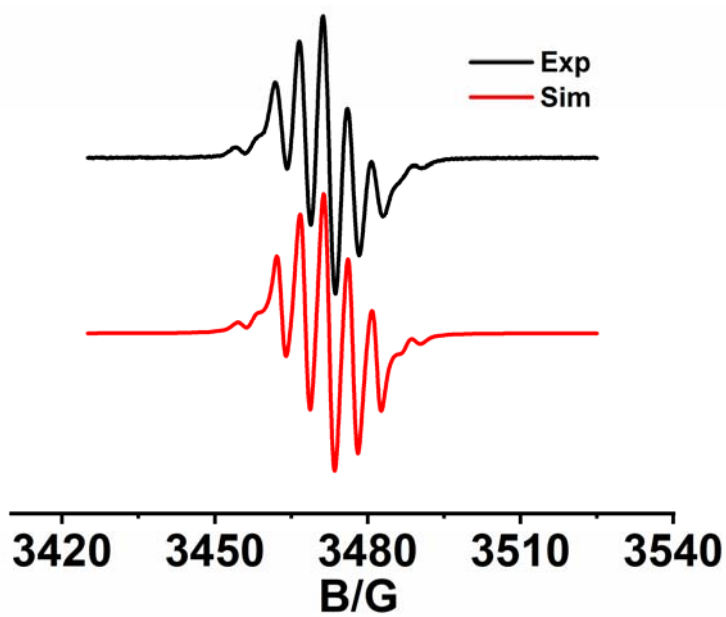

|                        | Simulated parameters of $\mathbf{2}^{\text{NH},\text{N}(\text{Mes})^+}$ |
|------------------------|-------------------------------------------------------------------------|
| $g$                    | 1.9958                                                                  |
| $A(99,101\text{Ru})^*$ | 3.2850                                                                  |
| $A(99,101\text{Ru})^*$ | 2.9473                                                                  |
| $A(14\text{N})^*$      | 4.9607                                                                  |
| $A(14\text{N})^*$      | 4.4088                                                                  |

\* in G

**Figure S19: (b)** EPR simulated spectra of complex  $\mathbf{2}^{\text{NH},\text{N}(\text{Mes})^+}$

## Spectroelectrochemistry Data

**Table S3** UV/Vis–NIR absorption bands of various oxidation states of the complexes discussed in this paper (recorded in CH<sub>3</sub>CN)

| Compound                                                    | $\lambda_{\text{max}}$ [nm] ( $\epsilon$ [ $10^4 \text{ cm}^{-1} \text{ m}^{-1}$ ])                                    |
|-------------------------------------------------------------|------------------------------------------------------------------------------------------------------------------------|
| [ <b>1</b> <sup>O</sup> ] <sup>4+</sup>                     | 298 (0.89), 365 sh, 530 (0.66), 785 (0.23)                                                                             |
| [ <b>1</b> <sup>O</sup> ] <sup>3+</sup>                     | 305 (0.71), 375 (0.73), 780 (1.30), 1865 (0.23)                                                                        |
| [ <b>1</b> <sup>O</sup> ] <sup>2+</sup>                     | 316 (0.79), 437 (0.83), 765 (0.91)                                                                                     |
| [ <b>1</b> <sup>O</sup> ] <sup>+</sup>                      | 340 (0.72), 442 (0.90), 515 sh, 750 (0.35)                                                                             |
| [ <b>1</b> <sup>O</sup> ] <sup>0</sup>                      | 405 sh, 450 sh, 505 (1.15), 800 sh                                                                                     |
| [ <b>2</b> <sup>O,N(PhCF<sub>3</sub>)</sup> ] <sup>4+</sup> | 300 sh, 543 (3.50), 1087 sh                                                                                            |
| [ <b>2</b> <sup>O,N(PhCF<sub>3</sub>)</sup> ] <sup>3+</sup> | 317 (2.26), 371 (2.19), 720 (4.61), 1564 (0.71)                                                                        |
| [ <b>2</b> <sup>O,N(PhCF<sub>3</sub>)</sup> ] <sup>2+</sup> | 325 (2.63), 417 sh, 450 (2.65), 706 (4.15)                                                                             |
| [ <b>2</b> <sup>O,N(Mes)</sup> ] <sup>4+</sup>              | 298 sh, 542 (2.88), 589 (2.36), 1132 sh                                                                                |
| [ <b>2</b> <sup>O,N(Mes)</sup> ] <sup>3+</sup>              | 377 (2.13), 716 (3.49), 1542 (0.69)                                                                                    |
| [ <b>2</b> <sup>O,N(Mes)</sup> ] <sup>2+</sup>              | 323 (2.38), 421 (2.61), 449 sh, 686 (3.62)                                                                             |
| [ <b>2</b> <sup>NH,N(Mes)</sup> ] <sup>4+</sup>             | 306 sh, 471 sh, 580 (4.95), 1126 sh                                                                                    |
| [ <b>2</b> <sup>NH,N(Mes)</sup> ] <sup>3+</sup>             | 371 (2.63), 580 sh, 708 (5.32), 752 sh, 1435 (1.28)                                                                    |
| [ <b>2</b> <sup>NH,N(Mes)</sup> ] <sup>2+</sup>             | 311 (2.63), 376 sh, 422 sh, 479 (2.93), 645 (5.78)                                                                     |
| [mono <b>2</b> <sup>O,N(Mes)</sup> ] <sup>2+</sup>          | A: 304 (1.56), 460 (1.33), 496 sh, 1004 sh<br>B: 305 (1.61), 364 sh, 431 sh, 459 (1.33), 496 sh, 685 sh, 966 sh        |
| [mono <b>2</b> <sup>O,N(Mes)</sup> ] <sup>+</sup>           | A: 327 (1.68), 436 (1.17), 648 (1.18)<br>B: 326 (1.88), 437 (1.22), 639 (1.34)                                         |
| [mono <b>2</b> <sup>O,N(Mes)</sup> ] <sup>0</sup>           | A: 313 (0.99), 353 (0.91), 453 (1.23), 496 (1.27), 669 sh<br>B: 330 (1.01), 355 (1.06), 458 (1.29), 489 (1.29), 659 sh |

---

|                                        |                                                            |
|----------------------------------------|------------------------------------------------------------|
| $[\mathbf{3}^{\text{N(PhCF}_3)}]^{4+}$ | 304 sh, 503 sh, 568 (4.16), 946 sh, 1091 sh                |
| $[\mathbf{3}^{\text{N(PhCF}_3)}]^{3+}$ | 333 (2.17), 392 sh, 729 (6.15), 1248 sh, 1492 (1.47)       |
| $[\mathbf{3}^{\text{N(PhCF}_3)}]^{2+}$ | 332 (2.80), 408 (1.99), 467 (2.26), 699 (5.39)             |
| $[\mathbf{3}^{\text{N(PhCF}_3)}]^+$    | 310 (4.16), 433 (3.05), 790 (4.07)                         |
| $[\mathbf{3}^{\text{N(Mes)}}]^{4+}$    | 310 (1.79), 478 sh, 585 (2.86), 1129 sh                    |
| $[\mathbf{3}^{\text{N(Mes)}}]^{3+}$    | 318 sh, 376 (1.59), 724 (3.59), 850 sh, 1490 (1.35)        |
| $[\mathbf{3}^{\text{N(Mes)}}]^{2+}$    | 320 (1.71), 418 (1.67), 483 (1.89), 680 (3.55)             |
| $[\mathbf{3}^{\text{N(Mes)}}]^+$       | 350 (1.45), 468 (0.23), 780 (1.59), 860 sh                 |
| $[\mathbf{3}^{\text{N(PhMe}_2)}]^{4+}$ | 305 (1.73), 470 sh, 580 (3.15), 1085 sh                    |
| $[\mathbf{3}^{\text{N(PhMe}_2)}]^{3+}$ | 325 (1.53), 374 (1.55), 727 (4.06), 835 sh, 1485 (1.42)    |
| $[\mathbf{3}^{\text{N(PhMe}_2)}]^{2+}$ | 324 (1.91), 410 sh, 485 (1.92), 685 (3.86)                 |
| $[\mathbf{3}^{\text{N(PhMe}_2)}]^+$    | 348 (1.66), 473 (2.53), 578 (1.51), 740 (1.92), 795 (1.86) |
| $[\mathbf{3}^{\text{N(iPr)}}]^{4+}$    | 301 sh, 483 sh, 549 (3.50), 1039 sh                        |
| $[\mathbf{3}^{\text{N(iPr)}}]^{3+}$    | 321 sh, 371 (2.95), 709 (4.41), 811 sh, 1403 (1.40)        |
| $[\mathbf{3}^{\text{N(iPr)}}]^{2+}$    | 324 (2.89), 416 (3.04), 480 (2.72), 643 (5.55)             |

---



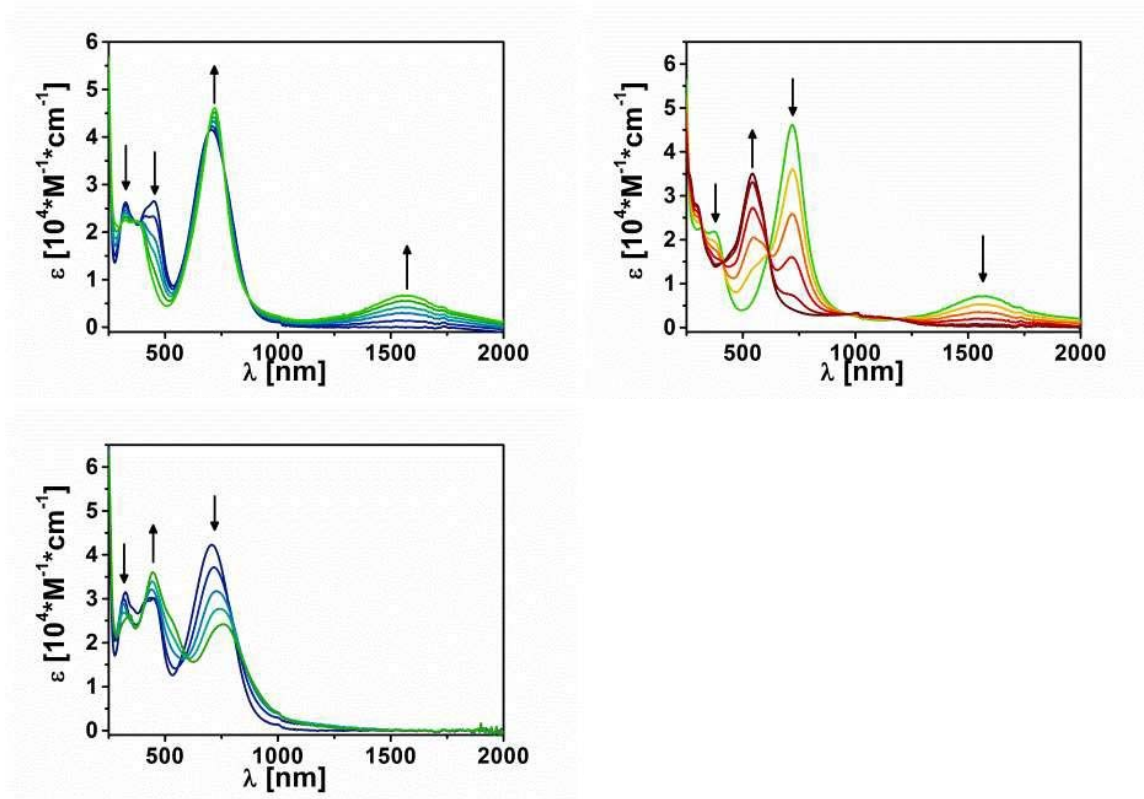

**Figure S20:** Changes in the UV/Vis–NIR spectrum of  $[2^{O,N(\text{PhCF}_3)}]^{2+}$ , observed upon oxidation to  $[2^{O,N(\text{PhCF}_3)}]^{3+}$  (top left) and  $[2^{O,N(\text{PhCF}_3)}]^{4+}$  (top right) and upon reduction to  $[2^{O,N(\text{PhCF}_3)}]^{+}$  (bottom left) in acetonitrile (scan rate of 20 mV/s).

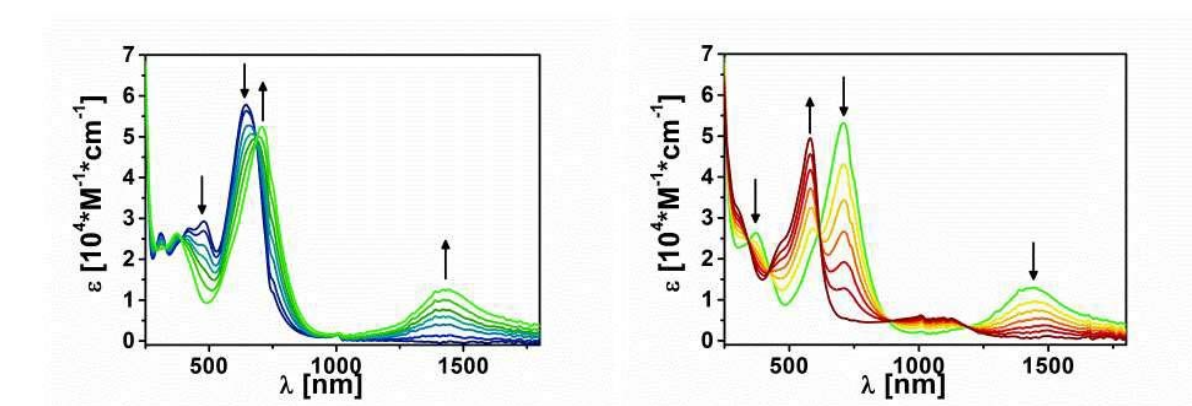

**Figure S21:** Changes in the UV/Vis–NIR spectrum of  $[2^{\text{NH},\text{N}(\text{Mes})}]^{2+}$ , observed upon oxidation to  $[2^{\text{NH},\text{N}(\text{Mes})}]^{3+}$  (left) and  $[2^{\text{O},\text{N}(\text{Mes})}]^{4+}$  (right) in acetonitrile (scan rate of 20 mV/s).

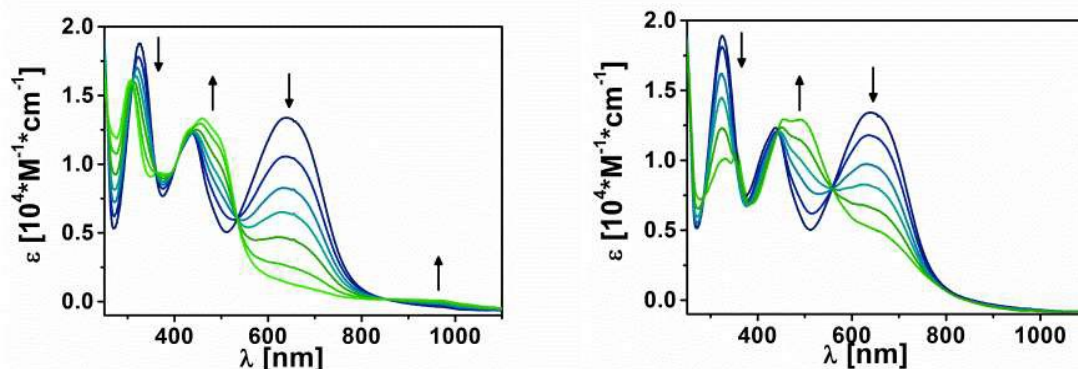

**Figure S22:** Changes in the UV/Vis–NIR spectrum of  $[\text{mono2b}^{\text{O,N(Mes)}}]^+$ , observed upon oxidation to  $[\text{mono2b}^{\text{O,N(Mes)}}]^{2+}$  (left) and reduction to  $[\text{mono2b}^{\text{O,N(Mes)}}]^0$  (right) in acetonitrile (scan rate of 20 mV/s).

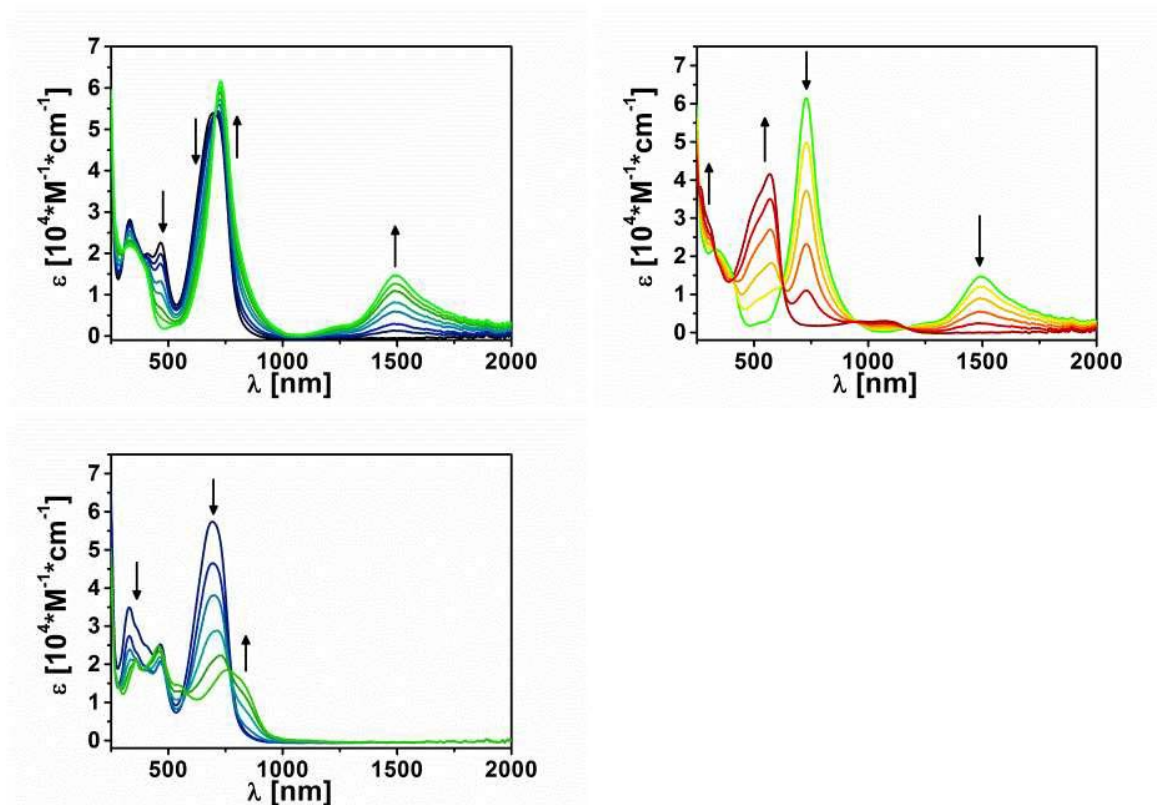

**Figure S23:** Changes in the UV/Vis–NIR spectrum of  $[\mathbf{3}^{\text{N(PhCF}_3\text{)}}]^{2+}$ , observed upon oxidation to  $[\mathbf{3}^{\text{N(PhCF}_3\text{)}}]^{3+}$  (top left) and  $[\mathbf{3}^{\text{N(PhCF}_3\text{)}}]^{4+}$  (top right) and upon reduction to  $[\mathbf{3}^{\text{N(PhCF}_3\text{)}}]^+$  (bottom left) in acetonitrile (scan rate of 20 mV/s).

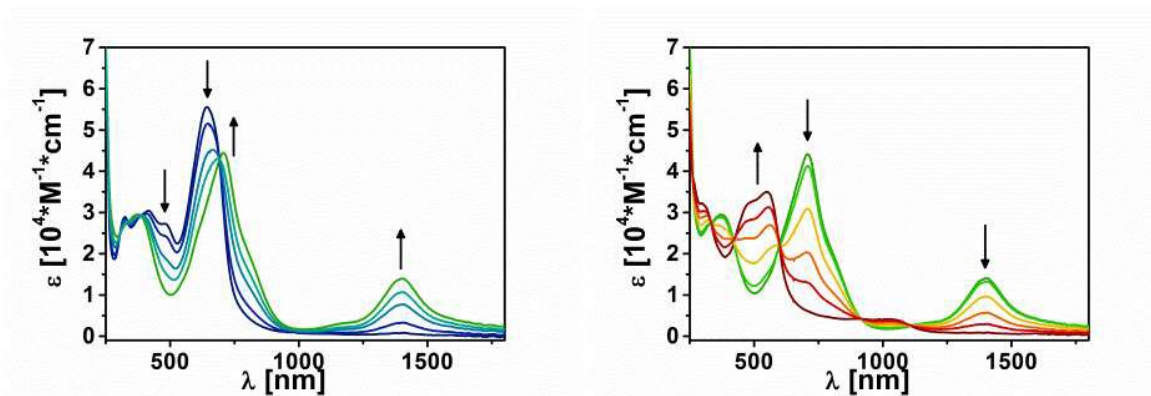

**Figure S24:** Changes in the UV/Vis–NIR spectrum of  $[3^{\text{N(iPr)}}]^{2+}$ , observed upon oxidation to  $[3^{\text{N(iPr)}}]^{3+}$  (left) and  $[3^{\text{N(iPr)}}]^{4+}$  (right) in acetonitrile (scan rate of 20 mV/s).

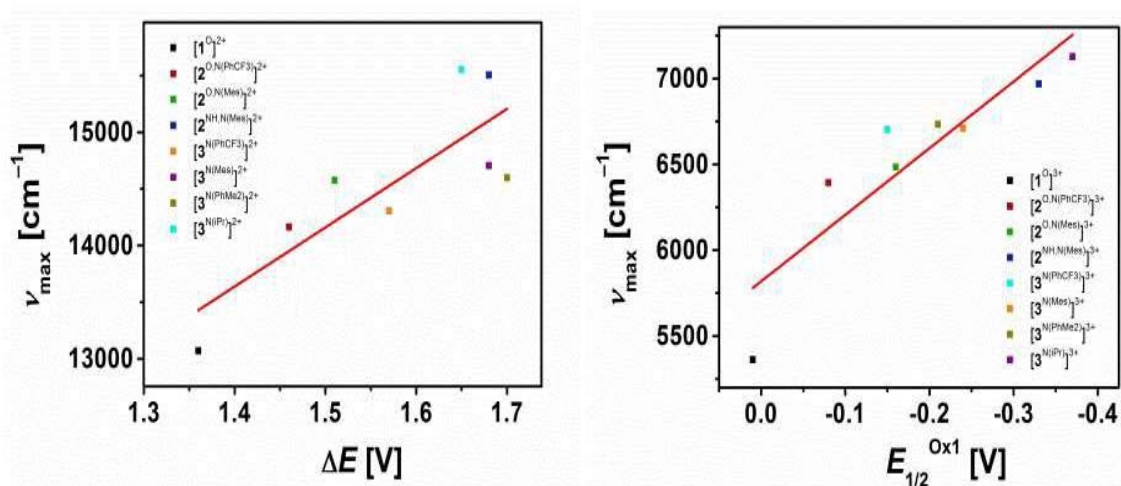

**Figure S25:** Left:  $\nu_{\text{max}}$  of the MLCT bands of the native dinuclear species plotted against the potential gap between first oxidation and first reduction determined by cyclic voltammetry. Right:  $\nu_{\text{max}}$  of the NIR bands of the mono-oxidized mixed-valent species plotted against the potential of the first oxidation.

## DFT Calculations

**Table S4** Bond lengths of the DFT-optimized geometries Of  $3^{N(\text{Mes})}$  and  $2^{NH,N(\text{Mes})}$  in different oxidation states (See Figure 11 for atom labeling).

| Bond                      | Exp.<br>[ $3^{N(\text{Mes})}$ ] <sup>2+</sup> | DFT<br>$3^{N(\text{Mes})}$ |       |       |       | DFT<br>$2^{NH,N(\text{Mes})}$ |       |       |       |
|---------------------------|-----------------------------------------------|----------------------------|-------|-------|-------|-------------------------------|-------|-------|-------|
|                           |                                               | 2+                         | 3+    | 4+    | +     | 2+                            | 3+    | 4+    | +     |
| Ru1–N10 <sub>ax</sub>     | 2.044(4)                                      | 2.039                      | 2.053 | 2.060 | 2.029 | 2.039                         | 2.051 | 2.061 | 2.031 |
| Ru1–N11 <sub>ax</sub>     | 2.063(4)                                      | 2.054                      | 2.062 | 2.069 | 2.050 | 2.053                         | 2.062 | 2.069 | 2.049 |
| Ru1–N12 <sub>eq</sub>     | 2.034(4)                                      | 2.039                      | 2.054 | 2.063 | 2.035 | 2.038                         | 2.053 | 2.064 | 2.035 |
| Ru1–N13 <sub>amine</sub>  | 2.074(4)                                      | 2.093                      | 2.096 | 2.108 | 2.095 | 2.093                         | 2.102 | 2.107 | 2.095 |
| Ru1–N14 <sub>Mes</sub>    | 2.097(4)                                      | 2.083                      | 2.072 | 2.045 | 2.079 | 2.085                         | 2.088 | 2.044 | 2.079 |
| Ru1–O1                    | 2.076(3)                                      | 2.068                      | 2.032 | 2.003 | 2.081 | 2.070                         | 2.010 | 2.006 | 2.083 |
| N14 <sub>Mes</sub> –C1    | 1.330(5)                                      | 1.339                      | 1.337 | 1.340 | 1.362 | 1.338                         | 1.336 | 1.340 | 1.362 |
| C1–C2                     | 1.417(6)                                      | 1.410                      | 1.412 | 1.410 | 1.413 | 1.411                         | 1.411 | 1.411 | 1.413 |
| C2–C3                     | 1.375(6)                                      | 1.392                      | 1.390 | 1.389 | 1.399 | 1.392                         | 1.390 | 1.389 | 1.398 |
| C3–O1 <sup>i</sup> /O2    | 1.305(5)                                      | 1.304                      | 1.307 | 1.308 | 1.326 | 1.305                         | 1.305 | 1.308 | 1.328 |
| C1 <sup>i</sup> –C3/C3–C4 | 1.481(6)                                      | 1.476                      | 1.471 | 1.467 | 1.450 | 1.482                         | 1.478 | 1.473 | 1.455 |
| Ru2–N20 <sub>ax</sub>     |                                               |                            |       |       |       | 2.040                         | 2.057 | 2.064 | 2.029 |
| Ru2–N21 <sub>ax</sub>     |                                               |                            |       |       |       | 2.049                         | 2.059 | 2.066 | 2.045 |
| Ru2–N22 <sub>eq</sub>     |                                               |                            |       |       |       | 2.039                         | 2.056 | 2.060 | 2.037 |
| Ru2–N23 <sub>amine</sub>  |                                               |                            |       |       |       | 2.079                         | 2.077 | 2.088 | 2.080 |
| Ru2–N24 <sub>H</sub>      |                                               |                            |       |       |       | 2.044                         | 2.000 | 2.002 | 2.040 |
| Ru2–O2                    |                                               |                            |       |       |       | 2.080                         | 2.077 | 2.015 | 2.090 |
| N24 <sub>H</sub> –C4      |                                               |                            |       |       |       | 1.332                         | 1.334 | 1.332 | 1.356 |
| C4–C5                     |                                               |                            |       |       |       | 1.413                         | 1.411 | 1.411 | 1.415 |
| C5–C6                     |                                               |                            |       |       |       | 1.391                         | 1.390 | 1.389 | 1.399 |
| C6–O1                     |                                               |                            |       |       |       | 1.305                         | 1.309 | 1.308 | 1.326 |
| C1–C6                     |                                               |                            |       |       |       | 1.478                         | 1.472 | 1.469 | 1.451 |

**Table S5** Calculated and experimental transition energies for different oxidation states of  $3^{\text{N(Mes)}}$  and  $2^{\text{NH,N(Mes)}}$ .

| Compound                                         | Main contributing excitation (%)          | Calcd. transition energy [nm]                        | Oscillator Strength | Exp. transition energ[nm] ( $e/10^4 \text{ cm}^{-1} \text{ m}^{-1}$ ) | Character of the transition <sup>a</sup> |
|--------------------------------------------------|-------------------------------------------|------------------------------------------------------|---------------------|-----------------------------------------------------------------------|------------------------------------------|
| $[3^{\text{N(Mes)}}]^{2+}$                       | HOMO-2→LUMO ( $\lambda_3$ )               | 640.6                                                | 0.0584              | 680 (3.55)                                                            | Ru→Q                                     |
|                                                  | HOMO-1→LUMO+1 (54)                        | 519.8                                                | 0.1583              | 483 (1.89)                                                            | Ru→Q→TPA                                 |
|                                                  | HOMO→LUMO +2 (35)                         |                                                      |                     |                                                                       | RuQ→TPA                                  |
|                                                  | HOMO → LUMO +8(77)                        | 429.1                                                | 0.0284              | 418 (1.67)                                                            | Ru-Q→TPA                                 |
|                                                  | HOMO-5→LUMO +7 (21)                       | 323.4                                                | 0.0129              | 320 (1.71)                                                            | Ru→TPA                                   |
|                                                  | HOMO-4→LUMO +8 (28)                       |                                                      |                     |                                                                       | Ru→TPA                                   |
|                                                  | HOMO-3→LUMO +7 (24)                       |                                                      |                     |                                                                       | Ru→TPA                                   |
|                                                  | $[3^{\text{N(Mes)}}]^{3+}$                | HOMO-2( $\beta$ )→LUMO ( $\beta$ ) (85)              | 1081.6              | 0.2787                                                                | 1490 (1.35)                              |
| HOMO-5( $\beta$ )→LUMO ( $\beta$ ) (63)          |                                           | 770.4                                                | 0.0126              | 724 (3.59)                                                            | Mixed                                    |
| HOMO-2( $\beta$ )→LUMO +3( $\beta$ )             |                                           | 377.9                                                | 0.0213              | 376 (1.59)                                                            | Ru→TPA                                   |
| HOMO-1( $\beta$ )→LUMO +6( $\beta$ ) (20)        |                                           | 337.6                                                | 0.0115              | 318 (sh)                                                              | Ru-Q→TPA                                 |
| $[3^{\text{N(Mes)}}]^{4+}$                       |                                           | HOMO ( $\alpha$ )→LUMO ( $\alpha$ ) (32)             | 927.6               | 0.0486                                                                | 1129 (sh)                                |
|                                                  | HOMO-6( $\beta$ )→LUMO +1( $\beta$ ) (33) | 585.3                                                | 0.1602              | 585 (2.86)                                                            | Ru-Q→Ru                                  |
|                                                  | HOMO ( $\beta$ )→LUMO +2( $\beta$ ) (27)  |                                                      |                     |                                                                       | Ru→Q                                     |
|                                                  | HOMO-13( $\beta$ )→LUMO ( $\beta$ ) (50)  | 476.3                                                | 0.0618              | 478 (sh)                                                              | TPA→Ru-Q                                 |
|                                                  | HOMO-12( $\beta$ )→LUMO ( $\beta$ ) (22)  |                                                      |                     |                                                                       | TPA→Ru-Q                                 |
|                                                  | $[3^{\text{N(Mes)}}]^{+}$                 | HOMO ( $\alpha$ )→LUMO +8( $\alpha$ ) (8 $\lambda$ ) | 823.2               | 0.0027                                                                | 860 (sh)                                 |
| HOMO ( $\beta$ )→LUMO ( $\beta$ ) (7 $\lambda$ ) |                                           | 742.1                                                | 0.0954              | 780 (1.59)                                                            | Ru-Q→TPA                                 |
| HOMO-5( $\beta$ )→LUMO +1( $\beta$ ) (36)        |                                           | 463.2                                                | 0.0260              | 468 (0.23)                                                            | Ru→TPA                                   |
| HOMO-6( $\alpha$ )→LUMO ( $\alpha$ ) (53)        |                                           | 422.0                                                | 0.1144              | 350 (1.45)                                                            | Ru→TPA                                   |
| $[2^{\text{NH,N(Mes)}}]^{2+}$                    |                                           | HOMO-1→LUMO ( $\lambda_4$ )                          | 726.5               | 0.0028                                                                | 763 (sh)                                 |
|                                                  | HOMO-2→LUMO ( $\lambda_2$ )               | 636.8                                                | 0.0656              | 645 (5.78)                                                            | Ru→Q                                     |
|                                                  | HOMO →LUMO +4 (42)                        | 480.6                                                | 0.0117              | 479 (2.93)                                                            | Ru-Q→TPA                                 |
|                                                  | HOMO-3→LUMO +2 (47)                       | 423.0                                                | 0.0575              | 422 (sh)                                                              | Ru→TPA                                   |
|                                                  | HOMO-3→LUMO +7 (22)                       | 375.0                                                | 0.0036              | 376 (sh)                                                              | Ru→TPA                                   |
|                                                  | HOMO-2→LUMO +5 (40)                       |                                                      |                     |                                                                       | Ru→TPA                                   |
|                                                  | HOMO-8→LUMO +1 (35)                       | 307.5                                                | 0.0276              | 311 (2.63)                                                            | Mes→TPA                                  |

|                               |                                                     |        |        |             |             |
|-------------------------------|-----------------------------------------------------|--------|--------|-------------|-------------|
|                               | HOMO-6 → LUMO +3 (37)                               |        |        |             | Ru-Q → TPA  |
| $[2^{\text{NH,N(Mes)}}]^{3+}$ | HOMO-1( $\beta$ ) → LUMO ( $\beta$ ) (58)           | 1065.3 | 0.2594 | 1435 (1.28) | Ru-Q → Ru-Q |
|                               | HOMO-5( $\beta$ ) → LUMO ( $\beta$ ) (5 $\lambda$ ) | 737.7  | 0.0070 | 708 (5.32)  | Ru-Q → Ru-Q |
|                               | HOMO ( $\beta$ ) → LUMO +10( $\beta$ ) (58)         | 370.0  | 0.0074 | 371 (2.63)  | Ru-Q → TPA  |
| $[2^{\text{NH,N(Me)}}]^{4+}$  | HOMO ( $\alpha$ ) → LUMO ( $\alpha$ ) (33)          | 895.9  | 0.0599 | 1126 (sh)   | Ru-Q → Q    |
|                               | HOMO-4( $\beta$ ) → LUMO +1( $\beta$ ) (27)         | 585.0  | 0.1471 | 580 (4.95)  | Ru-Q → Ru-Q |
|                               | HOMO → LUMO +2( $\beta$ ) (35)                      |        |        |             | Ru → Ru-Q   |
|                               | HOMO-11( $\beta$ ) → LUMO ( $\beta$ ) (20)          | 469.2  | 0.2155 | 471 (sh)    | TPA → Ru-Q  |

<sup>a</sup>Q = quinone; Mes = mesityl

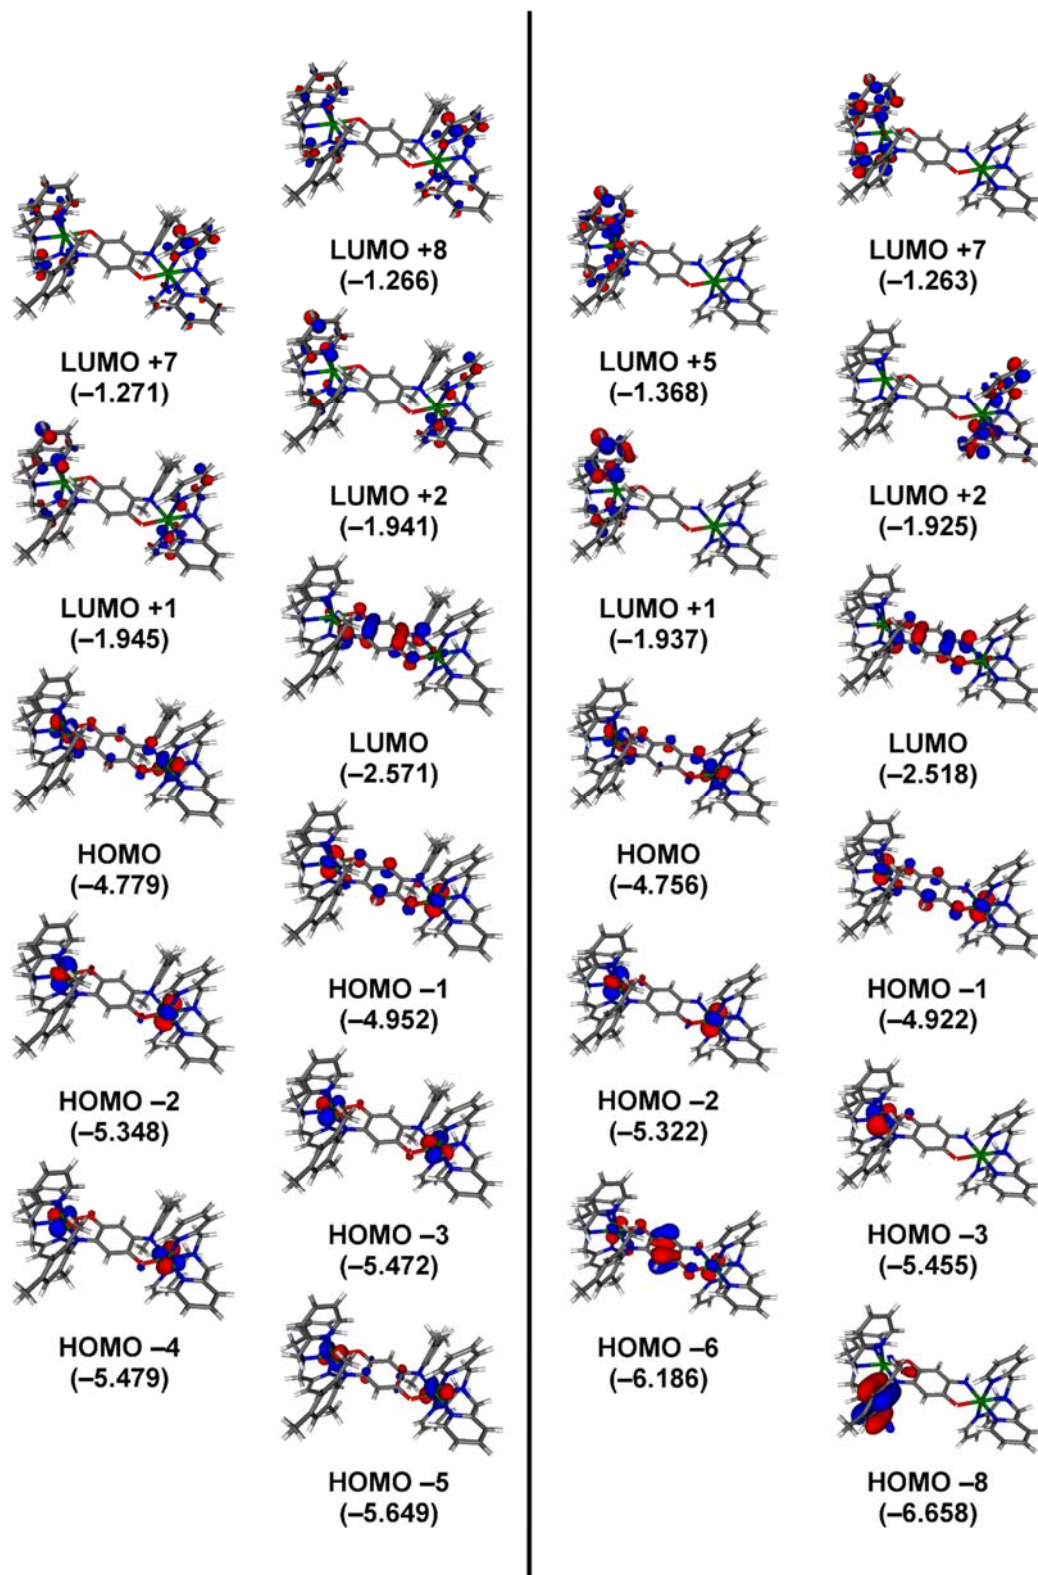

**Figure S26:** Calculated molecular orbitals of  $[3^{\text{N(Mes)}}]^{2+}$  (left) and  $[2^{\text{NH,N(Mes)}}]^{2+}$  (right). Orbital energies (in eV) are given in parentheses.

**Table S6** Atomic coordinates of the optimised geometry of  $[3^{N(\text{Mes})}]^{2+}$ .

|    |                   |                   |                   |    |                   |                  |                   |
|----|-------------------|-------------------|-------------------|----|-------------------|------------------|-------------------|
| Ru | 2.36455422707026  | 5.40917945817707  | 7.52891326578441  | H  | 3.82879927387302  | 9.83181097763899 | 5.36307244590164  |
| O  | 0.90342497984703  | 6.83122555401484  | 7.87212326092627  | C  | 3.32071153857601  | 8.00178021735201 | 6.36054026757049  |
| N  | 0.81774812898506  | 4.27491825215283  | 8.34173071990938  | H  | 2.36239202315674  | 8.33801319206077 | 6.75512833627333  |
| N  | 3.92545489534924  | 4.08251206004675  | 7.09852639518989  | C  | 3.41796828052166  | 3.21168403544115 | 6.00078626884117  |
| N  | 3.65948181570446  | 6.72804343333323  | 6.66872202991270  | H  | 2.78736370152037  | 2.44333851586019 | 6.47262718783947  |
| N  | 1.82846218287221  | 5.01082012651856  | 5.60231280686115  | H  | 4.23846235072529  | 2.69986267345454 | 5.47618673406757  |
| N  | 3.34465275572129  | 5.43719322322291  | 9.33351976315792  | C  | 2.56994620026224  | 4.00796059156702 | 5.04231357539773  |
| C  | -0.23952013319418 | 6.38444470934418  | 8.31433976092895  | C  | 2.47017503364230  | 3.70790331226118 | 3.68950613310421  |
| C  | -1.34612813354788 | 7.19839102940884  | 8.53930951282347  | H  | 3.08486198327162  | 2.91220198094709 | 3.26936046510509  |
| H  | -1.28469446390487 | 8.26612627043437  | 8.32983746523047  | C  | 1.57246563229886  | 4.42327029242053 | 2.89071577465823  |
| C  | -0.31629241452177 | 4.93798541340229  | 8.59947130136825  | H  | 1.47739556813406  | 4.19477879688214 | 1.82955560500940  |
| C  | 0.90603420979434  | 2.89516283356768  | 8.68138696011976  | C  | 0.80894333144059  | 5.43529719836352 | 3.47379250422116  |
| C  | 0.68064116518975  | 1.91140911031005  | 7.69552809730135  | H  | 0.10045781653233  | 6.02004466571802 | 2.88850035381048  |
| C  | 0.97920866745521  | 0.57624473356860  | 7.99819701019475  | C  | 0.97065508976144  | 5.70930512625608 | 4.82839671410094  |
| H  | 0.82916584362714  | -0.18249898198911 | 7.22536270526082  | H  | 0.41810884416656  | 6.49947251231028 | 5.33548787867064  |
| C  | 1.45048970194214  | 0.18852999086650  | 9.25735294273611  | C  | 4.19744153311507  | 3.36546261039499 | 8.37700591083078  |
| C  | 1.56784424225126  | 1.17437368252788  | 10.24537039048523 | H  | 5.15048213041102  | 2.81529337723756 | 8.34500316710684  |
| H  | 1.89194721975005  | 0.88947766690151  | 11.25008140991874 | H  | 3.38496847936297  | 2.64159582017535 | 8.52899101843097  |
| C  | 1.28340395736229  | 2.52103138527499  | 9.99123985725022  | C  | 4.18994410460838  | 4.37491055774004 | 9.49984901151377  |
| C  | 0.06743612409472  | 2.25662055367276  | 6.36239253189978  | C  | 4.96840674058645  | 4.24464867188473 | 10.64226809070639 |
| H  | 0.63840230915215  | 1.82877091140695  | 5.52606910232387  | H  | 5.64019798818638  | 3.39219370009835 | 10.73977221225043 |
| H  | -0.00793453931750 | 3.33827624660932  | 6.21871082186811  | C  | 4.87496420728237  | 5.20785453904491 | 11.65243024807129 |
| H  | -0.94894101040605 | 1.83867165955010  | 6.30164730571912  | H  | 5.47280387680207  | 5.11483662830421 | 12.55865236710944 |
| C  | 1.76962506158915  | -1.25309225747318 | 9.56029068565112  | C  | 4.01288585448144  | 6.28941682899835 | 11.47393265358357 |
| H  | 2.67148643347067  | -1.33992622402550 | 10.18261226051380 | H  | 3.91159866924099  | 7.06556875392703 | 12.23132750303010 |
| H  | 1.92682798329191  | -1.82853196732550 | 8.63837671791132  | C  | 3.26846568069020  | 6.37446661409028 | 10.30093348869019 |
| H  | 0.94605537779989  | -1.73110524296510 | 10.11443436560600 | H  | 2.57738275124754  | 7.19442461506905 | 10.10878286073972 |
| C  | 1.35369741292337  | 3.51961054435546  | 11.11700448718715 | C  | -2.53389787466561 | 6.63686159896264 | 9.05162631272772  |
| H  | 1.24719967177626  | 4.54748980681886  | 10.76027149441018 | C  | -1.50400625116741 | 4.37648895791763 | 9.11193970770782  |
| H  | 2.30147738103075  | 3.43662268217322  | 11.66660859765753 | N  | -3.66797711699262 | 7.29989224573432 | 9.30936926953497  |
| H  | 0.54260810337153  | 3.33058203336699  | 11.83664963765613 | C  | -2.61057417066926 | 5.19044690552129 | 9.33700377208811  |
| C  | 5.15800570863815  | 4.84184207827451  | 6.67877495261681  | H  | -1.56539633665308 | 3.30878233565523 | 9.32156857140914  |
| H  | 5.80611215830126  | 4.93010706139458  | 7.56253999807324  | Ru | -5.21477141770761 | 6.16566689931224 | 10.12216911172191 |
| H  | 5.71826601182537  | 4.27082949506706  | 5.92641932364614  | C  | -3.75623166641919 | 8.67980123888501 | 8.97042747881717  |
| C  | 4.83143078168157  | 6.22320148092896  | 6.20231941218944  | O  | -3.75335494759588 | 4.74373681346769 | 9.77972611079830  |
| C  | 5.68479237825881  | 6.97773477393950  | 5.40227407738308  | N  | -6.77605515383179 | 7.49227095521381 | 10.55125420524752 |
| H  | 6.61002096749007  | 6.53491709014757  | 5.03381503586391  | N  | -6.50956809529208 | 4.84708230106512 | 10.98296982547366 |
| C  | 5.33946567482315  | 8.29302862624609  | 5.08831873186094  | N  | -4.67928157001597 | 6.56531777678873 | 12.04867409671567 |
| H  | 5.99351524073978  | 8.90097232059329  | 4.46374850138984  | N  | -6.19418360597400 | 6.13646623550947 | 8.31724295236431  |
| C  | 4.13926137062288  | 8.81138720446604  | 5.58386551648914  | C  | -6.26905149916007 | 8.36385296240153 | 11.64864667180122 |



|   |                   |                   |                   |   |                   |                   |                   |
|---|-------------------|-------------------|-------------------|---|-------------------|-------------------|-------------------|
| C | -5.42127254698376 | 7.56824189951355  | 12.60787621837565 | H | -3.49226961821966 | 9.74189185074954  | 12.12669458644964 |
| C | -7.04760311907497 | 8.20859845515076  | 9.27226250813290  | H | -2.84171057507949 | 8.23505579671709  | 11.43239821646917 |
| C | -7.03936624197991 | 7.19865601756582  | 8.14986639540775  | H | -1.90384375979439 | 9.73696404246290  | 11.35333004500575 |
| C | -3.53126735081677 | 9.66292078605000  | 9.95699683423832  | H | -4.74288705059991 | 10.68700849841299 | 6.40314877065207  |
| C | -4.13403589668564 | 9.05467166590182  | 7.66089952482639  | H | -4.09968562679469 | 7.02847531102256  | 6.89105016497619  |
| C | -8.00859442255906 | 6.73288083661336  | 10.97104621378802 | H | -5.15271194143574 | 8.14074432838270  | 5.98497906573341  |
| C | -7.68172608791756 | 5.35200743591656  | 11.44878253739177 | H | -3.39367039614471 | 8.24515328638025  | 5.81533298430791  |
| C | -6.17031175872547 | 3.57382183950854  | 11.29257751595889 | C | -5.32232763801127 | 7.86881294568625  | 13.96062871790224 |
| C | -6.11724264655453 | 5.19882056381359  | 7.35026125812505  | H | -8.48854493627901 | 8.18096889362091  | 6.90841910672046  |
| C | -3.82975492548467 | 10.99827950348931 | 9.65507726888450  | C | -7.72259169845162 | 6.36493967574584  | 5.99700976418059  |
| C | -2.91916335094724 | 9.31680065374233  | 11.29040798538420 | H | -9.46027678807648 | 5.04084451665216  | 12.61753846984959 |
| C | -4.41845497668714 | 10.40148122261995 | 7.40757461270144  | C | -8.18892928317680 | 3.28325587939130  | 12.56516773194641 |
| C | -4.20510504266041 | 8.05661115405943  | 6.53472570191787  | H | -6.67763608041607 | 1.74477936056521  | 12.29228583869090 |
| H | -5.63843841987160 | 9.13199034832709  | 11.17646230091261 | H | -6.75873175382231 | 4.50707917077605  | 5.41948023496749  |
| H | -7.08978046088994 | 8.87587471158977  | 12.17267412612176 | C | -4.62024030328610 | 12.82855300451733 | 8.09409922011347  |
| H | -8.00071761201953 | 8.75867706497328  | 9.30358256551536  | H | -8.84264243483805 | 2.67576383768940  | 13.19051891615122 |
| H | -6.23515079118362 | 8.93252055005389  | 9.12028186139961  | H | -8.31969905232728 | 6.45772884051947  | 5.09027772372593  |
| C | -7.81689102327028 | 7.32850297501768  | 7.00676063494095  | C | -3.82164402158823 | 5.86743753529907  | 12.82329571336802 |
| H | -8.65627233582261 | 6.64370829662376  | 10.08706120842561 | H | -5.93747582881735 | 8.66449982975286  | 14.38011801406218 |
| H | -8.56931443088875 | 7.30430120865675  | 11.72274908851044 | C | -4.42495667418224 | 7.15390336656866  | 14.76021233532261 |
| C | -8.53482327587860 | 4.59802858147768  | 12.24963269835166 | C | -3.66082293662719 | 6.14188768435065  | 14.17792015929630 |
| C | -6.98848563034121 | 2.76482253939148  | 12.07027438287228 | H | -3.26844826935592 | 5.07733399117245  | 12.31683235268468 |
| H | -5.21178264876615 | 3.23758666088854  | 10.89852546442453 | H | -4.33064207475711 | 7.38280667895572  | 15.82134651905867 |
| C | -6.86066389961868 | 5.28343422071422  | 6.17659493278538  | H | -2.95244338832467 | 5.55759985844580  | 14.76381542388287 |
| H | -5.42629604913320 | 4.37894799068966  | 7.54324048811483  | H | -5.52255411000051 | 12.91568299065231 | 7.47247351158227  |
| H | -3.67993646660130 | 11.75658027519642 | 10.42839128872734 | H | -4.77682951833427 | 13.40353265592232 | 9.01640550312002  |
| C | -4.30092635287338 | 11.38677873580186 | 8.39613193144765  | H | -3.79705490368721 | 13.30681711600206 | 7.53959728577814  |

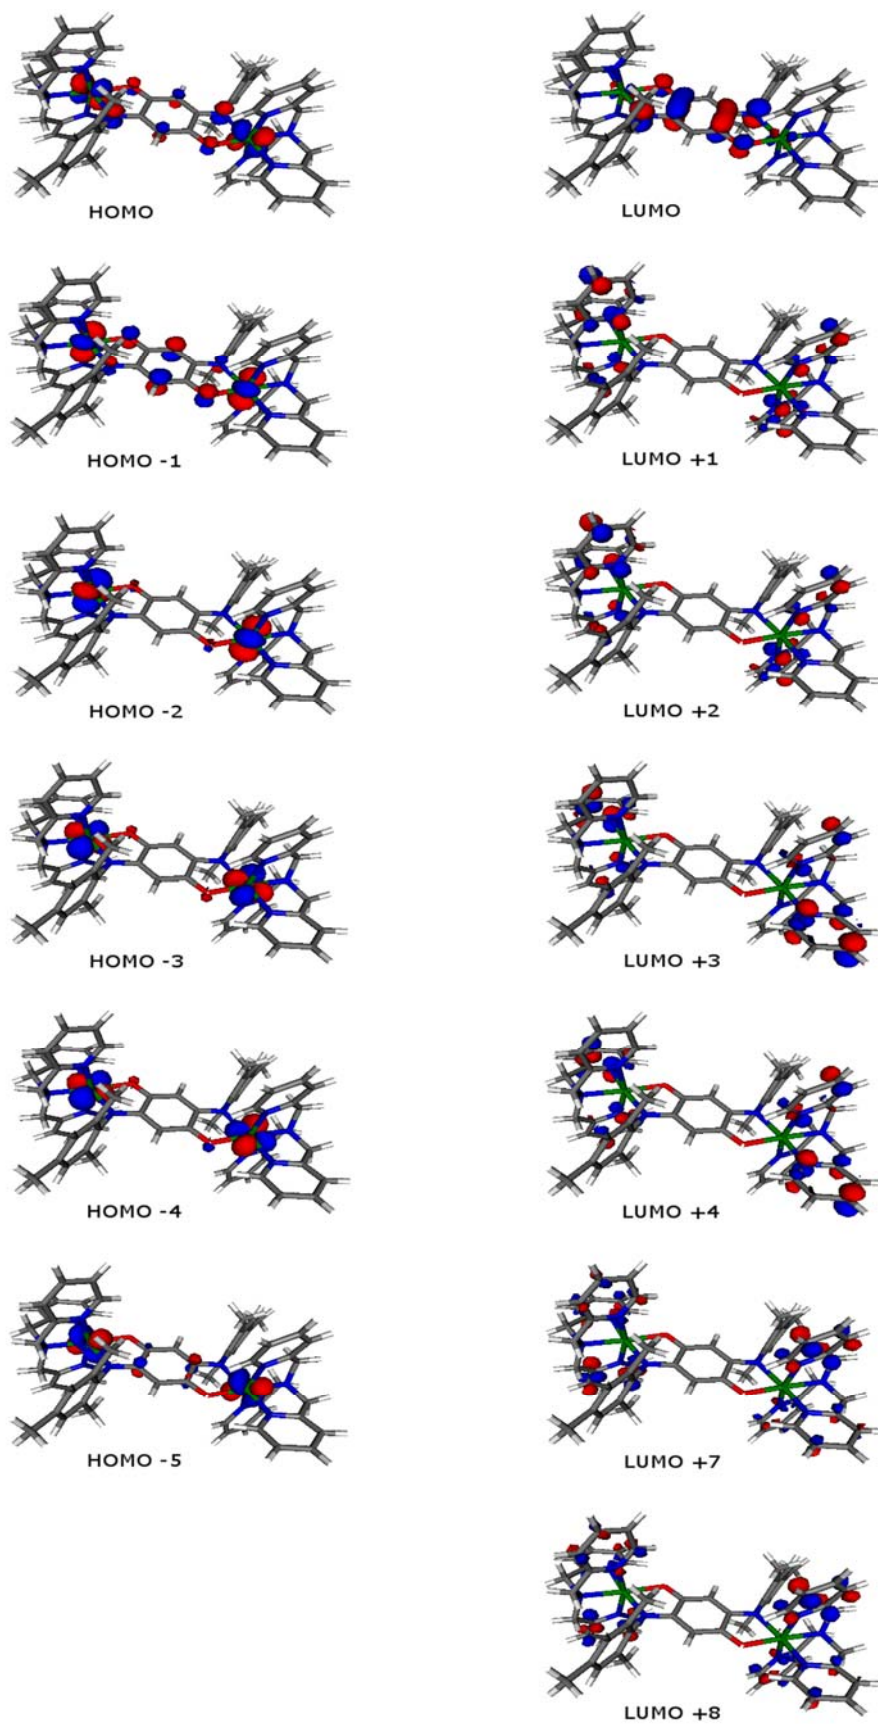

**Figure S27:** Contributing molecular orbitals of  $[3^{\text{N(Mes)}}]^{2+}$  for the main absorption transitions.

**Table S7** Atomic coordinates of the optimised geometry of  $[3^{N(\text{Mes})}]^{3+}$ .

|    |                   |                   |                   |    |                   |                  |                   |
|----|-------------------|-------------------|-------------------|----|-------------------|------------------|-------------------|
| Ru | 2.32504760349012  | 5.42208295314722  | 7.50283247127081  | C  | 4.13548082346873  | 8.82709667057750 | 5.57160213328713  |
| O  | 0.88366227280645  | 6.81826076919952  | 7.82427720574826  | H  | 3.83051437196297  | 9.84736127955211 | 5.34459989695811  |
| N  | 0.80117215880324  | 4.26904516463790  | 8.30292274751513  | C  | 3.30295233551196  | 8.01766357718281 | 6.33364712522364  |
| N  | 3.90095886533174  | 4.09892255671930  | 7.10243046270121  | H  | 2.33904777670804  | 8.35744310579420 | 6.71045029517889  |
| N  | 3.64008113131469  | 6.74646667268654  | 6.64499735893654  | C  | 3.41575018964476  | 3.20392330179860 | 6.00989281278259  |
| N  | 1.81539962062997  | 4.98176843558548  | 5.56351674496270  | H  | 2.79445540126184  | 2.42931477788041 | 6.48376150966092  |
| N  | 3.28849304024217  | 5.45790343266680  | 9.32546865491683  | H  | 4.25127308283498  | 2.70007991347909 | 5.50437580122538  |
| C  | -0.25218280348986 | 6.37614806823862  | 8.29539265103358  | C  | 2.56918933075016  | 3.97513424354360 | 5.03275566555069  |
| C  | -1.34425018432080 | 7.19987464810801  | 8.53995066613582  | C  | 2.48415248591535  | 3.65282598639110 | 3.68392485348878  |
| H  | -1.27784506428711 | 8.26746484354569  | 8.33369992854224  | H  | 3.10519641570220  | 2.85280490823241 | 3.28268960215979  |
| C  | -0.32469795701384 | 4.93440467202768  | 8.57929875171761  | C  | 1.59583704381124  | 4.35575220720511 | 2.86589700827917  |
| C  | 0.88969349992032  | 2.88381895633246  | 8.64036982524071  | H  | 1.51447126684750  | 4.11144744075530 | 1.80724590026042  |
| C  | 0.67159732720206  | 1.90690796624152  | 7.64770109359158  | C  | 0.82423637902321  | 5.37662055209333 | 3.42134011925131  |
| C  | 0.96635329754631  | 0.57151283597583  | 7.95195189400274  | H  | 0.12397734651740  | 5.95248484647283 | 2.81842618928480  |
| H  | 0.81929021718283  | -0.18571680896201 | 7.17767112901799  | C  | 0.96697418954413  | 5.67037642485535 | 4.77320963417662  |
| C  | 1.42840972449921  | 0.18258034145926  | 9.21380438720129  | H  | 0.40672675236417  | 6.46853026477265 | 5.25817234446568  |
| C  | 1.53699208215576  | 1.16539911838995  | 10.20590035045490 | C  | 4.16913436574759  | 3.39031955652279 | 8.38938937825483  |
| H  | 1.85127795348897  | 0.87825555171561  | 11.21260085866825 | H  | 5.12825434672591  | 2.85324512826290 | 8.36325670996961  |
| C  | 1.25405374391831  | 2.51235192352493  | 9.95415699884381  | H  | 3.36680617984213  | 2.65466007144705 | 8.53753336240420  |
| C  | 0.06065892385269  | 2.25023248506197  | 6.31327966277200  | C  | 4.13948874190894  | 4.40487044427999 | 9.50479368818381  |
| H  | 0.64883908302247  | 1.84561675090968  | 5.47767434238687  | C  | 4.90226244399422  | 4.28963100554904 | 10.65957448681596 |
| H  | -0.04868210517706 | 3.32971236907615  | 6.17522671121847  | H  | 5.58074567323183  | 3.44486833824243 | 10.77286594920817 |
| H  | -0.94196326150374 | 1.80278807522874  | 6.24144496717783  | C  | 4.78609576579450  | 5.26046103133356 | 11.65829018165703 |
| C  | 1.74559089400200  | -1.25856255253551 | 9.51640236174948  | H  | 5.37313290797045  | 5.18016174146363 | 12.57260492526492 |
| H  | 2.63975105595210  | -1.34492026618270 | 10.14937594063824 | C  | 3.91866550246658  | 6.33433610036450 | 11.46169822583536 |
| H  | 1.91295266554136  | -1.83169888614402 | 8.59515304475106  | H  | 3.80300292212329  | 7.11629631236170 | 12.21044253800432 |
| H  | 0.91518319915656  | -1.73615950929261 | 10.06027934951295 | C  | 3.18768943954961  | 6.40442750105648 | 10.28021423878608 |
| C  | 1.30394152719301  | 3.50391005576671  | 11.08684686527094 | H  | 2.49435686656171  | 7.21875928905512 | 10.07388334961637 |
| H  | 1.27999427328863  | 4.53963313536936  | 10.73835508683337 | C  | -2.52763808812979 | 6.63933575842258 | 9.06849269128064  |
| H  | 2.20290337831272  | 3.36122670494821  | 11.70104673052298 | C  | -1.50818792652169 | 4.37385945982118 | 9.10763759232100  |
| H  | 0.43418791358532  | 3.36021086545698  | 11.74624738835213 | N  | -3.65323964860851 | 7.30493262307987 | 9.34552923352101  |
| C  | 5.13619350295196  | 4.85852414504193  | 6.68801793777311  | C  | -2.60013626105200 | 5.19762414603591 | 9.35260703552648  |
| H  | 5.77987702225147  | 4.95215456734069  | 7.57439592907133  | H  | -1.57456798244570 | 3.30627680710531 | 9.31392308737425  |
| H  | 5.69968345467822  | 4.28261623004849  | 5.94286626176736  | Ru | -5.17637313727031 | 6.15268529500694 | 10.14758186300738 |
| C  | 4.81625352764413  | 6.23746369616124  | 6.20357633458217  | C  | -3.74124555810659 | 8.69040440568249 | 9.00887360058901  |
| C  | 5.68423899064598  | 6.99079198808859  | 5.41885190371536  | O  | -3.73567419438943 | 4.75579685346871 | 9.82464471308645  |
| H  | 6.61620517083694  | 6.54935140027776  | 5.06734739620935  | N  | -6.75141150924564 | 7.47632677606840 | 10.54950339924007 |
| C  | 5.34204775814732  | 8.30511154173723  | 5.09926646467650  | N  | -6.49038705249353 | 4.82906272253599 | 11.00834384825537 |
| H  | 6.00735525467885  | 8.91194269451969  | 4.48564939418929  | N  | -4.66387614572242 | 6.59362231013322 | 12.08607012755154 |
|    |                   |                   |                   | N  | -6.14215714560496 | 6.11633524901887 | 8.32623856957888  |

|   |                   |                   |                   |   |                   |                   |                   |
|---|-------------------|-------------------|-------------------|---|-------------------|-------------------|-------------------|
| C | -6.26457114842805 | 8.37159674469351  | 11.64111336182037 | C | -4.27779966837028 | 11.39248661291810 | 8.43735859571328  |
| C | -5.41693183034294 | 7.60048959675890  | 12.61742654360571 | H | -3.49497799424901 | 9.72513315930146  | 12.17159823672655 |
| C | -7.02138065729552 | 8.18446472993191  | 9.26265877546081  | H | -2.79670673110287 | 8.24276206973775  | 11.47127018354681 |
| C | -6.99301131714911 | 7.16959720860871  | 8.14747625396400  | H | -1.90518944352064 | 9.77084843182075  | 11.40603082959188 |
| C | -3.52022574682515 | 9.66669314567959  | 10.00147641204101 | H | -4.70512788067818 | 10.69808429476728 | 6.43912450744801  |
| C | -4.10749064809237 | 9.06275433164166  | 7.69585119169726  | H | -4.13792352776200 | 7.03576407485600  | 6.91115733496758  |
| C | -7.98621977602290 | 6.71709155981301  | 10.96593895102985 | H | -5.05987558000977 | 8.21608612662184  | 5.94988263463415  |
| C | -7.66562847388533 | 5.33871724295041  | 11.45153115309417 | H | -3.29116217940311 | 8.21393085850729  | 5.90262017489726  |
| C | -6.15261074616538 | 3.55833728911359  | 11.32085535697217 | C | -5.33044944342788 | 7.92295474358043  | 13.96613310203269 |
| C | -6.04247753941437 | 5.16961710325914  | 7.37158510218952  | H | -8.43493141519639 | 8.1298632397852   | 6.88044189237869  |
| C | -3.81393669764149 | 11.00256378042786 | 9.69820072231959  | C | -7.64149351333804 | 6.31391882513562  | 5.99456621593796  |
| C | -2.90734556769258 | 9.32230096143319  | 11.33473935820072 | H | -9.46318498292281 | 5.02852905473414  | 12.59205066667342 |
| C | -4.38926137139137 | 10.41012104465650 | 7.44509335193823  | C | -8.18892640600543 | 3.27283108750899  | 12.56026506374756 |
| C | -4.16043466712428 | 8.07162800942822  | 6.56296577398325  | H | -6.67791261173730 | 1.73025154957065  | 12.31417584061600 |
| H | -5.64384323146915 | 9.14592373212929  | 11.16604800294937 | H | -6.65941521047683 | 4.45776367117065  | 5.44177405155810  |
| H | -7.09931369956222 | 8.87575814586494  | 12.14760369940776 | C | -4.59412661094054 | 12.83403969137451 | 8.13584175606264  |
| H | -7.98057524512066 | 8.72134110540915  | 9.28996704248422  | H | -8.85272146852003 | 2.66694824118177  | 13.17643612303360 |
| H | -6.21965363741804 | 8.92051762228943  | 9.11324935539532  | H | -8.22919005803974 | 6.39441014646186  | 5.08068542777092  |
| C | -7.75663847434770 | 7.28488803778438  | 6.99327237102238  | C | -3.81471521130399 | 5.90509612381457  | 12.87555937758949 |
| H | -8.63073103004451 | 6.62253756004627  | 10.08025740039667 | H | -5.95099783312687 | 8.72309933630554  | 14.36787257575808 |
| H | -8.54908717646530 | 7.29372977919050  | 11.71100182393092 | C | -4.44142165170083 | 7.21997797230135  | 14.78337272496888 |
| C | -8.53193480602876 | 4.58661340824728  | 12.23924294046116 | C | -3.67053665791249 | 6.19892746287889  | 14.22727835442162 |
| C | -6.98336269089649 | 2.75014923202420  | 12.08616284322888 | H | -3.25505041324826 | 5.10672989629353  | 12.39027984218158 |
| H | -5.18940595828255 | 3.21808221392427  | 10.94272074372150 | H | -4.35904332406269 | 7.46443777500754  | 15.84190257223251 |
| C | -6.77425956626742 | 5.23977680828759  | 6.1906077570309   | H | -2.96966101228407 | 5.62310440064354  | 14.82953129601296 |
| H | -5.34927712653269 | 4.35506669222315  | 7.57748825430259  | H | -5.49091350998683 | 12.92157328958123 | 7.50674190044486  |
| H | -3.66455928983761 | 11.75937928369976 | 10.47244113766945 | H | -4.75673480546900 | 13.40756690577816 | 9.05769385336132  |
|   |                   |                   |                   | H | -3.76539719213644 | 13.31029848562764 | 7.58824722646197  |

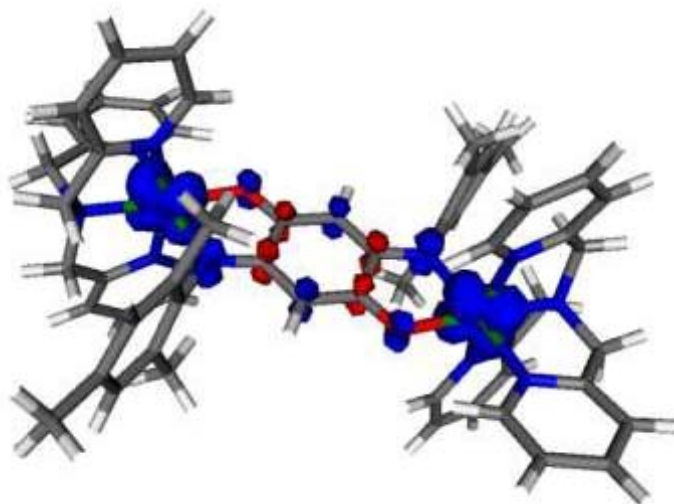

**Figure S28:** Spin-density distribution of  $[3^{N(\text{Mes})}]^{3+}$ .

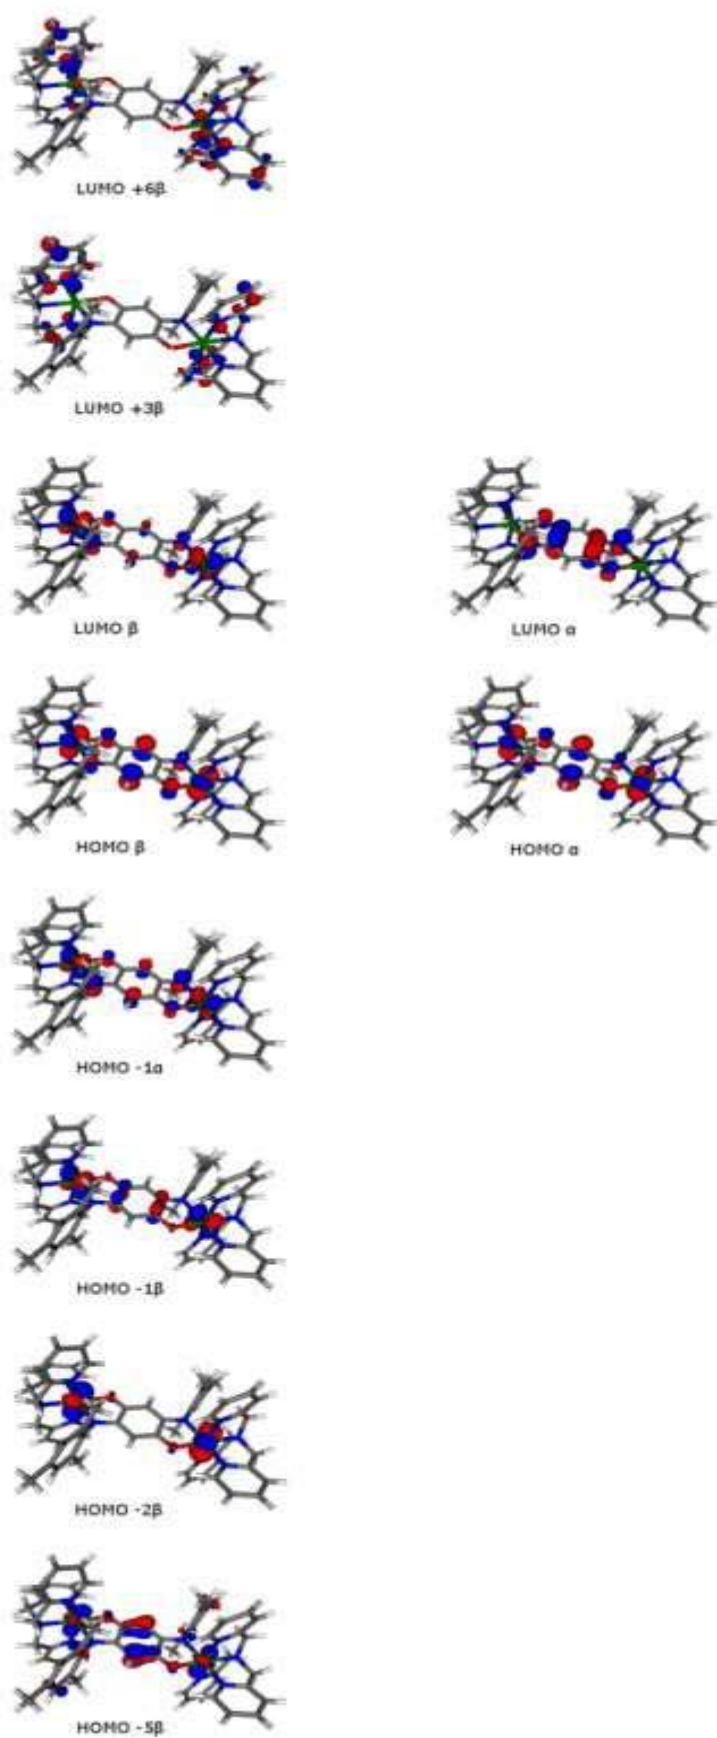

**Figure S29:** Contributing molecular orbitals of  $[3^{\text{N(Mes)}}]^{3+}$  for the main absorption transitions.

**Table S8** Atomic coordinates of the optimised geometry of  $[3^{N(\text{Mes})}]^{4+}$ 

|    |                   |                   |                   |    |                   |                  |                   |   |                   |                  |                   |
|----|-------------------|-------------------|-------------------|----|-------------------|------------------|-------------------|---|-------------------|------------------|-------------------|
| Ru | 2.27952361372964  | 5.39815359905460  | 7.47118365257209  | H  | 3.87579599399773  | 9.89560365523061 | 5.51523774959338  | C | 3.30270311484745  | 8.03109725715474 | 6.40623760573815  |
| O  | 0.87781881313715  | 6.79029100585174  | 7.80216378187183  | H  | 2.33894461749222  | 8.37075419690829 | 6.78248239221102  | C | 3.37184628678455  | 3.18402121900584 | 5.93466975976065  |
| N  | 0.78535578609927  | 4.25978094454150  | 8.28060721837747  | H  | 2.74802665736981  | 2.40123670753943 | 6.39097207029570  | H | 4.21148375557430  | 2.68730588961752 | 5.43093290432954  |
| N  | 3.85322793755547  | 4.06372178244457  | 7.04082678714951  | C  | 2.53809314683934  | 3.97557946593759 | 4.96740380879907  | C | 2.43758163566387  | 3.66654025748628 | 3.61686071138056  |
| N  | 3.61844775260288  | 6.74198887179881  | 6.65993815360987  | H  | 3.03762423671525  | 2.85613337540169 | 3.20548491816541  | H | 3.03762423671525  | 2.85613337540169 | 3.20548491816541  |
| N  | 1.80968085711287  | 4.99458202440437  | 5.50588169011821  | C  | 1.56151711708993  | 4.39745027419626 | 2.81180208763060  | H | 1.46844330139312  | 4.16366694861444 | 1.75188276932313  |
| N  | 3.30595143034529  | 5.39828537983921  | 9.26780864816591  | C  | 0.81737627503332  | 5.43315802776583 | 3.37775473263840  | H | 0.12829061818690  | 6.03034417009543 | 2.78333088714812  |
| C  | -0.26094363733300 | 6.36507231350337  | 8.28575092625581  | C  | 0.97490299989461  | 5.71542230762595 | 4.72901836374662  | H | 0.43924057217559  | 6.52641912630064 | 5.21939376173743  |
| C  | -1.33760666611496 | 7.20615511814452  | 8.53539693897573  | H  | 4.13176273065134  | 3.32469543286770 | 8.30908672786397  | C | 4.13176273065134  | 3.32469543286770 | 8.30908672786397  |
| H  | -1.26435702255446 | 8.27271993938778  | 8.32823913499728  | H  | 5.08695614237677  | 2.78484459813987 | 8.25268103512576  | H | 5.08695614237677  | 2.78484459813987 | 8.25268103512576  |
| C  | -0.33664631912686 | 4.92909039503871  | 8.57853038890010  | H  | 3.33035197117293  | 2.58796732258264 | 8.45459251183933  | H | 3.33035197117293  | 2.58796732258264 | 8.45459251183933  |
| C  | 0.89402275844580  | 2.88259882174652  | 8.65096587517693  | C  | 4.12735384493544  | 4.32270143016474 | 9.43609099597480  | C | 4.12735384493544  | 4.32270143016474 | 9.43609099597480  |
| C  | 0.71889393225492  | 1.88750160182339  | 7.66787678654572  | C  | 4.88971397072131  | 4.18429741473911 | 10.58827895126897 | C | 4.88971397072131  | 4.18429741473911 | 10.58827895126897 |
| C  | 1.04442440968636  | 0.56788284417049  | 8.00118263292801  | H  | 5.54719524967335  | 3.32297771539472 | 10.69682631515995 | H | 5.54719524967335  | 3.32297771539472 | 10.69682631515995 |
| H  | 0.92754816995216  | -0.20722679500847 | 7.24023969088709  | C  | 4.80183788153420  | 5.15677186566039 | 11.58713722104312 | C | 4.80183788153420  | 5.15677186566039 | 11.58713722104312 |
| C  | 1.49987256116718  | 0.21622746459178  | 9.27730226716096  | H  | 5.38934561049409  | 5.05878648964273 | 12.49929587798161 | C | 3.96664583771304  | 6.25711782768646 | 11.39611162294826 |
| C  | 1.56494034070618  | 1.21791294409586  | 10.25421205957453 | C  | 3.96664583771304  | 6.25711782768646 | 11.39611162294826 | H | 3.87738375506315  | 7.04163081808716 | 12.14531248167310 |
| H  | 1.87688320312673  | 0.95837102148688  | 11.26860411681708 | H  | 3.87738375506315  | 7.04163081808716 | 12.14531248167310 | C | 3.23482697314455  | 6.35180115381762 | 10.21827082345576 |
| C  | 1.24618006174920  | 2.55178110502364  | 9.97827788337044  | C  | 3.23482697314455  | 6.35180115381762 | 10.21827082345576 | H | 2.56778744670460  | 7.18826419099365 | 10.01540576177142 |
| C  | 0.10130709272455  | 2.19511607642386  | 6.32870596429602  | H  | 2.56778744670460  | 7.18826419099365 | 10.01540576177142 | C | -2.51039631339812 | 6.64602162138138 | 9.08315377894165  |
| H  | 0.61958008756269  | 1.67477940859918  | 5.51213694038273  | C  | -1.50855250224548 | 4.36933904257703 | 9.12852132928706  | C | -1.50855250224548 | 4.36933904257703 | 9.12852132928706  |
| H  | 0.08098554701053  | 3.26743741068272  | 6.11283865784373  | N  | -3.63353234090536 | 7.31473950791974 | 9.37821527603549  | N | -3.63353234090536 | 7.31473950791974 | 9.37821527603549  |
| H  | -0.94219962401965 | 1.84506810789330  | 6.31818438896410  | C  | -2.58521351282601 | 5.21045515673973 | 9.37819090309673  | C | -2.58521351282601 | 5.21045515673973 | 9.37819090309673  |
| C  | 1.85684706094549  | -1.20767435281947 | 9.60886799074986  | H  | -1.58154375935831 | 3.30297697681830 | 9.33674153941716  | H | -1.58154375935831 | 3.30297697681830 | 9.33674153941716  |
| H  | 2.74693541091002  | -1.25479078132549 | 10.25125340777285 | Ru | -5.12986224176325 | 6.17537953918973 | 10.18240765580288 | C | -3.74175901120282 | 8.69192272476189 | 9.00728278765089  |
| H  | 2.04755750689290  | -1.7928000280353  | 8.70016289360609  | C  | -3.74175901120282 | 8.69192272476189 | 9.00728278765089  | O | -3.72322610309019 | 4.78557737848819 | 9.86381353418604  |
| H  | 1.03498560256346  | -1.69640663586625 | 10.15560170957875 | O  | -3.72322610309019 | 4.78557737848819 | 9.86381353418604  | N | -6.71249807528901 | 7.50554622844416 | 10.59271609154869 |
| C  | 1.26061673027072  | 3.56291503178439  | 11.09381359779079 | N  | -6.71249807528901 | 7.50554622844416 | 10.59271609154869 | N | -6.46950351055158 | 4.83071261538035 | 10.99158490507757 |
| H  | 1.25237970278686  | 4.59564090419976  | 10.73491898272567 | N  | -6.46950351055158 | 4.83071261538035 | 10.99158490507757 | N | -4.67765684698672 | 6.58905040450768 | 12.14911555403930 |
| H  | 2.13709718392185  | 3.42450324267461  | 11.73983379665152 | N  | -4.67765684698672 | 6.58905040450768 | 12.14911555403930 | N | -6.14132579068338 | 6.16386483003836 | 8.37700036471633  |
| H  | 0.36930144368896  | 3.43201483079521  | 11.72646845035124 | N  | -6.14132579068338 | 6.16386483003836 | 8.37700036471633  | C | -6.24572640408300 | 8.39012788679342 | 11.70121590437262 |
| C  | 5.09191338060839  | 4.82839486837541  | 6.63473547850406  | C  | -6.24572640408300 | 8.39012788679342 | 11.70121590437262 | C | -5.41668947373654 | 7.60533707832044 | 12.67809882703112 |
| H  | 5.75832125094659  | 4.86934985498000  | 7.50786016154988  | C  | -5.41668947373654 | 7.60533707832044 | 12.67809882703112 |   |                   |                  |                   |
| H  | 5.62687337947344  | 4.27562165608882  | 5.85263234652787  |    |                   |                  |                   |   |                   |                  |                   |
| C  | 4.79145117259161  | 6.23251655244186  | 6.21609231816853  |    |                   |                  |                   |   |                   |                  |                   |
| C  | 5.68430041255830  | 7.00858167861236  | 5.48253223985677  |    |                   |                  |                   |   |                   |                  |                   |
| H  | 6.61553256250853  | 6.57002825727807  | 5.12626502332895  |    |                   |                  |                   |   |                   |                  |                   |
| C  | 5.36631861568504  | 8.34067744721754  | 5.22163881998495  |    |                   |                  |                   |   |                   |                  |                   |
| H  | 6.05117240215630  | 8.96523349265386  | 4.64882733751574  |    |                   |                  |                   |   |                   |                  |                   |
| C  | 4.16033016336721  | 8.86099549290766  | 5.69819882338025  |    |                   |                  |                   |   |                   |                  |                   |

|   |                   |                   |                   |   |                   |                   |                   |
|---|-------------------|-------------------|-------------------|---|-------------------|-------------------|-------------------|
| C | -6.98142569837361 | 8.23929512863740  | 9.31952851947526  | H | -1.93733305498062 | 9.75901585721731  | 11.36483576846326 |
| C | -6.96201442482195 | 7.23776386885193  | 8.19569797120668  | H | -4.70685247043372 | 10.61417078531101 | 6.38133378404610  |
| C | -3.57763598578614 | 9.68719813492778  | 9.99175681374077  | H | -4.10573244232318 | 6.97846428737000  | 6.91862747378433  |
| C | -4.08303819702725 | 9.02207064619627  | 7.67667967556779  | H | -4.93446874018318 | 8.16769108783048  | 5.88752191307662  |
| C | -7.95199771160670 | 6.73699941216241  | 10.98890370486497 | H | -3.16823967792327 | 8.12371152836504  | 5.95725523274782  |
| C | -7.64801825914825 | 5.33833653626250  | 11.42301993391320 | C | -5.33018237786515 | 7.91858044974084  | 14.02867909714923 |
| C | -6.14900579569657 | 3.54569928354990  | 11.25916162716612 | H | -8.36716827219486 | 8.23217271034058  | 6.91439676603339  |
| C | -6.05811942776141 | 5.20701615522242  | 7.43086775269532  | C | -7.60899359638809 | 6.39646202309373  | 6.03903193845217  |
| C | -3.90311224837833 | 11.00637688859325 | 9.65543598075926  | H | -9.47718950294877 | 5.00193331097503  | 12.50452752767779 |
| C | -2.97102728803341 | 9.38223594354884  | 11.33666108526642 | C | -8.21843471960199 | 3.23677679190080  | 12.43378354507220 |
| C | -4.40302697668976 | 10.35482641972372 | 7.39822550063826  | H | -6.71833344864716 | 1.68675108673301  | 12.16423581448996 |
| C | -4.08208129242124 | 8.01138940771632  | 6.56088625028217  | H | -6.67658646531266 | 4.51045996285883  | 5.49825438002928  |
| H | -5.62197841063188 | 9.17526500408933  | 11.24890639434301 | C | -4.70872976864591 | 12.77920030072510 | 8.04085146966231  |
| H | -7.09260117050823 | 8.88347244527661  | 12.19605860579076 | H | -8.90354433574511 | 2.61419451490332  | 13.00842377383334 |
| H | -7.93937838091221 | 8.77525717264621  | 9.36453732822640  | H | -8.18508836123691 | 6.49137876115503  | 5.11929324949949  |
| H | -6.18174313537334 | 8.97891085463367  | 9.17930811635423  | C | -3.84522873605287 | 5.87570452221726  | 12.93534326085204 |
| C | -7.71022871604990 | 7.37186833267838  | 7.03374615570386  | H | -5.93871324911352 | 8.72653095011432  | 14.43234868714564 |
| H | -8.60613279808268 | 6.68444701324962  | 10.10715080276174 | C | -4.45708449988853 | 7.19509439997722  | 14.84362695968372 |
| H | -8.50029315362249 | 7.29250778358146  | 11.75951805574704 | C | -3.70144564545621 | 6.16258614444352  | 14.28713947348951 |
| C | -8.54159696962458 | 4.56474150567406  | 12.15817898978329 | H | -3.29968774597744 | 5.06716819082977  | 12.45188703811240 |
| C | -7.00691081575813 | 2.71813577347164  | 11.96973124544787 | H | -4.37491714217914 | 7.43226408736098  | 15.90368665409573 |
| H | -5.18106315966524 | 3.20745722912318  | 10.89252187758683 | H | -3.01359004705328 | 5.57155258739009  | 14.88907400212796 |
| C | -6.77555245460118 | 5.29725813281019  | 6.24384901617261  | H | -5.61478444134420 | 12.82357880204867 | 7.42071411210564  |
| H | -5.39311428847806 | 4.37162173306091  | 7.64447642042443  | H | -4.87518440058896 | 13.37284460655818 | 8.94871789904414  |
| H | -3.79385501632546 | 11.78167633997905 | 10.41733046716990 | H | -3.89980438926722 | 13.25997837367716 | 7.46853787647669  |
| C | -4.34890468871050 | 11.35686419477620 | 8.37594196170136  |   |                   |                   |                   |
| H | -3.51296839401126 | 9.88141116908603  | 12.15118754772443 |   |                   |                   |                   |
| H | -2.92733780736686 | 8.30870655758252  | 11.54283817954291 |   |                   |                   |                   |

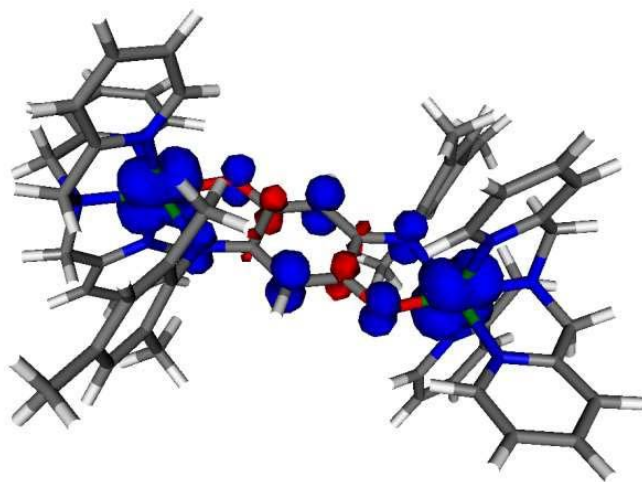

Figure S30: Spin-density distribution of  $[3^{N(\text{Mes})}]^{4+}$ .

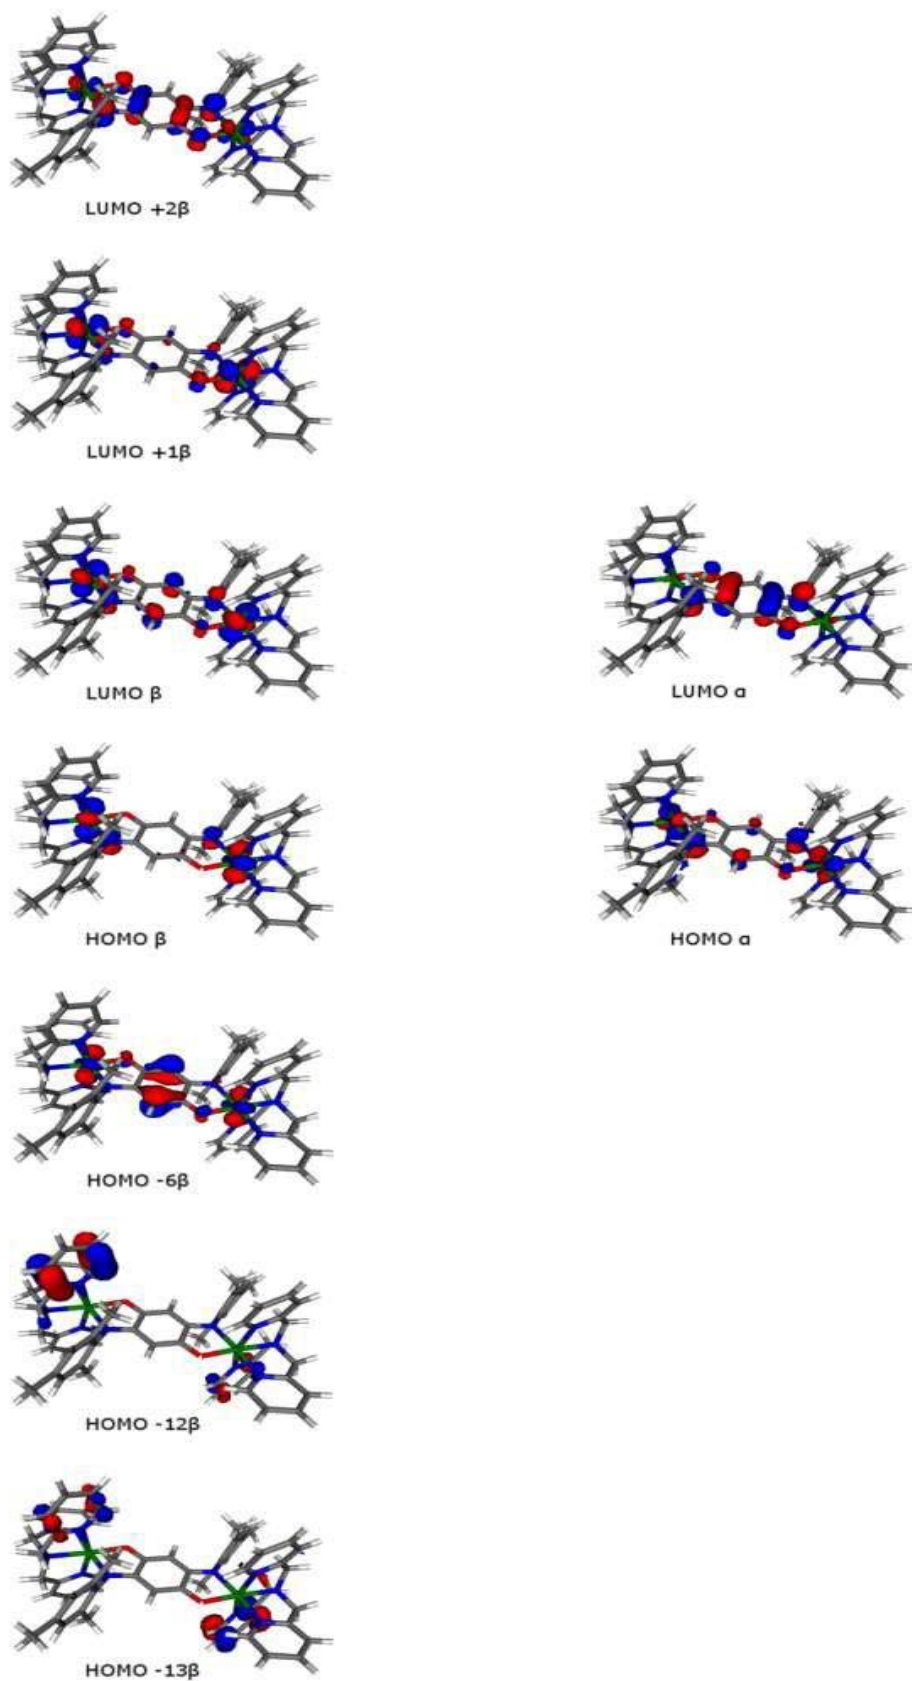

**Figure S31:** Contributing molecular orbitals of  $[3^{N(\text{Mes})}]^{4+}$  for the main absorption transitions.



**Table S9** Atomic coordinates of the optimised geometry of  $[3^{\text{N(Mes)}}]^+$ .

|    |                   |                   |                   |    |                   |                  |                   |   |                  |                  |                  |
|----|-------------------|-------------------|-------------------|----|-------------------|------------------|-------------------|---|------------------|------------------|------------------|
| Ru | 2.37086702164298  | 5.41094031803325  | 7.52043660256048  | H  | 3.77586803032406  | 9.74355409434714 | 5.15190339947385  | C | 3.30560048367552 | 7.96994681283444 | 6.26169862020016 |
| O  | 0.90778748051922  | 6.85482056990603  | 7.84606908938810  | H  | 2.34722544488984  | 8.31397067377454 | 6.65060295925807  |   |                  |                  |                  |
| N  | 0.83445269715361  | 4.25874134236627  | 8.31799696903099  | C  | 3.45757456224677  | 3.22358905160744 | 6.00865676374386  |   |                  |                  |                  |
| N  | 3.94269400556012  | 4.08469953186857  | 7.12429275940012  | H  | 2.81229024804138  | 2.45818417559208 | 6.46420031609149  |   |                  |                  |                  |
| N  | 3.66116225959979  | 6.71725223986245  | 6.64246425945739  | H  | 4.28712051760914  | 2.71077782318642 | 5.49742949635250  |   |                  |                  |                  |
| N  | 1.86774343353039  | 5.02070877850108  | 5.59323027411253  | C  | 2.63933986418689  | 4.03496425548029 | 5.03557645789117  |   |                  |                  |                  |
| N  | 3.30489070411954  | 5.44435608350516  | 9.34415085190151  | C  | 2.60277728057751  | 3.77632017881728 | 3.67143953810875  |   |                  |                  |                  |
| C  | -0.24053215508339 | 6.37183246463649  | 8.30130515574227  | H  | 3.24019676164926  | 2.99533182411200 | 3.25664390996994  |   |                  |                  |                  |
| C  | -1.36043672311686 | 7.17623305318884  | 8.53595814570134  | C  | 1.74217344234971  | 4.51480753000236 | 2.85092706946474  |   |                  |                  |                  |
| H  | -1.30314222731454 | 8.24605210653191  | 8.32757964157275  | H  | 1.69812407955880  | 4.31893687919951 | 1.77984907312937  |   |                  |                  |                  |
| C  | -0.31067789049630 | 4.94986947647064  | 8.57602150140546  | C  | 0.95143260837716  | 5.51077931565300 | 3.42979370399193  |   |                  |                  |                  |
| C  | 0.90989772698578  | 2.88892823531971  | 8.65957240321022  | H  | 0.26985332013680  | 6.11259778452053 | 2.82922035371054  |   |                  |                  |                  |
| C  | 0.70830309515402  | 1.89826573042622  | 7.67172701309962  | C  | 1.04690564342246  | 5.74250495794846 | 4.79805701496058  |   |                  |                  |                  |
| C  | 1.00500897384909  | 0.56172297941466  | 7.97449522152635  | H  | 0.46920116656301  | 6.51253046118265 | 5.30912325232021  |   |                  |                  |                  |
| H  | 0.87857075043962  | -0.19549520520825 | 7.19510412387265  | C  | 4.18400768839979  | 3.36980974400345 | 8.40785710351053  |   |                  |                  |                  |
| C  | 1.44642793511711  | 0.17008846094920  | 9.24297198675911  | H  | 5.14202257639274  | 2.82520662539766 | 8.40564367596076  |   |                  |                  |                  |
| C  | 1.53266923499927  | 1.15388281145604  | 10.23762088279816 | H  | 3.37092821811902  | 2.64224045298512 | 8.53818662333064  |   |                  |                  |                  |
| H  | 1.83457953588038  | 0.86620036523466  | 11.24908753092050 | C  | 4.13930228654835  | 4.37660385408437 | 9.53508437261322  |   |                  |                  |                  |
| C  | 1.24851567283901  | 2.49946141078643  | 9.97924674321806  | C  | 4.87504706431262  | 4.23654737569449 | 10.70419053398814 |   |                  |                  |                  |
| C  | 0.12717766737809  | 2.25052131918188  | 6.32586484407039  | H  | 5.53767354817981  | 3.37920875450014 | 10.82210928869909 |   |                  |                  |                  |
| H  | 0.73463832242071  | 1.85944357898382  | 5.49645248940041  | C  | 4.75165873666552  | 5.19560122878834 | 11.71645358555776 |   |                  |                  |                  |
| H  | 0.03266018005738  | 3.33433401467691  | 6.21036782963164  | H  | 5.31591026080287  | 5.09412706734740 | 12.64322885087348 |   |                  |                  |                  |
| H  | -0.87504086804918 | 1.80632570259876  | 6.22358963692798  | C  | 3.90228390585523  | 6.28303728334142 | 11.51236815996928 |   |                  |                  |                  |
| C  | 1.77148207394366  | -1.27065976959146 | 9.54787046516186  | H  | 3.77744420220476  | 7.05505354124301 | 12.27092436090550 |   |                  |                  |                  |
| H  | 2.70923513413825  | -1.35785004371287 | 10.11592598226525 | C  | 3.19950737086027  | 6.37661343460108 | 10.31416770568293 |   |                  |                  |                  |
| H  | 1.87103542967599  | -1.85980631044771 | 8.62635784017615  | H  | 2.51390231825402  | 7.19591497985802 | 10.09903435911421 |   |                  |                  |                  |
| H  | 0.98105067704029  | -1.73654436180429 | 10.15794201927414 | C  | -2.55501114298515 | 6.62018326943055 | 9.04525417427057  |   |                  |                  |                  |
| C  | 1.28093079752541  | 3.49789433970123  | 11.10586820295809 | C  | -1.50609721529196 | 4.39347643664874 | 9.08296965781760  |   |                  |                  |                  |
| H  | 1.25582972861013  | 4.52397372726494  | 10.72909602373135 | N  | -3.69978993625437 | 7.31124637704737 | 9.30522000340764  |   |                  |                  |                  |
| H  | 2.17513014194368  | 3.36995556796138  | 11.73148083605775 | C  | -2.62542843171981 | 5.19804739170595 | 9.31907021752260  |   |                  |                  |                  |
| H  | 0.40186345873049  | 3.36180812063212  | 11.75502245465174 | H  | -1.56312395374691 | 3.32369886122866 | 9.29167645032079  |   |                  |                  |                  |
| C  | 5.17741763057949  | 4.85419614898192  | 6.73767984938807  | Ru | -5.22654997958815 | 6.16366034246459 | 10.12530036141888 |   |                  |                  |                  |
| H  | 5.76535461069913  | 5.00100542160965  | 7.65561867694364  | C  | -3.77450896555382 | 8.68167337478833 | 8.96582669486727  |   |                  |                  |                  |
| H  | 5.79667814351307  | 4.26591202716788  | 6.04633320708449  | O  | -3.77376443389416 | 4.71541305685645 | 9.77461918400646  |   |                  |                  |                  |
| C  | 4.83643665869646  | 6.20120140538295  | 6.18133424251196  | N  | -6.78580340042266 | 7.49501026861741 | 10.55406115413635 |   |                  |                  |                  |
| C  | 5.66493146177629  | 6.91529295450047  | 5.32321220136292  | N  | -6.50528540800415 | 4.86027893964443 | 11.02452338683151 |   |                  |                  |                  |
| H  | 6.58729212281574  | 6.45873404301898  | 4.96324404497430  | N  | -4.68593619992582 | 6.54841169481776 | 12.04322664921320 |   |                  |                  |                  |
| C  | 5.30254113970742  | 8.20969503892463  | 4.93826819625759  | N  | -6.19442150777035 | 6.13752111442829 | 8.31877597719763  |   |                  |                  |                  |
| H  | 5.93848851027168  | 8.78678397990491  | 4.26752831055096  | C  | -6.27402254296880 | 8.35378218296752 | 11.65960146638256 |   |                  |                  |                  |
| C  | 4.10276955064365  | 8.74087819673195  | 5.42624393724474  | C  | -5.44123541696300 | 7.53791328930444 | 12.61636617839631 |   |                  |                  |                  |

|   |                   |                   |                   |   |                   |                   |                   |
|---|-------------------|-------------------|-------------------|---|-------------------|-------------------|-------------------|
| C | -7.05088724319950 | 8.21144714947164  | 9.27617159461056  | H | -1.93831216340520 | 9.75627343235133  | 11.37078798318501 |
| C | -7.03370184420980 | 7.20489703614328  | 8.14812703635140  | H | -4.73496435877156 | 10.71061294622400 | 6.39432224486401  |
| C | -3.54628403126443 | 9.67126443627469  | 9.94943777120371  | H | -4.09728615189782 | 7.05025656049253  | 6.89950562404976  |
| C | -4.13738736630112 | 9.07263142151576  | 7.65363171129670  | H | -5.15381645417559 | 8.15066430968761  | 5.97784569697455  |
| C | -8.01536427978458 | 6.73020697195138  | 10.96563617183603 | H | -3.39321202779884 | 8.25837277922893  | 5.80946492582155  |
| C | -7.66910428661009 | 5.37971578127172  | 11.51018907693611 | C | -5.37658718569869 | 7.79543950070803  | 13.97967775945032 |
| C | -6.14749522926992 | 3.60499960055267  | 11.39478209713634 | H | -8.46475490644746 | 8.20121658876871  | 6.89666534683889  |
| C | -6.10970894983665 | 5.20747973311683  | 7.34471410629078  | C | -7.69757779862166 | 6.38699312127731  | 5.98149542436226  |
| C | -3.83905159862654 | 11.00952099680786 | 9.65192345040870  | H | -9.39705236213690 | 5.12551183147219  | 12.76125779890103 |
| C | -2.94329868030235 | 9.31506086478915  | 11.28462933073700 | C | -8.11943184538948 | 3.36921252246697  | 12.75588344309099 |
| C | -4.41551172293159 | 10.42077179428433 | 7.39978562012923  | H | -6.60339327183710 | 1.82991331247729  | 12.50815100446866 |
| C | -4.20588408615516 | 8.07323022709933  | 6.52884948027008  | H | -6.73219295633601 | 4.53094945800656  | 5.40092869354955  |
| H | -5.63351223393614 | 9.11518629597655  | 11.19071008968816 | C | -4.61531296872301 | 12.84839970763302 | 8.09142468154408  |
| H | -7.09035479744401 | 8.87144303015735  | 12.18699138594500 | H | -8.74461685006781 | 2.79255940774333  | 13.43703546268767 |
| H | -8.00625467156337 | 8.76017087818533  | 9.29859272750185  | H | -8.28452602806780 | 6.48819665118419  | 5.06889331118270  |
| H | -6.23756136651549 | 8.93560542890120  | 9.12919941466905  | C | -3.85367971975580 | 5.82155961432756  | 12.82177985209025 |
| C | -7.79818960826962 | 7.34476417091340  | 6.99754665271493  | H | -6.00150487257586 | 8.57959423845025  | 14.40731725239541 |
| H | -8.62457766386772 | 6.58943516098402  | 10.06071935286342 | C | -4.50410682037837 | 7.05177046253543  | 14.78277895616301 |
| H | -8.61597080922599 | 7.31928625295773  | 11.67257338415533 | C | -3.73029743691321 | 6.05178276966713  | 14.18802509703792 |
| C | -8.48376733087227 | 4.66629426990648  | 12.38202919369638 | H | -3.29032518107631 | 5.04892557761742  | 12.29874024485838 |
| C | -6.93142290050593 | 2.83475857213723  | 12.24325418756478 | H | -4.43803130802256 | 7.24674460528241  | 15.85288010098672 |
| H | -5.19802223225168 | 3.25855705751546  | 10.98663630331454 | H | -3.04054278867568 | 5.44594866246034  | 14.77508085911846 |
| C | -6.84061206725592 | 5.30154344670614  | 6.16346152748873  | H | -5.52274024781047 | 12.94164083111511 | 7.47751177415576  |
| H | -5.41864291331063 | 4.38846954724937  | 7.54273571272258  | H | -4.76236998825463 | 13.42441431672891 | 9.01500592079448  |
| H | -3.69226138220226 | 11.76602518312341 | 10.42845551442330 | H | -3.79534056474770 | 13.32494436757215 | 7.53021777328228  |
| C | -4.30144779414766 | 11.40414532437207 | 8.39152260117190  |   |                   |                   |                   |
| H | -3.53578895275274 | 9.70652923493273  | 12.12465459083526 |   |                   |                   |                   |
| H | -2.85005052741223 | 8.23083185025362  | 11.39719709921927 |   |                   |                   |                   |

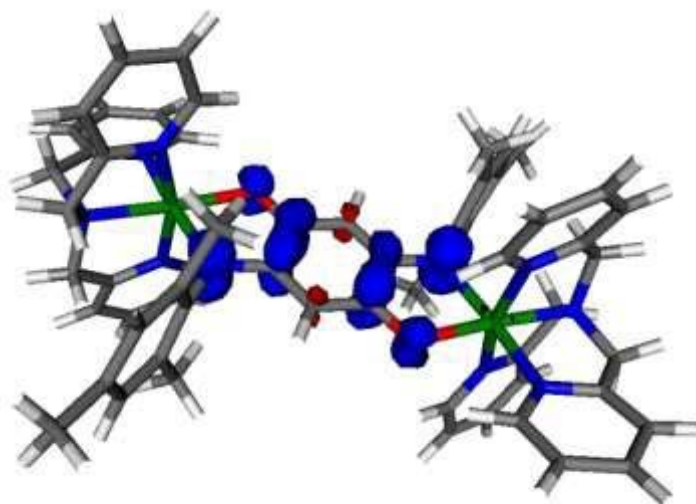

Figure S32: Spin-density distribution of  $[3^{N(\text{Mes})}]^+$ .

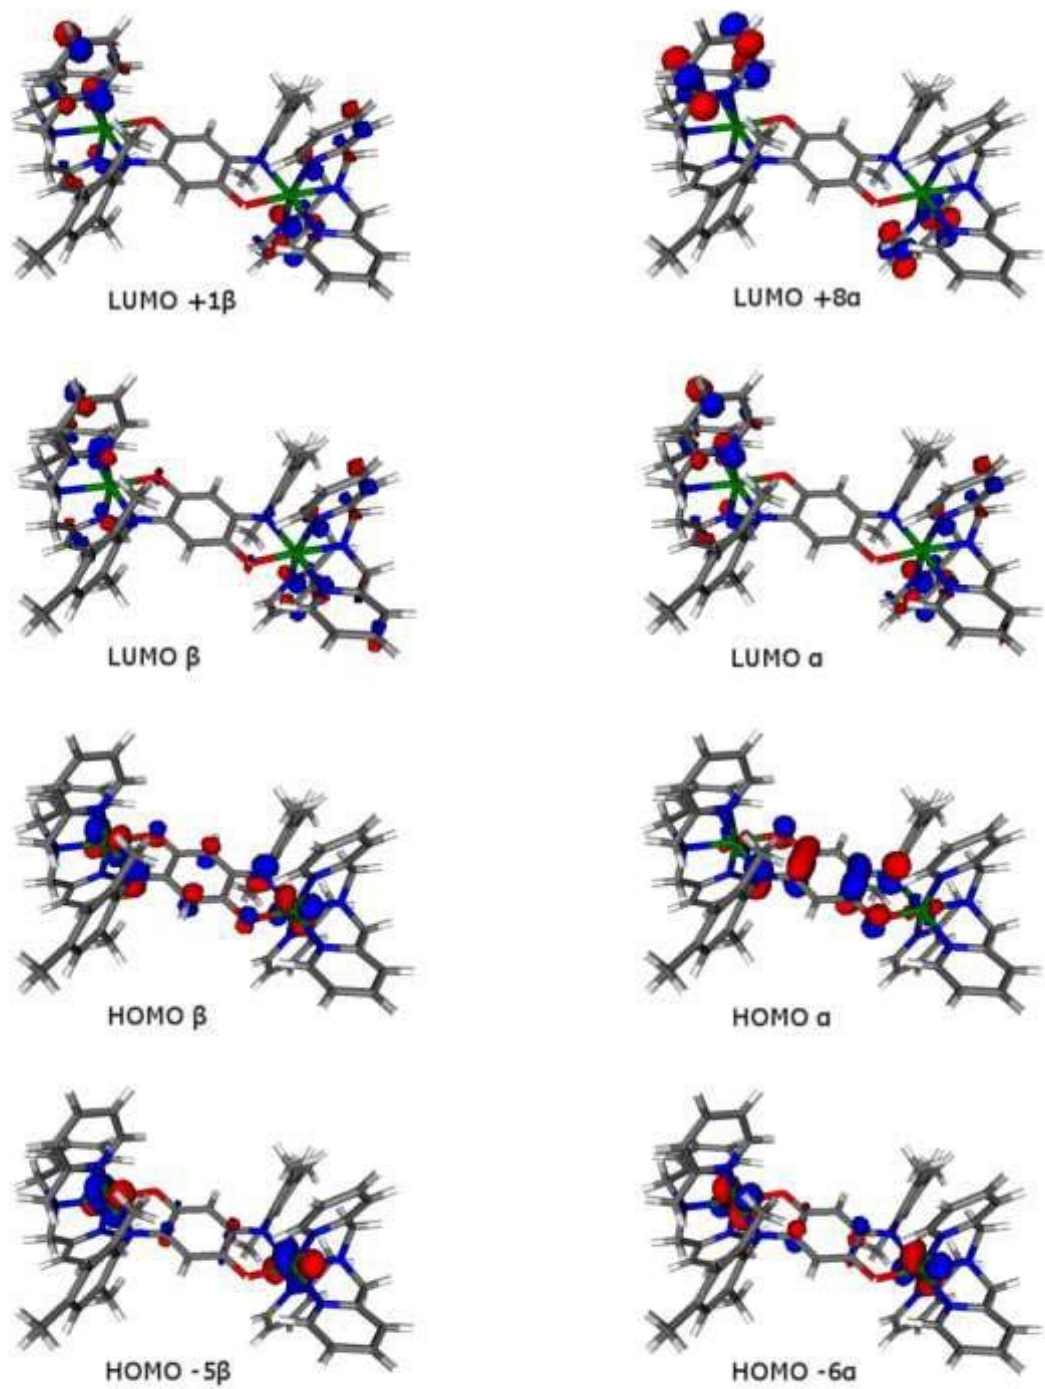

**Figure S33:** Contributing molecular orbitals of  $[3^{N(\text{Mes})}]^+$  for the main absorption transitions.

**Table S10** Atomic coordinates of the optimised geometry of  $[2^{\text{NH,N(Mes)}}]^{2+}$ .

|          |                |                |                |    |          |         |          |   |          |          |          |
|----------|----------------|----------------|----------------|----|----------|---------|----------|---|----------|----------|----------|
| Ru       | 2.43446        | 5.53513        | 7.49051        | C  | 1.13318  | 5.72811 | 4.73202  | C | -7.57420 | 5.23813  | 11.47516 |
| O        | 0.93138        | 6.94272        | 7.78036        | H  | 0.58705  | 6.55973 | 5.17605  | C | -6.00416 | 3.50901  | 11.34760 |
| N        | 0.92963        | 4.39602        | 8.27620        | C  | 4.17074  | 3.52053 | 8.51750  | C | -5.99309 | 5.10193  | 7.38131  |
| N        | 3.96593        | 4.16346        | 7.18481        | H  | 5.10454  | 2.93856 | 8.55445  | C | -3.89189 | 10.98223 | 9.68666  |
| N        | 3.77339        | 6.79430        | 6.60878        | H  | 3.33340  | 2.82723 | 8.67876  | C | -2.92931 | 9.32569  | 11.31733 |
| N        | 1.93773        | 5.04541        | 5.57362        | C  | 4.15035  | 4.58963 | 9.58408  | C | -4.46055 | 10.37444 | 7.43703  |
| N        | 3.32695        | 5.65111        | 9.33164        | C  | 4.88824  | 4.51051 | 10.75773 | C | -4.16051 | 8.04221  | 6.55549  |
| C        | -0.18163       | 6.47140        | 8.27235        | H  | 5.54886  | 3.65954 | 10.92214 | H | -5.65604 | 9.07488  | 11.18977 |
| C        | -1.30580       | 7.25291        | 8.52104        | C  | 4.76987  | 5.52666 | 11.71273 | H | -7.10365 | 8.77101  | 12.17771 |
| H        | -1.28367       | 8.32042        | 8.30194        | H  | 5.33831  | 5.47786 | 12.64116 | H | -7.98814 | 8.61814  | 9.29938  |
| C        | -0.21139       | 5.01935        | 8.56630        | C  | 3.92023  | 6.60140 | 11.45208 | H | -6.22775 | 8.84705  | 9.12867  |
| C        | 5.22619        | 4.86971        | 6.75547        | H  | 3.79862  | 7.41467 | 12.16644 | C | -7.73669 | 7.19033  | 7.00667  |
| H        | 5.85581        | 4.98846        | 7.64914        | C  | 3.21853  | 6.63333 | 10.24962 | H | -8.57436 | 6.47438  | 10.08197 |
| H        | 5.78999        | 4.24859        | 6.04668        | H  | 2.54441  | 7.44863 | 9.98931  | H | -8.53668 | 7.16063  | 11.70934 |
| C        | 4.94379        | 6.23392        | 6.19971        | C  | -2.46864 | 6.65805 | 9.05464  | C | -8.40321 | 4.46841  | 12.28610 |
| C        | 5.83444        | 6.92115        | 5.38029        | C  | -1.37874 | 4.42689 | 9.09726  | C | -6.79667 | 2.68488  | 12.13605 |
| H        | 6.75577        | 6.43573        | 5.05860        | N  | -3.61497 | 7.29135 | 9.32965  | H | -5.03429 | 3.19909  | 10.95975 |
| C        | 5.53173        | 8.22560        | 4.98545        | C  | -2.50256 | 5.20918 | 9.34361  | C | -6.72515 | 5.16287  | 6.19907  |
| H        | 6.21594        | 8.78035        | 4.34391        | H  | -1.40681 | 3.35542 | 9.30586  | H | -5.28486 | 4.29997  | 7.58660  |
| C        | 4.33518        | 8.80193        | 5.42233        | Ru | -5.12975 | 6.11582 | 10.14904 | H | -3.76618 | 11.74229 | 10.46253 |
| H        | 4.05769        | 9.81604        | 5.13766        | C  | -3.74433 | 8.66931 | 8.99489  | C | -4.37561 | 11.35964 | 8.42951  |
| C        | 3.47830        | 8.05765        | 6.22297        | O  | -3.62492 | 4.73464 | 9.81147  | H | -3.52977 | 9.70679  | 12.15574 |
| H        | 2.52157        | 8.44185        | 6.57569        | N  | -6.73348 | 7.39597 | 10.56132 | H | -2.79431 | 8.24789  | 11.44560 |
| C        | 3.45917        | 3.23443        | 6.13080        | N  | -6.38467 | 4.76560 | 11.01881 | H | -1.93945 | 9.80072  | 11.39289 |
| H        | 2.78882        | 2.51942        | 6.62941        | N  | -4.61432 | 6.54414 | 12.07466 | H | -4.79435 | 10.65253 | 6.43363  |
| <b>H</b> | <b>4.27683</b> | <b>2.66315</b> | <b>5.66659</b> | N  | -6.10097 | 6.04397 | 8.34126  | H | -4.13868 | 7.01059  | 6.91652  |
| C        | 2.66411        | 3.99138        | 5.09663        | C  | -6.26281 | 8.28638 | 11.65959 | H | -5.05151 | 8.17772  | 5.92789  |
| C        | 2.60864        | 3.62337        | 3.75770        | C  | -5.39435 | 7.52235 | 12.62602 | H | -3.27949 | 8.18231  | 5.90993  |
| H        | 3.21410        | 2.78961        | 3.40298        | C  | -7.01787 | 8.09832 | 9.27759  | C | -5.31543 | 7.82997  | 13.97856 |
| C        | 1.77177        | 4.32845        | 2.88665        | C  | -6.97024 | 7.08430 | 8.15960  | H | -8.42698 | 8.02624  | 6.89591  |
| H        | 1.71461        | 4.05165        | 1.83424        | C  | -3.55131 | 9.65563 | 9.98443  | C | -7.60833 | 6.22418  | 6.00319  |
| C        | 1.01955        | 5.39252        | 3.38615        | C  | -4.13177 | 9.03723 | 7.68555  | H | -9.34345 | 4.88564  | 12.64632 |
| H        | 0.35688        | 5.96993        | 2.74272        | C  | -7.94431 | 6.59946 | 10.97437 | C | -8.01442 | 3.17062  | 12.62174 |
|          |                |                |                |    |          |         |          | H | -6.45272 | 1.67907  | 12.37367 |
|          |                |                |                |    |          |         |          | H | -6.59738 | 4.38476  | 5.44769  |
|          |                |                |                |    |          |         |          | C | -4.74447 | 12.79064 | 8.13268  |
|          |                |                |                |    |          |         |          | H | -8.64865 | 2.55121  | 13.25543 |
|          |                |                |                |    |          |         |          | H | -8.19626 | 6.29898  | 5.08882  |

C -3.73825 5.87885 12.85732  
H -5.96086 8.60488 14.39141  
C -4.39937 7.14897 14.78644

C -3.59640 6.16276 14.21220  
H -3.15327 5.10764 12.35746  
H -4.32042 7.38385 15.84755  
H -2.87185 5.60529 14.80444

H -5.66956 12.84970 7.54171  
H -4.88621 13.36529 9.05753  
H -3.95468 13.28877 7.54805  
H 0.91190 3.39200 8.47351

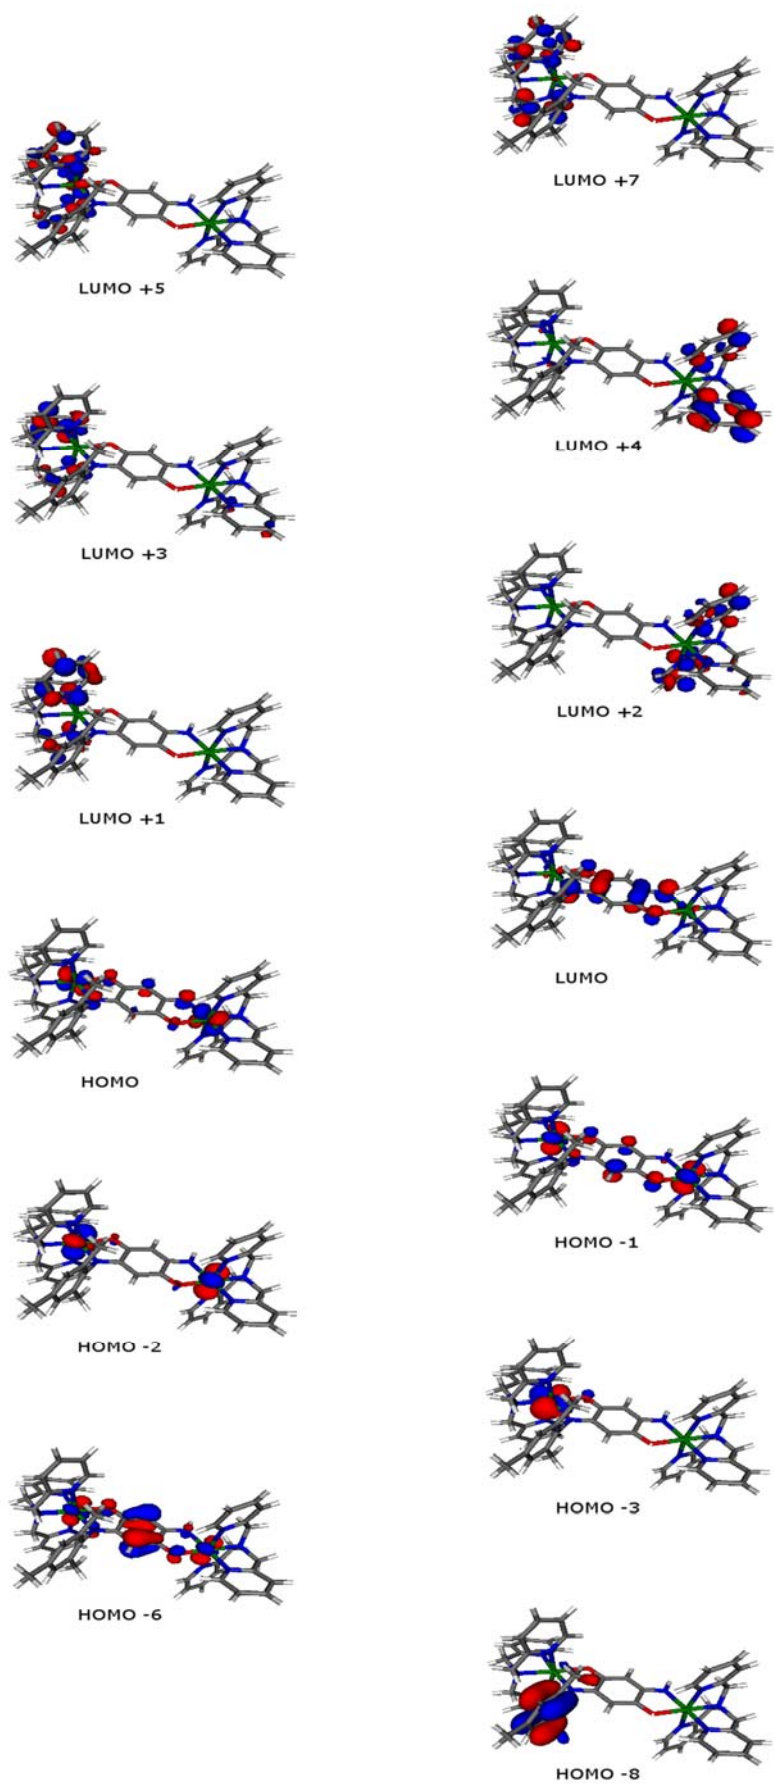

**Figure S34:** Contributing molecular orbitals of  $[2^{\text{NH,N(Mes)}}]^{2+}$  for the main absorption transitions.

**Table S11** Atomic coordinates of the optimised geometry of  $[2^{\text{NH,N(Mes)}}]^{3+}$ .

|    |                   |                  |                  |    |                   |                  |                   |
|----|-------------------|------------------|------------------|----|-------------------|------------------|-------------------|
| Ru | 2.39595994820262  | 5.54066276742966 | 7.46013348835931 | C  | 1.13680787143287  | 5.71013056695801 | 4.66722283918281  |
| O  | 0.92538340492842  | 6.98112181550243 | 7.73485733555833 | H  | 0.62348117648111  | 6.57897212596804 | 5.07752349902103  |
| N  | 0.91431872990054  | 4.44230134943386 | 8.23280328320420 | C  | 4.10608748986175  | 3.53056285315599 | 8.53758341852657  |
| N  | 3.89741567700306  | 4.13203468246576 | 7.18384966944306 | H  | 5.02769979004487  | 2.93184818333321 | 8.57940132827825  |
| N  | 3.78490093173791  | 6.76810190920342 | 6.57105642215450 | H  | 3.25957605238418  | 2.85832020591803 | 8.73629946347815  |
| N  | 1.90220250978988  | 5.01785896835365 | 5.53330498702228 | C  | 4.12444788938514  | 4.63764716401083 | 9.56368777949595  |
| N  | 3.31172365678384  | 5.70208683115885 | 9.29738544539885 | C  | 4.88746545975886  | 4.59175408609522 | 10.72337307687999 |
| C  | -0.18568880398368 | 6.52555686032060 | 8.24479853296454 | H  | 5.53969229674028  | 3.73862526944654 | 10.90661757476343 |
| C  | -1.30006681236830 | 7.31235049950734 | 8.51150949635410 | C  | 4.80628338145343  | 5.64742135419782 | 11.63660629178061 |
| H  | -1.27804974366378 | 8.38016379333125 | 8.29669332742083 | H  | 5.39696717519733  | 5.62623410340307 | 12.55205977516093 |
| C  | -0.21923150282766 | 5.07652920779216 | 8.53646940642047 | C  | 3.96996623286256  | 6.72760894168284 | 11.35583134931116 |
| C  | 5.17202309153589  | 4.79003364093063 | 6.71450445305929 | H  | 3.88233596390669  | 7.57071046654610 | 12.03930166990391 |
| H  | 5.84480041049109  | 4.86995760188662 | 7.58049217939229 | C  | 3.23859682974708  | 6.72418757714858 | 10.17189376455110 |
| H  | 5.67638375962966  | 4.15125185752833 | 5.97791008849834 | H  | 2.57236148100717  | 7.54011468574371 | 9.89435447942143  |
| C  | 4.93812175315055  | 6.17099893790324 | 6.17920001820467 | C  | -2.45643779152229 | 6.71594874168735 | 9.05801957940364  |
| C  | 5.86527235832346  | 6.84034534193083 | 5.38518222952613 | C  | -1.37386274414389 | 4.47545223834982 | 9.07969673893870  |
| H  | 6.77766892045199  | 6.33304366651036 | 5.07344321193737 | N  | -3.60143683282529 | 7.33607268797802 | 9.35826430512462  |
| C  | 5.60614047177210  | 8.15701286360724 | 5.00367385514359 | C  | -2.48214467704156 | 5.27213364586200 | 9.34219688606939  |
| H  | 6.31882891526572  | 8.69758570731202 | 4.38125880432994 | H  | -1.40324728714205 | 3.40534970887604 | 9.28929388670669  |
| C  | 4.42231324437491  | 8.76910401005617 | 5.42430230553779 | Ru | -5.08454538251508 | 6.10374249936249 | 10.15978041719505 |
| H  | 4.18368228166871  | 9.79443253845130 | 5.14660176122773 | C  | -3.74812607692221 | 8.72109784415639 | 9.05214636243886  |
| C  | 3.52983640742747  | 8.04241353078117 | 6.20089041257503 | O  | -3.59541754217279 | 4.79322306451499 | 9.83753496787244  |
| H  | 2.58017652308888  | 8.45197975469317 | 6.54363402180448 | N  | -6.72989710715543 | 7.35440346488452 | 10.54561282911281 |
| C  | 3.35954502685434  | 3.17639427967013 | 6.16715297508590 | N  | -6.34037564181770 | 4.71762521787061 | 11.00499061657658 |
| H  | 2.66898323735641  | 2.49980836095461 | 6.69114852523639 | N  | -4.63486177332102 | 6.57393537883844 | 12.10515905371236 |
| H  | 4.15889656984057  | 2.56364443430186 | 5.72690945281049 | N  | -6.04457659001990 | 6.03131708870914 | 8.33690360835976  |
| C  | 2.59147970879348  | 3.92151525341118 | 5.10457339872359 | C  | -6.30534134318819 | 8.27265926523628 | 11.64291551493152 |
| C  | 2.52741545519738  | 3.50910050552351 | 3.77912960048511 | C  | -5.44090808243317 | 7.54048721649438 | 12.63134685908088 |
| H  | 3.09864276825604  | 2.63942374464949 | 3.45643902349696 | C  | -7.01823013295630 | 8.05610384806330 | 9.26020236639930  |
| C  | 1.72865984709237  | 4.22166344639425 | 2.88006449798642 | C  | -6.93295355925465 | 7.04886594130106 | 8.14304780575148  |
| H  | 1.66780792316331  | 3.91183092438171 | 1.83714309295833 | C  | -3.56813617955991 | 9.68417351443717 | 10.06560027603248 |
| C  | 1.02077600596914  | 5.33537787512850 | 3.33234853271759 | C  | -4.13332955271998 | 9.11003905135552 | 7.74816040902203  |
| H  | 0.39124725113910  | 5.91911410497224 | 2.66263652263268 | C  | -7.92924915234766 | 6.53095249342239 | 10.94446442598122 |

|   |                   |                   |                   |   |                   |                   |                   |
|---|-------------------|-------------------|-------------------|---|-------------------|-------------------|-------------------|
| C | -7.54500350066248 | 5.16946331811689  | 11.43340394151921 | H | -1.99234174768706 | 9.86592759751115  | 11.50730879633252 |
| C | -5.94886200463330 | 3.46350738695086  | 11.32261755057665 | H | -4.80032850554117 | 10.74655332880726 | 6.52877965416351  |
| C | -5.88563848717233 | 5.09299833173048  | 7.38147281854385  | H | -4.15273081337867 | 7.10016853702151  | 6.92358631650607  |
| C | -3.91646010251709 | 11.01420205330103 | 9.79276893171310  | H | -5.01018499573856 | 8.31377077573550  | 5.94103219475097  |
| C | -2.94905619557184 | 9.33476941196810  | 11.39468973053093 | H | -3.24036997310588 | 8.28151557956310  | 5.98142311206596  |
| C | -4.47082684979055 | 10.44943250741726 | 7.52777841997556  | C | -5.38829705811635 | 7.86128797687443  | 13.98204949060601 |
| C | -4.14462318522420 | 8.14263527111445  | 6.59421461448992  | H | -8.38649565857888 | 7.95518013507182  | 6.85063170793507  |
| H | -5.71154104518916 | 9.07428193882506  | 11.17812752489667 | C | -7.49846557763958 | 6.17920116666322  | 5.97307329787809  |
| H | -7.17271627226432 | 8.73699206847296  | 12.13201743397693 | H | -9.34081208701529 | 4.77436813120676  | 12.54928434651696 |
| H | -8.00030831457130 | 8.54992376379991  | 9.28230455535150  | C | -7.98584625238072 | 3.08010557721989  | 12.53558314421585 |
| H | -6.24737011847837 | 8.82676041199514  | 9.12024613248792  | H | -6.39959487595424 | 1.61195374623461  | 12.30786493500931 |
| C | -7.67650514062301 | 7.13819553648887  | 6.97393576163721  | H | -6.42663751732273 | 4.36903051373469  | 5.43424473159503  |
| H | -8.55577879182777 | 6.40629172356665  | 10.04975521734108 | C | -4.78037334924053 | 12.84573379589167 | 8.27388841981476  |
| H | -8.53041611148535 | 7.07664946624597  | 11.68282073221610 | H | -8.62830047569348 | 2.44293686306900  | 13.14266359746572 |
| C | -8.38513979083255 | 4.37635831660336  | 12.20956154189497 | H | -8.06821294107949 | 6.24027748089119  | 5.04646361638189  |
| C | -6.75054710510296 | 2.61644858349546  | 12.07669001047787 | C | -3.76072878506078 | 5.92586909579131  | 12.90289581711326 |
| H | -4.96654787872210 | 3.16714647918167  | 10.95714689574621 | H | -6.05302601358820 | 8.62852776412478  | 14.37723564180169 |
| C | -6.59146175971006 | 5.14134067249379  | 6.18379397150290  | C | -4.47459577211433 | 7.20193880718976  | 14.80795102788142 |
| H | -5.16691938237467 | 4.30433403950168  | 7.59948233949359  | C | -3.64618683617067 | 6.22440705011476  | 14.25627665626522 |
| H | -3.79755116054931 | 11.75895091632480 | 10.58392781080485 | H | -3.15358910758966 | 5.15880458831152  | 12.42452779795148 |
| C | -4.39776346292085 | 11.41361438478242 | 8.54206635319807  | H | -4.41643834043100 | 7.44643060083597  | 15.86802562500126 |
| H | -3.58338562351274 | 9.64481896294134  | 12.23730746224619 | H | -2.92219276935712 | 5.68359818406689  | 14.86363989314453 |
| H | -2.74904355394026 | 8.26313024436559  | 11.48443785037532 | H | -5.74316348411488 | 12.90781296860813 | 7.74661320129889  |
|   |                   |                   |                   | H | -4.85805363106043 | 13.41863974618861 | 9.20699039182418  |
|   |                   |                   |                   | H | -4.03054844414245 | 13.34021338212497 | 7.63655499512498  |
|   |                   |                   |                   | H | 0.88855160422909  | 3.43536206697828  | 8.42171325022300  |

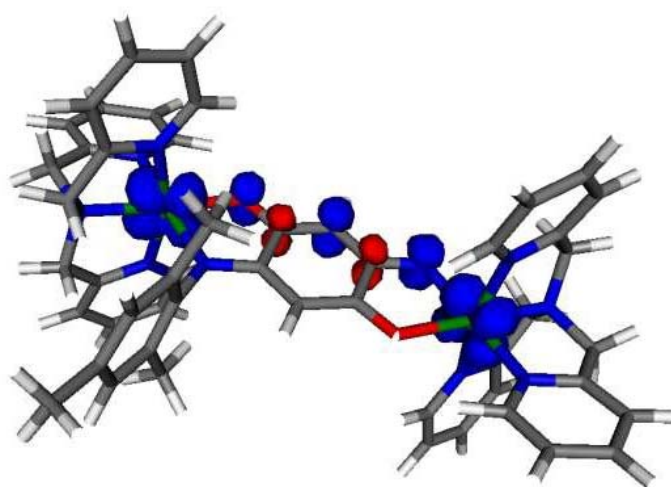

**Figure S35:** Spin-density distribution of  $[2^{NH,N(Mes)}]^{3+}$ .



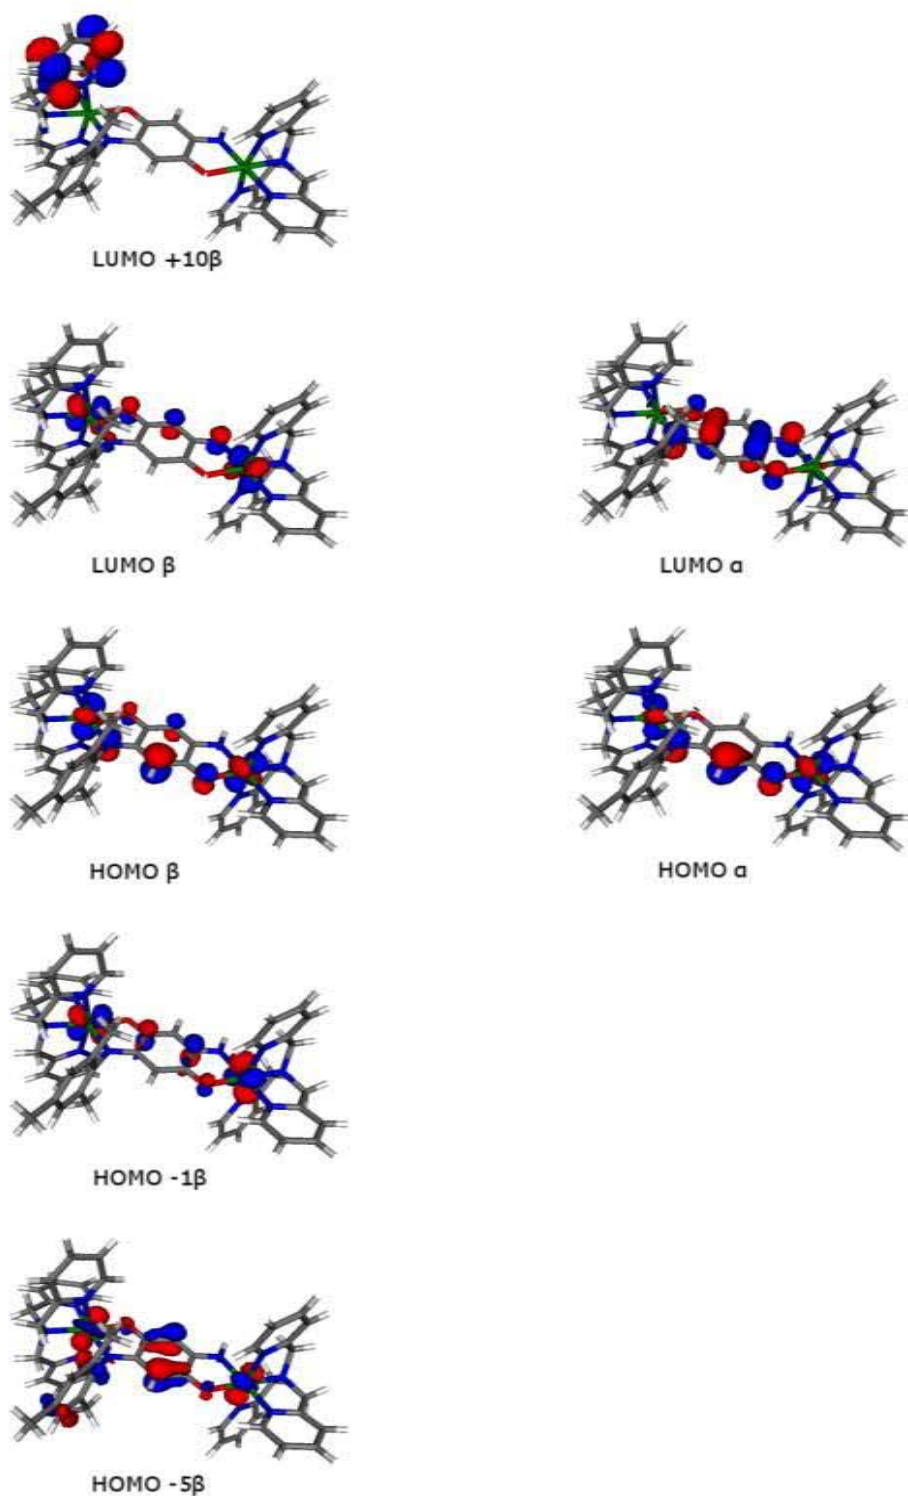

**Figure S36:** Contributing molecular orbitals of  $[2^{\text{NH,N(Mes)}}]^{3+}$  for the main absorption transitions.

**Table S12** Atomic coordinates of the optimised geometry of  $[2^{\text{NH,N(Mes)}}]^{4+}$ .

|    |                   |                  |                  |    |                   |                   |                   |
|----|-------------------|------------------|------------------|----|-------------------|-------------------|-------------------|
| Ru | 2.36172515606884  | 5.53441037572969 | 7.47524105920949 | C  | 1.11434984616822  | 5.71641137308172  | 4.68725816577496  |
| O  | 0.92518066848282  | 6.91595208624542 | 7.77080576974897 | H  | 0.60475042455132  | 6.58333983597701  | 5.10479209208998  |
| N  | 0.91036285727858  | 4.39766361860536 | 8.25693014662195 | C  | 4.14052853545022  | 3.52249898704217  | 8.49299906314707  |
| N  | 3.88987216118566  | 4.14780161714044 | 7.15612079289372 | H  | 5.07002409939625  | 2.93703461727245  | 8.49025914942212  |
| N  | 3.72777663636485  | 6.80581825567929 | 6.60286799496326 | H  | 3.30988867753325  | 2.83427830311002  | 8.70399930630644  |
| N  | 1.89103430023282  | 5.01306450625467 | 5.53496018415767 | C  | 4.17152227523247  | 4.61309403647402  | 9.52976568357873  |
| N  | 3.34399514093380  | 5.66873897698423 | 9.28751738568660 | C  | 4.95240238674693  | 4.56845039458795  | 10.67657666192724 |
| C  | -0.19033516944634 | 6.46294627657083 | 8.28305130613519 | H  | 5.61826628684443  | 3.72270506427463  | 10.84232064872875 |
| C  | -1.28993803348645 | 7.27009867114005 | 8.54456148438577 | C  | 4.86938332206150  | 5.61571726864222  | 11.59798618345346 |
| H  | -1.25372321697879 | 8.33817086396254 | 8.33525096387740 | H  | 5.47354753731641  | 5.59559189360153  | 12.50441681898556 |
| C  | -0.22441115704265 | 5.01916113973996 | 8.57253668313048 | C  | 4.01600602794308  | 6.68780957547084  | 11.33866891336523 |
| C  | 5.14339180327533  | 4.83680309004960 | 6.66746387680479 | H  | 3.92775059471585  | 7.52504407163461  | 12.02873265042686 |
| H  | 5.84986796511383  | 4.88330461074728 | 7.50833941674300 | C  | 3.26977777030972  | 6.68823928763855  | 10.16545794621257 |
| H  | 5.61921917955756  | 4.22860473459909 | 5.88804678137366 | H  | 2.59621484038213  | 7.50320773659660  | 9.90504278823550  |
| C  | 4.88737679951212  | 6.23617948044074 | 6.19372094396856 | C  | -2.44253867453453 | 6.67154042144903  | 9.09499668384283  |
| C  | 5.81072778025161  | 6.94909177546734 | 5.43412705939305 | C  | -1.37722249413644 | 4.42252092217195  | 9.12490103469621  |
| H  | 6.73088392048566  | 6.46612609901986 | 5.10766965987346 | N  | -3.58420811055435 | 7.30656655098902  | 9.39513043038828  |
| C  | 5.53792330136832  | 8.27684137380130 | 5.10750853859279 | C  | -2.47560687319010 | 5.23216967414021  | 9.38612994434475  |
| H  | 6.24795785829051  | 8.85101630258545 | 4.51301927047577 | H  | -1.41331503210240 | 3.35397594812139  | 9.33699426833295  |
| C  | 4.34572003783440  | 8.85870681883388 | 5.54667552962246 | Ru | -5.04895502535875 | 6.12388921209920  | 10.19205461851073 |
| H  | 4.09733357152804  | 9.89216556102124 | 5.31188818166032 | C  | -3.72778710454729 | 8.68404667828044  | 9.03484424621374  |
| C  | 3.45754875521455  | 8.09148620478219 | 6.28665670534796 | O  | -3.59645070617244 | 4.77616848476428  | 9.88218727507256  |
| H  | 2.50343764252568  | 8.47987957452749 | 6.64060598356109 | N  | -6.67737044801675 | 7.40326443117446  | 10.58099242069858 |
| C  | 3.35739733110094  | 3.18309034370204 | 6.14304449265786 | N  | -6.35131910126510 | 4.74107707110196  | 10.99938808713603 |
| H  | 2.67830530862416  | 2.49610787408660 | 6.66845999495613 | N  | -4.62849120005680 | 6.55796860753304  | 12.16203069950857 |
| H  | 4.16660676327965  | 2.58451021266990 | 5.70443811430304 | N  | -6.04459516112546 | 6.06510561170684  | 8.37913367167913  |
| C  | 2.58007702291592  | 3.92505680319595 | 5.09150481604147 | C  | -6.24847712768173 | 8.30677260976501  | 11.68908894149866 |
| C  | 2.50281063881057  | 3.52556131336898 | 3.76358360789602 | C  | -5.40754042320342 | 7.55079568314569  | 12.67872962089395 |
| H  | 3.07400326487620  | 2.66149770161154 | 3.42710639581853 | C  | -6.95809303441053 | 8.11972039637315  | 9.30100165360192  |
| C  | 1.69047988470491  | 4.24351546769472 | 2.88254129065337 | C  | -6.89703356875684 | 7.11180952606580  | 8.18400491911882  |
| H  | 1.61827647621777  | 3.94391678513385 | 1.83755575628197 | C  | -3.59160659937839 | 9.67617569396353  | 10.02612496908418 |
| C  | 0.98355438460232  | 5.35039559934611 | 3.35267649538066 | C  | -4.07319463474518 | 9.01526715316389  | 7.70520596427367  |
| H  | 0.34378500077134  | 5.93815240903965 | 2.69686817658152 | C  | -7.89490060092629 | 6.59744453058154  | 10.97083832341168 |
|    |                   |                  |                  | C  | -7.54896963095321 | 5.21297796935453  | 11.41862991399112 |
|    |                   |                  |                  | C  | -5.99096477628788 | 3.46938343293198  | 11.27922217024037 |
|    |                   |                  |                  | C  | -5.92312372026290 | 5.10615932375636  | 7.43930259194443  |
|    |                   |                  |                  | C  | -3.94812960128062 | 10.98961716688217 | 9.69737212963294  |
|    |                   |                  |                  | C  | -2.98490876193311 | 9.37797528870415  | 11.37249907292486 |
|    |                   |                  |                  | C  | -4.42458999182696 | 10.34137511906228 | 7.43435155191720  |

|   |                   |                   |                   |   |                   |                   |                   |
|---|-------------------|-------------------|-------------------|---|-------------------|-------------------|-------------------|
| C | -4.04036811979939 | 8.01229251291651  | 6.58306881118027  | C | -5.35017693599329 | 7.86934120158613  | 14.02952381212924 |
| H | -5.64248005313164 | 9.10708651065151  | 11.23902843514175 | H | -8.31991748456091 | 8.05502177571292  | 6.88386010156782  |
| H | -7.11424946240422 | 8.77793317968696  | 12.17281019132062 | C | -7.49661120070387 | 6.23920128827373  | 6.02601694582932  |
| H | -7.93284317893063 | 8.62555913392176  | 9.33331404297304  | H | -9.37379647553173 | 4.82507946283545  | 12.49032071015560 |
| H | -6.18075492939807 | 8.88301722145333  | 9.16212385578130  | C | -8.05735597330770 | 3.10175532657574  | 12.44219165232582 |
| C | -7.63778343164345 | 7.21620196808292  | 7.01432039858806  | H | -6.50553613851285 | 1.59969181467742  | 12.19517910296152 |
| H | -8.53775541990730 | 6.51627755489821  | 10.08293989784345 | H | -6.50120909403415 | 4.38015627264548  | 5.50482480087978  |
| H | -8.46939350815914 | 7.14023899237340  | 11.73139738632362 | C | -4.79219772405152 | 12.75310542077683 | 8.09217291252203  |
| C | -8.42195497887752 | 4.41621790091535  | 12.15377208651544 | H | -8.72564211300167 | 2.46146738866804  | 13.01721063651957 |
| C | -6.82625086513393 | 2.61954288394635  | 11.99042629361784 | H | -8.06636875021571 | 6.31126485505039  | 5.10026567608137  |
| H | -5.00982567736819 | 3.16051515395834  | 10.92181570460044 | C | -3.78325167018087 | 5.87466575616091  | 12.96094007766222 |
| C | -6.63155224921261 | 5.16752174441231  | 6.24498705678516  | H | -5.99041974799463 | 8.65764500582441  | 14.42288964778069 |
| H | -5.23433825979063 | 4.29327669689735  | 7.66409897601297  | C | -4.46495622590160 | 7.17653201600379  | 14.85808920620960 |
| H | -3.86090078860245 | 11.76191128291003 | 10.46514800621341 | C | -3.66767338670300 | 6.16913127673615  | 14.31406762092519 |
| C | -4.39780513787562 | 11.33800733913243 | 8.41907713284675  | H | -3.20140889635268 | 5.08595420252015  | 12.48687029904661 |
| H | -3.55499697185869 | 9.84206347558767  | 12.18867133849937 | H | -4.40521421272474 | 7.41819717067118  | 15.91866233020050 |
| H | -2.89863085976520 | 8.30443828284506  | 11.56430837368552 | H | -2.96827003986384 | 5.60303842642900  | 14.92657890222031 |
| H | -1.96869263660043 | 9.79810385115564  | 11.41617719906583 | H | -5.70844021235370 | 12.77925476526587 | 7.48595333081298  |
| H | -4.73140624100792 | 10.59992628446189 | 6.41817420798244  | H | -4.95774592313214 | 13.34149049539268 | 9.00359202311073  |
| H | -4.08839151428076 | 6.97713747289086  | 6.93213558112470  | H | -4.00270247094212 | 13.25178649616624 | 7.50825934789453  |
| H | -4.86428135621280 | 8.18349421956282  | 5.87895445826139  | H | 0.90622209888874  | 3.38985083861263  | 8.44219932856691  |
| H | -3.10208371726423 | 8.11696141429065  | 6.01626880282369  |   |                   |                   |                   |

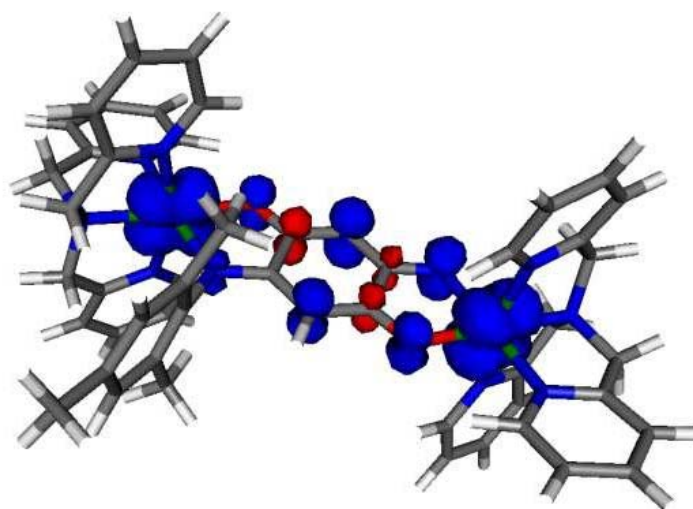

**Figure S37:** Spin-density distribution of  $[2^{\text{NH,N(Mes)}}]^{4+}$ .

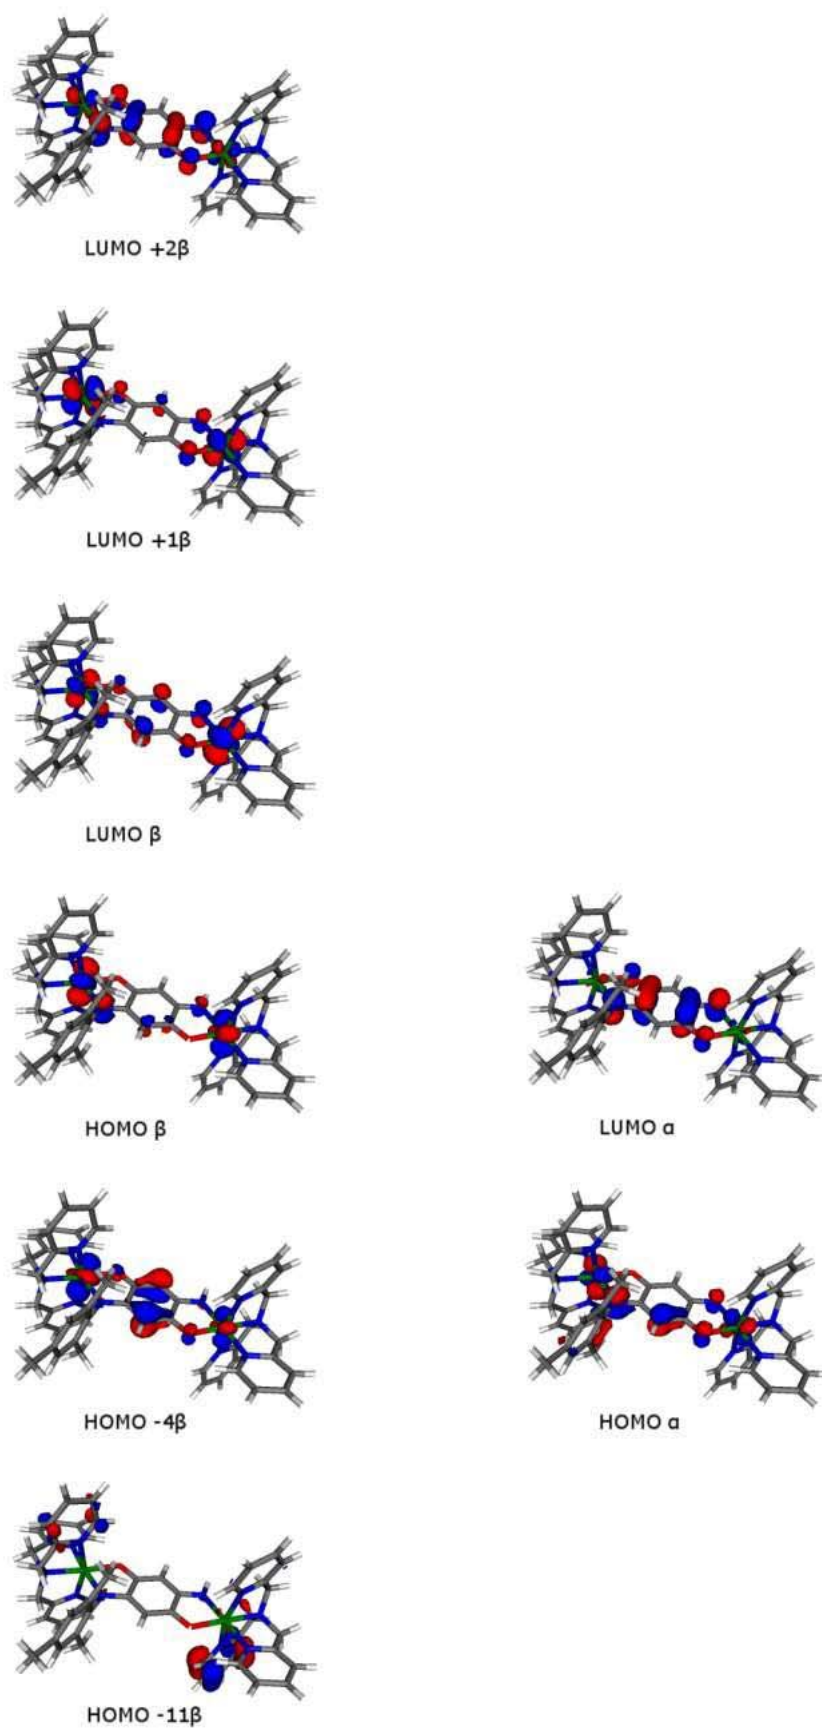

**Figure S38:** Contributing molecular orbitals of  $[2^{\text{NH},\text{N}(\text{Mes})}]^{4+}$  for the main absorption transitions.

**Table S13** Atomic coordinates of the optimized geometry of  $[2^{\text{NH,N(Mes)}}]^+$ .

|    |                   |                  |                  |    |                   |                   |                   |
|----|-------------------|------------------|------------------|----|-------------------|-------------------|-------------------|
| Ru | 2.46802750505337  | 5.55265664488606 | 7.53994353621201 | C  | 1.11283527685289  | 5.83353501379649  | 4.82657255712705  |
| O  | 0.98707482903542  | 6.98842432266854 | 7.87436526924708 | H  | 0.58307318532676  | 6.65391076558031  | 5.31068900000177  |
| N  | 1.00277804851803  | 4.40362633063748 | 8.37272754593424 | C  | 4.20390128252826  | 3.50468883622116  | 8.49470588191208  |
| N  | 3.96932410231154  | 4.16036816325216 | 7.17546384342726 | H  | 5.13378811040598  | 2.91343584181943  | 8.50548474379747  |
| N  | 3.77910197807984  | 6.78872948413406 | 6.59028671707809 | H  | 3.36361710094206  | 2.81906126396593  | 8.67179514296896  |
| N  | 1.90411816083552  | 5.10282451042056 | 5.64320564728280 | C  | 4.22115263025161  | 4.56253507947086  | 9.57543418066743  |
| N  | 3.41108218448812  | 5.64172465255312 | 9.35246416851002 | C  | 4.98105240734025  | 4.45530727405867  | 10.73272140632973 |
| C  | -0.13917329610630 | 6.47395477183044 | 8.35381976914729 | H  | 5.62958622543007  | 3.59050215122834  | 10.87298792445350 |
| C  | -1.28365946132141 | 7.24154273451370 | 8.59059293458340 | C  | 4.90119527605725  | 5.46119905674718  | 11.70410581196351 |
| H  | -1.26583449052926 | 8.31035054029804 | 8.36921267823504 | H  | 5.48768078930300  | 5.39022345083171  | 12.61990953225666 |
| C  | -0.16015987251135 | 5.04758917622954 | 8.63923721492850 | C  | 4.06399128519018  | 6.55309420767668  | 11.47447455911214 |
| C  | 5.22135908106334  | 4.85889595187884 | 6.71647540056251 | H  | 3.96986050648996  | 7.35788937370833  | 12.20291984551918 |
| H  | 5.84840399580464  | 5.01114324456376 | 7.60741784621039 | C  | 3.33746340041296  | 6.61165322004922  | 10.28731644717215 |
| H  | 5.78942694817989  | 4.22051230270291 | 6.02554652761019 | H  | 2.66595612200892  | 7.43645916283706  | 10.04994755380811 |
| C  | 4.91928045582329  | 6.20102366946417 | 6.11984451287675 | C  | -2.45830581637463 | 6.65056740286203  | 9.10651166761173  |
| C  | 5.75379921376973  | 6.84120524846816 | 5.21131192204059 | C  | -1.33853373099129 | 4.45928950742203  | 9.15696616095885  |
| H  | 6.64452062038353  | 6.32872729919562 | 4.84670870810021 | N  | -3.62528280231265 | 7.30584676855335  | 9.36018283189530  |
| C  | 5.43944958262271  | 8.13449488555459 | 4.78058989246504 | C  | -2.48298418033359 | 5.22807732996152  | 9.39255356309603  |
| H  | 6.08161657022446  | 8.65343534400722 | 4.06951263701013 | H  | -1.36374622717170 | 3.38614092116585  | 9.36804255908925  |
| C  | 4.27852831829077  | 8.73962609589986 | 5.27691121659341 | Ru | -5.13010700324068 | 6.11179038396259  | 10.15479479050257 |
| H  | 3.98898168001462  | 9.74410026975532 | 4.96897044500485 | C  | -3.74145532053469 | 8.67154628904220  | 9.01257211771205  |
| C  | 3.47244467170521  | 8.04075226065527 | 6.16549218062783 | O  | -3.61387720992939 | 4.71451666833871  | 9.85697147474730  |
| H  | 2.54321927643518  | 8.44814393397790 | 6.56373361202706 | N  | -6.75267595079211 | 7.38654194465322  | 10.51615403627905 |
| C  | 3.41085630765335  | 3.25687444825919 | 6.12431335957252 | N  | -6.38580757034086 | 4.77097846768075  | 11.03089945801442 |
| H  | 2.73651843317173  | 2.55633215570687 | 6.63702874745138 | N  | -4.67092734691261 | 6.53926443778389  | 12.08643797635690 |
| H  | 4.19960137951493  | 2.67000639214648 | 5.62831647880722 | N  | -6.03834215781005 | 6.02385780729350  | 8.32034283281360  |
| C  | 2.61151107389042  | 4.05264713684317 | 5.12165734460992 | C  | -6.31021874256877 | 8.27902983963174  | 11.62482346294482 |
| C  | 2.54770897879059  | 3.73921293617654 | 3.76944780959854 | C  | -5.48450492526404 | 7.50453677960807  | 12.62077181264409 |
| H  | 3.13943379232393  | 2.90987229529643 | 3.38155201737570 | C  | -7.00513929309180 | 8.07472725293275  | 9.22055736445243  |
| C  | 1.72374178843914  | 4.49300169100060 | 2.92530392232419 | C  | -6.91330556058473 | 7.05461884716168  | 8.10841465757099  |
| H  | 1.66109118684030  | 4.25892139035521 | 1.86283482174683 | C  | -3.57398999953054 | 9.67090433027032  | 9.99802237395238  |
| C  | 0.99335338213649  | 5.55337158333505 | 3.46924823037662 | C  | -4.08275182842342 | 9.04645469242508  | 7.68942706473512  |
| H  | 0.34098014055300  | 6.16767227405975 | 2.84911965735988 | C  | -7.96412833704343 | 6.57987380144273  | 10.90108053258732 |
|    |                   |                  |                  | C  | -7.58298080671811 | 5.25110976384061  | 11.47474560966292 |
|    |                   |                  |                  | C  | -5.99240580806802 | 3.53460801616987  | 11.42810627956074 |
|    |                   |                  |                  | C  | -5.88436886433474 | 5.08641219026398  | 7.36196929532545  |
|    |                   |                  |                  | C  | -3.90402424599903 | 10.99790019844387 | 9.68783069262808  |
|    |                   |                  |                  | C  | -2.99617785325457 | 9.33959874406715  | 11.35068256614267 |

|   |                   |                   |                   |   |                  |                  |                  |
|---|-------------------|-------------------|-------------------|---|------------------|------------------|------------------|
| C | -4.40038737649064 | 10.38325923092456 | 7.42375044410036  | H | 0.98111472026743 | 3.40177657985598 | 8.56995445284888 |
| C | -4.08533459866379 | 8.04338314548962  | 6.56601608747669  |   |                  |                  |                  |
| H | -5.68126425317108 | 9.05630964161022  | 11.16646635380514 |   |                  |                  |                  |
| H | -7.16215358084037 | 8.77416531617679  | 12.11638148940575 |   |                  |                  |                  |
| H | -7.98121631135662 | 8.58596744384077  | 9.20555726806265  |   |                  |                  |                  |
| H | -6.21605790270156 | 8.82795759620263  | 9.08773162791461  |   |                  |                  |                  |
| C | -7.64446069465654 | 7.14968617649964  | 6.93197806126550  |   |                  |                  |                  |
| H | -8.53944735124762 | 6.40405193023752  | 9.98021650313900  |   |                  |                  |                  |
| H | -8.60815219462204 | 7.15429927929042  | 11.58135801006432 |   |                  |                  |                  |
| C | -8.39581727920545 | 4.51773806958816  | 12.33151723025328 |   |                  |                  |                  |
| C | -6.77172661499016 | 2.74536620353297  | 12.26310913088446 |   |                  |                  |                  |
| H | -5.01888290099618 | 3.21937258929715  | 11.05268650671491 |   |                  |                  |                  |
| C | -6.57901008746558 | 5.13707088793438  | 6.15636424806553  |   |                  |                  |                  |
| H | -5.16794991600618 | 4.29855215239342  | 7.59347342271831  |   |                  |                  |                  |
| H | -3.80277710777396 | 11.76131178332811 | 10.46486138109873 |   |                  |                  |                  |
| C | -4.34642460506615 | 11.37295958928084 | 8.41473689108709  |   |                  |                  |                  |
| H | -3.64009455147241 | 9.68495968826189  | 12.17300122491896 |   |                  |                  |                  |
| H | -2.84219565219818 | 8.26175974504177  | 11.45838150633405 |   |                  |                  |                  |
| H | -2.02432780284917 | 9.84134513821932  | 11.47564832756112 |   |                  |                  |                  |
| H | -4.70277629485297 | 10.65903263818841 | 6.40909439419172  |   |                  |                  |                  |
| H | -3.98861521642520 | 7.02204783469610  | 6.94409966417538  |   |                  |                  |                  |
| H | -5.00301439192048 | 8.11442784105469  | 5.96548548088497  |   |                  |                  |                  |
| H | -3.23578851783032 | 8.23088411849936  | 5.89107091735718  |   |                  |                  |                  |
| C | -5.48518724292724 | 7.77407938563220  | 13.98321990396542 |   |                  |                  |                  |
| H | -8.34075666843203 | 7.97748291338008  | 6.79803099760670  |   |                  |                  |                  |
| C | -7.47233427537774 | 6.18467785562971  | 5.93249850302807  |   |                  |                  |                  |
| H | -9.33696869948780 | 4.94624601736435  | 12.67711502762837 |   |                  |                  |                  |
| C | -7.99409677490794 | 3.24016918084332  | 12.73346357339429 |   |                  |                  |                  |
| H | -6.41398295475296 | 1.75705943603581  | 12.55083496568836 |   |                  |                  |                  |
| H | -6.41475421403890 | 4.36257588358806  | 5.40788721130136  |   |                  |                  |                  |
| C | -4.70605764715090 | 12.80368478333119 | 8.10150516723196  |   |                  |                  |                  |
| H | -8.61713630075981 | 2.64842944365292  | 13.40354356726447 |   |                  |                  |                  |
| H | -8.03243812338882 | 6.25125219965976  | 5.00005734297519  |   |                  |                  |                  |
| C | -3.84626282999649 | 5.84873177024101  | 12.90527852262786 |   |                  |                  |                  |
| H | -6.15564251123460 | 8.53764977507727  | 14.37793498549290 |   |                  |                  |                  |
| C | -4.62026752676342 | 7.06862533898818  | 14.82794004757054 |   |                  |                  |                  |
| C | -3.78760471566000 | 6.09296255246380  | 14.27341537532873 |   |                  |                  |                  |
| H | -3.23352195282811 | 5.09299700669494  | 12.41413530884336 |   |                  |                  |                  |
| H | -4.60525031329234 | 7.27332459505301  | 15.89816346464431 |   |                  |                  |                  |
| H | -3.10109508793356 | 5.51637898353395  | 14.89288095771038 |   |                  |                  |                  |
| H | -5.64128813272398 | 12.86450518347939 | 7.52591330748616  |   |                  |                  |                  |
| H | -4.82791907758135 | 13.39356647163874 | 9.01986792712621  |   |                  |                  |                  |
| H | -3.92310763762622 | 13.28740390657208 | 7.49566551744542  |   |                  |                  |                  |

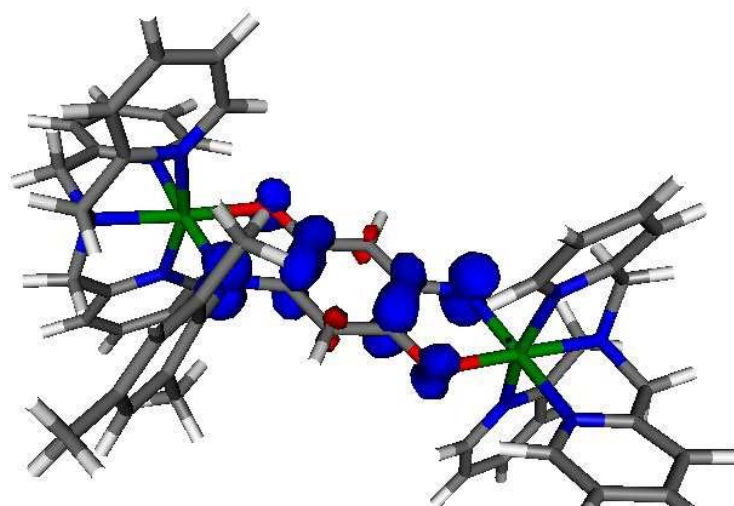

**Figure S39:** Spin-density distribution of  $[2^{\text{NH},\text{N}(\text{Mes})}]^+$ .
